# Supplementary material for: Teacher-student collaborated multiple instance learning for pan-cancer PDL1 expression prediction from histopathology slides
Source: Nat Commun. 2024 Apr 9;15:3063. doi: 10.1038/s41467-024-46764-0 (PMC11004138; doi:10.1038/s41467-024-46764-0)
Supplement: Supplementary file 4 — Source Data [file 41467_2024_46764_MOESM4_ESM.xlsx]

## Sheet: Fig1-c
Fresh&frozen	BLCA	CESC	COAD	KIRP	LUAD	LUSC	SKCM	STAD	TNBC
AUC	0.870411	0.90877	0.914652	0.765125	0.741848	0.726996	0.874301	0.853556	0.641199
Accuracy	0.765476	0.868354	0.865079	0.692647	0.685128	0.65935	0.795122	0.729323	0.580952
Sensitivity	0.880309	0.82664	0.871964	0.846939	0.738534	0.753915	0.783667	0.90276	0.806167
Specificity	0.712522	0.890189	0.861286	0.628421	0.651725	0.596838	0.802292	0.652533	0.470381
FFPE	BLCA	CESC	COAD	KIRP	LUAD	LUSC	SKCM	STAD	TNBC
AUC	0.80851	0.798316	0.845958	0.830587	0.708713	0.609841	0.708666	0.820492	0.535362
Accuracy	0.756757	0.745283	0.824074	0.808824	0.666667	0.612903	0.619632	0.793478	0.606061
Sensitivity	0.777778	0.774194	0.666667	0.666667	0.72095	0.535735	0.816327	0.695652	0.538462
Specificity	0.77027	0.733755	0.939394	0.836364	0.625	0.7	0.521739	0.797199	0.62

## Sheet: Fig2-a
MILTS	BLCA	CESC	COAD	KIRP	LUAD	LUSC	SKCM	STAD	TNBC
AUC	0.870411	0.90877	0.914652	0.765125	0.741848	0.726996	0.874301	0.853556	0.641199
Accuracy	0.765476	0.868354	0.865079	0.692647	0.685128	0.65935	0.795122	0.729323	0.580952
F1-score	0.707869	0.806287	0.828422	0.618491	0.636507	0.625333	0.698703	0.673088	0.577239
MCC	0.554269	0.708217	0.720395	0.433303	0.377761	0.341441	0.555387	0.513203	0.272494
Campanella's	BLCA	CESC	COAD	KIRP	LUAD	LUSC	SKCM	STAD	TNBC
AUC	0.695916	0.586825	0.651937	0.604275	0.542994	0.558908	0.606272	0.750196	0.508373
Accuracy	0.714286	0.594937	0.650794	0.602941	0.569231	0.628099	0.528455	0.706767	0.571429
F1-score	0.608856	0.500617	0.555664	0.50299	0.491524	0.490792	0.518606	0.618718	0.448959
MCC	0.396388	0.200111	0.28285	0.23002	0.139652	0.206148	0.232871	0.415682	0.12509
TransMIL	BLCA	CESC	COAD	KIRP	LUAD	LUSC	SKCM	STAD	TNBC
AUC	0.838953	0.64849	0.708806	0.571429	0.581512	0.658297	0.816023	0.819353	0.526602
Accuracy	0.768293	0.64557	0.730159	0.544118	0.6	0.65625	0.762295	0.770833	0.603175
F1-score	0.695958	0.495285	0.592103	0.453488	0.491243	0.476703	0.709453	0.744976	0.466212
MCC	0.533775	0.188001	0.366913	0.119342	0.138903	0.168586	0.572096	0.624009	0.16868
CLAM	BLCA	CESC	COAD	KIRP	LUAD	LUSC	SKCM	STAD	TNBC
AUC	0.783108	0.7779	0.775686	0.643333	0.61134	0.563995	0.812777	0.830865	0.725995
Accuracy	0.77381	0.721519	0.706349	0.617647	0.692308	0.603306	0.756098	0.758621	0.714286
F1-score	0.643815	0.645052	0.667023	0.520833	0.476374	0.502747	0.667222	0.644562	0.619137
MCC	0.48742	0.444627	0.437022	0.260451	0.323654	0.178369	0.504316	0.459659	0.399701

## Sheet: Fig2-b
Campanella's	COAD	BRCA
AUC	0.517191	0.49707
Accuracy	0.704545	0.559796
Sensitivity	0.774725	0.456693
Specificity	0.408163	0.624753
TransMIL	COAD	BRCA
AUC	0.529766	0.517437
Accuracy	0.468182	0.568528
Sensitivity	0.389362	0.479591
Specificity	0.791667	0.618301
CLAM	COAD	BRCA
AUC	0.689236	0.601662
Accuracy	0.586364	0.65736
Sensitivity	0.525569	0.389242
Specificity	0.855844	0.833648
MILTS	COAD	BRCA
AUC	0.680734	0.621109
Accuracy	0.622727	0.619289
Sensitivity	0.585011	0.604409
Specificity	0.775686	0.620482

## Sheet: Fig2-c
AUC	COAD	SKCM	STAD
FS+average pooling	0.863	0.777	0.785
TS+average pooling	0.9	0.838	0.819
MILTS	0.915	0.874	0.873
Accuracy	COAD	SKCM	STAD
FS+average pooling	0.777	0.65	0.662
TS+average pooling	0.873	0.748	0.722
MILTS	0.865	0.795	0.729
F1-score	COAD	SKCM	STAD
FS+average pooling	0.736	0.613	0.615
TS+average pooling	0.829	0.635	0.648
MILTS	0.828	0.699	0.673
MCC	COAD	SKCM	STAD
FS+average pooling	0.559	0.425	0.414
TS+average pooling	0.729	0.468	0.465
MILTS	0.72	0.555	0.513

## Sheet: Fig3-a
BLCA_pos	BLCA_neg	CESC_pos	CESC_neg	COAD_pos	COAD_neg	KIRP_pos	KIRP_neg	LUAD_pos	LUAD_neg	LUSC_pos	LUSC_neg	SKCM_pos	SKCM_neg	STAD_pos	STAD_neg	TNBC_pos	TNBC_neg
0.519661	0.102038	0.520834	0.208039	0.383059	0.435314	0.000233692	0.00517234	0.945459	0.016206	0.732832	0.696615	0.703032	0.0922274	0.261724	0.0463347	0.217514	0.353102
0.584276	0.306558	0.316066	0.235323	0.538635	0.0476991	0.462882	1.40384e-06	0.194577	0.412591	0.0712264	0.0307866	0.569554	0.211053	0.215031	0.16499	0.590956	0.1926
0.305255	0.136147	0.197587	0.273633	0.747162	0.00326738	0.930191	0.00210252	0.6038	0.436192	0.423016	0.174165	0.467042	0.173798	0.152775	0.167745	0.216084	0.157786
0.402618	0.0131107	0.609296	0.426122	0.519294	0.241299	1	0.0143198	0.432607	0.273135	0.00761653	0.374221	0.488337	0.242841	0.436694	0.0508106	0.378056	0.145677
0.188734	0.12299	0.572519	0.0693956	0.237502	0.0406388	6.94671e-08	0.5708	0.597691	0.154737	0.0907291	0.294248	0.642465	0.327363	0.500934	0.159452	0.568669	0.181901
0.695468	0.262393	0.690619	0.383762	0.468268	0.27202	1	0.98458	0.417196	0.25496	0.000909446	0.0080367	0.664682	0.482221	0.726904	0.418763	0.309029	0.123639
0.433207	0.287483	0.465326	0.11082	0.279456	0.0594074	0.167481	2.77372e-07	0.517102	0.123878	0.51466	0.00295697	0.516109	0.490709	0.125172	0.00061752	0.731983	0.109
0.465274	0.188464	0.571856	0.482042	0.48395	0.133176	0.256888	0.656969	0.472675	0.42981	0.407742	3.37751e-10	0.409344	0.439592	0.606798	4.33482e-06	0.139772	0.204378
0.327558	0.153081	0.455331	0.217984	0.510888	0.0356371	0.957705	2.45399e-06	0.499595	0.273842	0.0520709	0.038879	0.512031	0.671243	0.378133	0.000855938	0.543644	0.318782
0.621117	0.0147275	0.56996	0.211167	0.652588	0.382707	0.00116768	0.000132773	0.132839	0.118373	0.62072	0.110741	0.491228	0.282813	0.0352135	0.391316	0.101721	0.235537
0.755787	0.39684	0.613472	0.28846	0.422763	0.0326885	0.999795	0.000119569	0.278798	0.269729	0.0149103	0.241966	0.737601	0.382193	0.0802716	0.349472	0.408015	0.189393
0.5154	0.221334	0.41118	0.223844	0.993081	0.158257	0.000309498	0.0200477	0.563565	0.448254	0.469501	0.480221	0.333642	0.465646	0.774974	0.324777	0.433808	0.358357
0.646149	0.193082	0.472676	0.41001	0.8925	0.119977	0.0135124	0.000177969	0.435725	0.284505	0.276871	0.0105902	0.307177	0.248557	0.997614	0.0493003	0.0793838	0.374638
0.740538	0.164053	0.403289	0.20167	0.680845	0.059896	0.00612212	8.17215e-05	0.350283	0.377573	0.104503	0.00116887	0.475208	0.457363	0.978972	0.0175742	0.404604	0.301236
0.509019	0.465146	0.544424	0.300382	0.503336	0.00462271	0.563432	1.03295e-05	0.481131	0.143371	0.421005	0.674269	0.528669	0.208236	0.619707	0.425375	0.242628	0.291696
0.60924	0.250384	0.257071	0.0655823	0.270066	0.000265011	0.99982	0.61808	0.168784	0.578139	0.00749753	0.000266495	0.441085	0.30042	0.965292	0.041198	0.441164	0.629419
0.515961	0.214429	0.445197	0.278631	0.731173	0.291261	0.998971	0.000583443	0.41895	0.329208	0.0420453	2.49836e-05	0.632918	0.384176	0.0735598	0.0657868	0.111091	0.424947
0.215422	0.426747	0.841844	0.508833	0.777706	0.0122367	0.99643	1.76369e-05	0.904817	0.4478	0.866735	0.000142586	0.475396	0.109413	0.539739	0.366606	0.235795	0.0954287
0.150495	0.477121	0.405593	0.385037	0.737144	0.115544	0.998872	0.138517	0.463308	0.121136	0.468853	0.0455602	0.547088	0.267828	0.999374	0.163108	0.314833	0.156457
0.59876	0.0946099	0.613399	0.263046	0.950167	0.0558437	0.877619	0.999052	0.294432	0.226721	0.451374	0.191012	0.563108	0.298519	0.0479351	0.000863933	0.429509	0.154783
0.349005	0.228121	0.527222	0.317007	0.624336	0.00068566	0.506524	0.579241	0.996268	0.429177	0.998112	0.120317	0.536203	0.431583	0.613485	0.114789	0.284391	0.291966
0.124557	0.00858277	0.470082	0.0531759	0.419066	0.413635	0.704655	0.00136449	0.438926	0.214683	0.478277	0.00914113	0.579392	0.163813	0.0885252	0.111865	0.318658	0.314787
0.397521	0.305755	0.262071	0.217481	0.465945	0.000350925	0.975841	1.02435e-05	0.545361	0.161872	0.00413418	0.366806	0.387239	0.379238	0.999938	0.0700507	0.227524	0.0720809
0.555663	0.53401	0.40973	0.141749	0.632663	0.0339653	0.999701	0.181427	0.573323	0.00866866	0.00961543	0.000169842	0.134575	0.392862	0.119002	0.00563848	0.303972	0.207395
0.312605	0.00360231	0.489496	0.4075	0.772124	0.177746	0.158536	0.00897506	0.858466	0.11987	0.102241	0.0287841	0.567311	0.365395	0.389134	0.203271	0.0752412	0.240544
0.646933	0.218177	0.45495	0.0456289	0.775265	0.0288759	1	0.00339615	0.713914	0.398866	0.196421	0.000304998	0.416881	0.305673	0.457219	0.223816	0.372073	0.473228
0.472578	0.48377	0.442118	0.287043	0.289108	0.0227786	0.0040586	0.00207958	0.523758	0.423844	0.663779	0.00151437	0.419806	0.518757	0.985933	0.246905	0.259073	0.0667773
0.568651	0.235449	0.385719	0.413386	0.631472	0.00450228	0.999318	5.4202e-08	0.531593	0.433333	0.653788	0.0278429	0.370237	0.337668	0.689779	0.188687	0.0112179	0.286419
0.711085	0.574292	0.392951	0.443568	0.529769	0.457224	0.000833327	6.60275e-06	0.421893	0.263345	0.911683	0.0149845	0.482213	0.449566	0.384138	0.32832	0.159158	0.386682
0.549129	0.414173	0.846603	0.07258	0.959052	0.120006	0.16748	0.0773707	0.414048	0.425942	1	0.0774106	0.527051	0.368587	0.868638	0.0397611	0.204462	0.252442
0.570197	0.00312572	0.48231	0.517184	0.437437	0.153266	0.0971334	1.80497e-05	0.564993	0.37784	0.324677	7.13807e-06	0.513754	0.119246	0.367633	0.0100583	0.0587717	0.197382
0.262314	0.202883	0.882661	0.362797	0.590887	0.0331866	0.00307368	0.238738	0.433894	0.112514	0.00528909	0.00111827	0.552438	0.164038	0.180984	0.169726	0.260404	0.230723
0.367112	0.105876	0.793979	0.134763	0.882719	0.0904475	1.51678e-05	0.0270481	0.231573	0.225712	0.0487886	0.157967	0.467842	0.411678	0.174205	0.827316	0.294214	0.0469147
0.925734	0.299512	0.543722	0.430703	0.356376	0.0190063	0.333424	0.730244	0.260905	0.28161	0.320922	0.340147	0.540324	0.304272	0.626322	0.0324674	0.319324	0.190907
0.426698	0.200101	0.489815	0.194512	0.479477	0.0878547	0.922091	0.933168	0.398319	0.550739	0.0012743	0.00970212	0.464371	0.458726	0.518952	0.335022	0.437452	0.256302
0.912486	0.208822	0.377098	0.420081	0.654905	0.0875458	0.274793	0.000192972	0.0653042	0.195315	0.541043	0.406891	0.678644	0.340031	0.172934	0.330808	0.143623	0.272424
0.33979	0.428924	0.362139	0.228995	0.623494	0.00132774	0.00108139	0.000905613	0.369816	0.312028	0.352839	0.441387	0.349778	0.126989	0.800897	0.010575	0.0758684	0.30849
0.653997	0.425146	0.478927	0.263947	0.616298	0.387073	0.995289	0.00710426	0.45538	0.0671057	0.367994	0.309978	0.507277	0.425601	0.18548	0.128829	0.242103	0.20582
0.352023	0.0773103	0.331585	0.162882	0.466049	0.260279	0.00191151	2.25531e-05	0.413522	0.378908	0.247695	0.366823	0.686325	0.360207	0.0830997	0.0136458	0.0616631	0.253763
0.413686	0.187595	0.670208	0.0217834	0.5679	0.0396958	0.00899887	0.000426603	0.528595	0.161159	0.0610824	0.210072	0.481063	0.437446	0.369482	0.255619	0.112409	0.146094
0.283766	0.325844	0.493233	0.350548	0.46628	0.545006	2.51355e-05	0.987727	0.205301	0.37007	0.961085	0.302848	0.449413	0.159756	0.310215	0.112368	0.95022	0.351123
0.551189	0.0120974	0.494924	0.0104957	0.699034	0.0120463	0.496293	0.879834	0.427645	0.0170777	0.183476	4.82198e-05	0.493952	0.410952	0.497347	0.36575	0.476509	0.248172
0.173285	0.31708	0.714613	0.227868	0.948367	0.0533288	0.510957	0.23604	0.477128	0.259639	0.578227	0.151239	0.53788	0.398414	0.167301	0.0877584	0.0944963	0.398777
0.678224	0.502848	0.534545	0.172343	0.831724	0.774597	0.933603	3.43975e-05	0.446773	0.143602	0.64291	0.0648536	0.198159	0.645185	0.974621	0.00596508	0.400612	0.283338
0.527689	0.310171	0.57981	0.0312798	0.802506	0.145381	0.991065	0.29188	0.517521	0.442182	0.925958	0.146816	0.431502	0.183854	0.998776	0.266951	0.0245737	0.247922
0.630161	0.351953	0.301478	0.293506	0.129966	0.000252116	0.974056	1.08331e-05	0.290391	0.378854	0.517282	0.382144	0.527569	0.141824	0.0880061	0.274139	0.734107	0.0605782
0.581254	0.300916	0.409917	0.133022	0.152893	0.0346967	1	0.000139828	0.528346	0.325782	0.681897	0.000290508	0.509822	0.231446	0.997794	0.0805465	0.539194	0.450388
0.603449	0.265302	0.104547	0.665889	0.849009	0.272238	0.999999	7.65118e-07	0.762163	0.385301	0.222203	0.122902	0.408268	0.237175	0.0616615	0.0883178	0.0763224	0.109568
0.649047	0.067775	0.65102	0.263159	0.265025	0.470587	0.979666	0.454969	0.119143	0.421239	0.465375	0.566664	0.417298	0.688063	0.220254	0.0829658	0.279692	0.212738
0.383547	0.334049	0.636652	0.267622	0.376055	0.141589	0.999993	0.993205	0.547531	0.452775	0.991759	0.00131479	0.457688	0.461991	0.109398	0.349619	0.262019	0.371343
0.800263	0.321768	0.375436	0.295923	0.823368	0.00972318	0.997447	7.20641e-06	0.42646	0.436949	0.0314077	3.98179e-05	0.468976	0.331776	0.0637945	0.13938	0.861836	0.193917
0.535957	0.257739	0.489537	0.274949	0.329995	0.0111005	0.771533	1.06499e-05	0.449146	0.0958288	0.33901	0.134139	0.810218	0.372225	0.141903	0.31916	0.075853	0.160726
0.266775	0.176744	0.639169	0.222694	0.610747	0.175192	0.48082	0.000301929	0.996816	0.464282	0.0598653	0.335306	0.794013	0.278959	0.588456	0.119573	0.305863	0.252386
0.59065	0.627438	0.473417	0.223548	0.583571	0.23968	4.54144e-06	0.0188583	0.583918	0.501971	0.438803	0.0428077	0.446495	0.160019	0.602497	0.0649456	0.191483	0.31508
0.66988	0.480026	0.860304	0.43541	0.753125	0.00551626	0.182175	0.00594198	0.324511	0.226091	0.434039	0.0944486	0.539209	0.44104	0.736392	0.286611	0.272431	0.315634
0.685885	0.153884	0.631672	0.287385	0.1697	0.000838754	0.0407683	0.921459	0.876845	0.416029	0.739497	0.407964	0.381419	0.1987	0.172063	0.0280958	0.397047	0.406107
0.667229	0.142539	0.388755	0.540786	0.4551	0.132754	0.999866	0.112506	0.264865	0.518513	0.158622	0.339945	0.530403	0.497159	0.0561379	0.000248651	0.0368844	0.247503
0.708956	0.246781	0.359209	0.437088	0.938212	0.249233	0.154475	0.0094595	0.18545	0.211945	0.807399	0.0705865	0.466939	0.456585	0.242486	0.0994289	0.144075	0.294916
0.376455	0.401229	0.726933	0.0310774	0.901331	0.232069	0.712507	3.04543e-05	0.493645	0.601772	0.294508	0.221427	0.481774	0.21827	0.0872025	0.0442831	0.373906	0.521933
0.449565	0.119496	0.330461	0.0200841	0.463423	0.03164	0.347069	0.00577005	0.444078	0.382679	0.0132468	1.64486e-07	0.0869267	0.312977	0.0676986	0.197347	0.287199	0.316921
0.313306	0.109676	0.638671	0.231909	0.308082	0.285301	0.181771	0.00280917	0.47222	0.425209	0.921622	1.15043e-05	0.368518	0.303308	0.0805611	0.0229602	0.4649	0.160517
0.560074	0.00759225	0.296936	0.366968	0.160358	0.372469	0.0213335	0.897087	0.505725	0.00187452	0.7469	0.443728	0.416327	0.327366	0.0894511	7.70508e-05	0.208111	0.0943087
0.270897	0.109105	0.541862	0.219164	0.610101	0.0134116	0.000154235	0.0657099	0.980853	0.0119242	0.0525231	0.169396	0.415707	0.141369	0.495918	0.0790076	0.245323	0.220768
0.66126	0.195296	0.128293	0.139263	0.646002	0.0593891	0.0136445	5.25838e-07	0.588752	0.292483	0.0516262	0.041938	0.459983	0.320652	0.337461	0.127322	0.227614	0.195253
0.519916	0.349852	0.473952	0.340736	0.514497	0.134386	0.760987	0.000496059	0.519224	0.258928	0.532519	0.745778	0.559899	0.193752	0.113171	0.0253776	0.556615	0.338711
0.450612	0.00793626	0.778063	0.234279	0.704167	0.0135715	0.000101753	0.690212	0.336169	0.148263	0.413568	0.449125	0.376436	0.198691	0.147714	0.00941686	0.44338	0.241063
0.347288	0.223139	0.475095	0.437095	0.883282	0.00122024	2.31876e-05	0.000132225	0.445116	0.373136	0.0863969	0.0169237	0.264734	0.479239	0.995788	0.104593	0.267363	0.305246
0.328209	0.210645	0.813372	0.247174	0.49428	0.0162542	0.93979	0.0517032	0.105416	0.171592	0.0396905	0.0232868	0.288064	0.338402	0.104987	0.000187965	0.183745	0.340446
0.358104	0.371185	0.718282	0.647369	0.680654	0.0956604	0.00108398	0.000475797	0.624128	0.323063	0.994056	0.0472605	0.479501	0.458005	0.00162289	0.0215691	0.288454	0.364251
0.812272	0.370507	0.516095	0.167966	0.565196	0.0281451	0.944999	0.000171957	0.572504	0.000847984	0.509808	0.661617	0.462173	0.211455	0.930956	0.528866	0.00748268	0.439392
0.430233	0.699246	0.42613	0.396898	0.469265	0.23499	1.31976e-06	0.000794686	0.45656	0.385092	0.0188797	5.53856e-05	0.657849	0.254262	0.123492	0.253553	0.227979	0.109402
0.643864	0.0750731	0.627875	0.263455	0.40242	0.0193868	1	0.0028585	0.532316	0.439921	0.25041	0.00245952	0.572286	0.389837	0.71168	0.0924725	0.504062	0.355885
0.449465	0.147293	0.794242	0.165396	0.410546	0.0150438	0.929437	0.00391306	0.449147	0.500261	0.014432	0.275192	0.531233	0.410319	0.609363	0.0295453	0.339432	0.368211
0.910799	0.11743	0.317007	0.243747	0.551887	0.0679425	0.000742817	2.89693e-07	0.441895	0.373485	0.0369433	0.00689101	0.471786	0.296843	0.996186	0.0428855	0.548828	0.61493
0.269011	0.479709	0.417829	0.57537	0.392025	0.254389	0.859583	0.0820934	0.541819	0.0186887	0.74981	0.0148363	0.472046	0.367711	0.620332	0.152459	0.375292	0.22722
0.0256466	0.0860299	0.480155	0.496592	0.481215	0.402862	0.0966669	0.00235806	0.59989	0.490264	0.496047	7.90642e-10	0.483656	0.344331	0.0233905	0.0524693	0.627934	0.260515
0.530102	0.299103	0.68139	0.384415	0.651316	0.110304	7.77252e-08	0.0650157	0.446103	0.287537	0.659939	0.00147221	0.638092	0.414575	0.0702041	0.280073	0.403254	0.311632
0.0826005	0.0425526	0.8926	0.262422	0.296663	0.0336913	1.4018e-05	0.000128308	0.175604	0.406088	0.488163	0.336759	0.544952	0.298014	0.62098	0.360943	0.0571723	0.255933
0.492321	0.0221362	0.422389	0.346837	0.293094	0.0717046	0.402348	0.000287534	0.213565	0.812612	0.669362	0.0678971	0.362608	0.371478	0.702218	0.000336034	0.653132	0.40894
0.683282	0.433554	0.514884	0.534501	0.391926	0.0162861	0.63979	0.905556	0.63008	0.344167	0.958648	0.0116757	0.500894	0.125295	0.0284821	0.000450949	0.420879	0.556514
0.422234	0.402416	0.381919	0.426122	0.309719	0.0527456	0.00276415	0.82153	0.581966	0.357063	0.0336022	0.338269	0.661912	0.372386	0.981872	0.0799166	0.293364	0.170315
0.0794682	0.133823	0.273737	0.342455	0.381119	0.000680947	0.629761	1.00861e-07	0.680069	0.0710606	0.430284	0.00152171	0.45708	0.318484	0.821242	0.0955599	0.471953	0.280669
0.4874	0.325872	0.485042	0.193809	0.560497	0.125137	0.9928	8.42873e-05	0.602362	0.285005	0.0381224	0.0154588	0.192415	0.36278	0.752114	0.221973	0.311032	0.171549
0.702206	0.250134	0.403013	0.364252	0.0755068	0.0353682	0.997177	7.85655e-05	0.617689	0.00670179	0.00615007	0.147077	0.383126	0.461858	0.984928	0.169218	0.00337341	0.262631
0.533916	0.211707	0.614295	0.280304	0.478365	0.0216545	0.000895447	0.000281445	0.474534	0.00459846	0.02718	0.040763	0.551894	0.415315	0.464523	0.16762	0.273972	0.464707
0.616613	0.72227	0.484841	0.357783	0.535457	0.133969	0.999432	0.0294115	0.490499	0.285778	0.984947	0.0171808	0.506603	0.329659	0.949713	0.236274	0.520803	0.360425
0.0867909	0.044089	0.528844	0.289077	0.26937	0.142654	0.000200324	0.0136114	0.205266	0.339053	0.190195	0.0437352	0.469605	0.312123	0.0718103	0.141468	0.198621	0.18444
0.147282	0.396476	0.667284	0.252879	0.413819	0.307901	0.140131	0.0358542	0.467373	0.423546	0.390788	0.410405	0.470188	0.385131	0.992437	0.0413263	0.546874	0.144588
0.551928	0.0154682	0.487923	0.554287	0.502023	0.15568	0.834893	3.16598e-07	0.352024	0.292528	0.989192	0.23252	0.62643	0.24692	0.023837	0.00475212	0.245119	0.132167
0.537444	0.127631	0.908283	0.328477	0.353105	0.00686498	0.0255374	0.000917271	0.240543	0.591472	0.554055	3.95735e-05	0.520484	0.431087	0.484318	0.00197116	0.203146	0.32509
0.720993	0.182873	0.76486	0.423756	0.2927	0.0181409	0.00411393	0.00375672	0.462888	0.36232	0.461506	0.000337322	0.517006	0.466321	0.0519149	0.330229	0.318949	0.288458
0.506354	0.181083	0.923194	0.176447	0.485369	0.0632557	0.943466	0.00117108	0.647621	0.00596987	0.00052269	9.813e-07	0.666538	0.247568	0.861221	0.160116	0.136364	0.342689
0.421267	0.0392248	0.786146	0.320663	0.521029	0.00201415	1.29363e-05	0.516087	0.371606	0.317493	0.372158	0.164002	0.354221	0.218191	0.245453	0.000463032	0.336259	0.134494
0.27668	0.253095	0.456593	0.229164	0.604405	0.129134	0.999236	0.473362	0.352084	0.222845	0.282536	7.73636e-05	0.464882	0.483354	0.18716	0.28753	0.154161	0.382235
0.33854	0.208047	0.279364	0.167753	0.483712	0.0168822	0.00147766	7.07667e-06	0.79451	0.0391357	0.0168053	0.000721626	0.472551	0.441059	0.293438	0.0705489	0.423487	0.141922
0.48906	0.299578	0.038833	0.298868	0.383211	0.00834979	0.946512	0.000347059	0.417889	0.262807	0.403948	0.381905	0.433945	0.40563	0.408833	0.10268	0.176038	0.288559
0.368348	0.393315	0.407033	0.249461	0.73842	0.000143662	0.00133961	0.000162837	0.484886	0.1798	0.373786	0.0465034	0.537515	0.431617	0.903979	0.0654713	0.0418149	0.311804
0.342896	0.288423	0.47091	0.317194	0.811222	0.0911949	0.769489	1.66411e-05	0.37796	0.38909	0.0601742	0.00172629	0.730789	0.387443	0.0699791	0.00525226	0.359122	0.212404
0.834761	0.42492	0.493364	0.432637	0.77216	0.000504434	0.99985	0.552891	0.962053	0.460898	0.941632	0.238803	0.454825	0.399624	0.012248	0.256949	0.384719	0.238716
0.277801	0.241082	0.414883	0.0123654	0.391126	0.0466731	0.72695	0.000359754	0.421211	0.354396	0.962822	0.34513	0.46	0.300778	0.052311	0.110236	0.368858	0.215337
0.402435	0.133631	0.822105	0.0194835	0.439601	0.430012	0.978295	6.78801e-05	0.365546	0.33105	0.187343	0.484085	0.664272	0.370419	0.882186	0.348134	0.256327	0.252631
0.384042	0.257325	0.427409	0.289777	0.743616	0.0236207	0.00194845	0.638791	0.622058	0.491451	0.626312	0.315628	0.111745	0.437763	0.311932	0.000122447	0.147035	0.0200418
0.329501	0.335214	0.57254	0.101344	0.843418	0.462515	0.0485018	0.544158	0.437015	0.341707	0.365719	0.246051	0.546123	0.261024	0.609363	0.0649056	0.427786	0.314704
0.354015	0.392806	0.491664	0.153531	0.394864	0.00221499	0.727507	0.0920832	0.149558	0.239195	0.356449	3.38874e-08	0.473209	0.271717	0.455716	0.169364	0.117218	0.317903
0.0677965	0.0668502	0.506958	0.290653	0.557051	0.499732	0.787665	0.140238	0.443978	0.302186	0.0453141	0.430327	0.519988	0.352564	0.980277	0.213022	0.278065	0.439465
0.403449	0.0552528	0.30705	0.29717	0.594613	0.146398	0.991226	0.000154221	0.45485	0.387766	0.541094	0.245002	0.710743	0.440209	0.969177	0.323526	0.361393	0.223581
0.648843	0.0260038	0.420548	0.112054	0.51181	0.0054055	0.72547	1.14296e-05	0.394488	0.329756	0.000333127	4.82198e-05	0.498924	0.290969	0.0436844	0.00734664	0.430774	0.283024
0.578193	0.296812	0.560942	0.0657574	0.750154	0.00243769	3.23231e-07	0.172484	0.336981	0.426166	0.850288	0.124043	0.506277	0.399806	0.937635	0.129424	0.256306	0.204467
0.88245	0.236947	0.4734	0.243394	0.342479	0.254138	0.997828	0.000535983	0.427497	0.372237	0.0458831	0.124927	0.578767	0.356303	0.330936	0.0180589	0.175024	0.39221
0.208527	0.175657	0.604124	0.320945	0.518638	0.0817276	0.000283999	1.10702e-05	0.492366	0.330833	0.479187	7.20277e-05	0.469087	0.110037	0.951836	0.0788824	0.428278	0.196522
0.449541	0.188463	0.501116	0.281908	0.671794	0.012189	0.933417	0.772658	0.417695	0.398959	0.282983	0.127644	0.595789	0.26367	0.17049	6.29016e-05	0.0435614	0.0991995
0.407937	0.00740247	0.555152	0.434947	0.694296	0.00522509	0.00104759	0.773833	0.645814	0.361535	0.00628132	0.458458	0.490153	0.411356	0.5208	0.00412128	0.192866	0.378731
0.500282	0.475321	0.545902	0.349298	0.271023	0.462327	0.037987	0.245695	0.153176	0.0291123	0.936343	0.00198543	0.502843	0.471096	0.773025	0.022493	0.763297	0.374323
0.235574	0.15091	0.36797	0.364169	0.592959	0.305981	0.894902	0.00508849	0.371249	0.276751	0.478866	0.0430493	0.317713	0.231588	0.413551	0.0209555	0.210598	0.276004
0.458963	0.298145	0.619837	0.351603	0.00216114	0.070918	0.0286627	0.640492	0.170703	0.440533	0.641525	0.151206	0.766163	0.446807	0.415084	0.107804	0.588123	0.19706
0.489112	0.00850895	0.424906	0.169812	0.975319	0.0483821	0.997537	0.000575759	0.587756	0.403204	0.491244	0.553981	0.810009	0.296282	0.997523	0.258998	0.234999	0.240026
0.755655	0.282393	0.577919	0.0624051	0.0893226	0.187103	0.999955	7.27465e-05	0.606466	0.451679	0.91544	0.0171064	0.566769	0.349703	0.592157	0.000645577	0.315765	0.120866
0.344566	0.208157	0.302241	0.440647	0.595243	0.0136285	0.999994	5.11659e-05	0.415271	0.192027	0.794694	0.00300722	0.503385	0.100344	0.0161281	0.0050495	0.211843	0.378478
0.268561	0.486384	0.532415	0.508833	0.166746	0.133336	0.0030561	9.03032e-06	0.517363	0.180134	0.00104037	0.708642	0.57687	0.45583	0.975645	0.386171	0.19432	0.208996
0.271726	0.35819	0.619734	0.2834	0.996448	0.00100247	0.00108558	0.647771	0.596978	0.0124136	0.0941288	0.421523	0.536553	0.333334	0.0112132	0.102862	0.257023	0.219068
0.542936	0.00354323	0.374453	0.379013	0.202307	0.02665	0.00128439	0.0054633	0.932127	0.4304	0.450937	0.0558978	0.504702	0.0938109	0.727067	0.00614854	0.166553	0.222981
0.33253	0.123161	0.341511	0.530701	0.204745	3.50606e-05	0.753782	0.00416539	0.970905	0.162483	0.0106929	0.172721	0.526863	0.161265	0.262242	0.408017	0.448593	0.335836
0.286357	0.175695	0.566949	0.400941	0.33788	0.0868825	0.72927	0.391358	0.666747	0.364178	0.260276	0.275056	0.436831	0.213617	0.994894	2.44252e-06	0.124732	0.243384
0.186198	0.153105	0.54563	0.208001	0.830608	0.297526	0.980877	0.956262	0.569707	0.340956	0.141994	0.388687	0.453703	0.271469	0.923595	0.000985353	0.377464	0.224805
0.653124	0.167231	0.390774	0.575469	0.422504	0.0560158	0.99981	0.991767	0.822601	0.328589	0.679356	0.177766	0.512301	0.381437	0.070382	0.232696	0.639935	0.135654
0.441792	0.254607	0.0767637	0.469795	0.595697	0.00147624	7.5579e-07	0.00630932	0.415187	0.446433	0.274581	0.0820575	0.597857	0.406628	0.874537	2.21855e-05	0.172668	0.128291
0.469502	0.248575	0.580808	0.0105856	0.385043	0.0265138	0.0490002	0.998101	0.43302	0.287588	1.20427e-05	0.41471	0.448132	0.314979	0.0908716	0.362021	0.103523	0
0.760305	0.00529411	0.464298	0.398826	0.514771	0.0630919	0.164503	0.000326181	0.796407	0.412538	0.728259	1.35538e-05	0.338849	0.505852	0.0531016	0.125897	0.354765	0.198936
0.416622	0.280936	0.482752	0.311819	0.358229	0.158039	0.655885	0.903879	0.108839	0.247264	0.199879	0.356394	0.467719	0.367141	0.05167	0.0712633	0.50397	0.353833
0.505558	0.0487296	0.430053	0.497883	0.360439	0.108551	0.847378	0.000236802	0.974375	0.307903	0.60799	9.11327e-05	0.680508	0.332752	0.460935	0.0832985	0.270777	0.349941
0.519353	0.0240163	0.57961	0.237629	0.841889	0.0272434	0.980078	0.0137335	0.994473	0.32337	4.63937e-05	0.216787	0.359086	0.331702	0.495568	0.0343244	0.358467	0.697431
0.453295	0.0504352	0.378273	0.113621	0.197701	0.199316	0.934699	0.000693803	0.484881	0.0617886	0.772354	0.127397	0.47449	0.377289	0.938197	0.000282186	0.12598	0.28192
0.694166	0.205979	0.676709	0.353729	0.335782	0.0265482	6.788e-07	0.000575082	0.497048	0.362153	0.937661	0.227584	0.898568	0.34197	0.462183	0.0682305	0.0708807	0.180601
0.756815	0.332845	0.571568	0.316685	0.669949	0.197705	0.925315	5.4477e-07	0.499035	0.073556	0.58157	0.291716	0.619379	0.0542736	0.273783	0.00073105	0.104967	0.224966
0.252075	0.250445	0.339306	0.271	0.9545	0.210872	0.996098	3.85735e-05	0.6734	0.0799817	0.859085	0.00162483	0.198052	0.482793	0.517597	0.147138	0.572328	0.245322
0.531424	0.145958	0.610875	0.44328	0.803733	0.22221	0.786253	0.0310851	0.147951	0.434099	0.869115	0.209183	0.426396	0.361973	0.00508267	4.99173e-05	0.462571	0.246978
0.375889	0.238735	0.345975	0.207808	0.0164918	0.0218043	0.997532	0.794355	0.549491	0.111595	0.0447737	0.285618	0.577022	0.463442	0.362633	0.198629	0.0144194	0.261732
0.239789	0.193074	0.640574	0.580946	0.263813	0.0800357	0.999608	0.974327	0.301878	0.463767	0.00992923	0.036266	0.374279	0.258838	0.422398	0.168402	0.342104	0.324473
0.921788	0.152112	0.532722	0.371186	0.870962	0.0103021	2.47809e-06	0.0361496	0.366393	0.0357994	0.0101587	0.122478	0.558299	0.293195	0.325794	0.00401344	0.0626542	0.177634
0.204129	0.299078	0.464122	0.201061	0.902329	0.0949809	0.20009	0.0128852	0.528041	0.278686	0.570165	0.00143583	0.397414	0.11334	0.0996373	0.00765637	0.306169	0.574367
0.633172	0.164894	0.400704	0.248811	0.11662	0.0542336	0.00542754	8.21738e-06	0.982712	0.23264	0.00832437	0.117799	0.199921	0.334725	0.145256	0.000353395	0.221167	0.355891
0.753294	0.338141	0.619584	0.251735	0.133675	0.0147243	0.665081	0.295873	0.701155	0.392131	0.0316164	0.135037	0.449478	0.329041	0.172063	0.010673	0.349854	0.225348
0.440093	0.0531942	0.431537	0.408337	0.430367	0.216976	0.999983	7.11705e-05	0.599957	0.00354055	0.980094	0.0198745	0.746668	0.281195	0.80486	0.0103781	0.298766	0.131815
0.647408	0.115498	0.57206	0.14132	0.759118	0.388756	0.365443	0.000546241	0.687123	0.445581	0.00479664	0.456117	0.665151	0.306809	0.999949	0.0281223	0.197885	0.0874943
0.318964	0.215937	0.588824	0.0389917	0.516216	0.071148	0.346228	0.00257113	0.680958	0.504944	0.603504	0.0334975	0.430299	0.349615	0.259049	0.0477654	0.1159	0.188411
0.432096	0.199045	0.708324	0.0710062	0.0236854	0.0648105	0.401423	1.586e-05	0.142175	0.399428	0.500642	1.9761e-05	0.636609	0.369305	0.572337	0.169473	0.0885332	0.147374
0.328733	0.305246	0.875745	0.375397	0.345016	0.0258489	0.999999	1.94899e-05	0.504268	0.210129	0.099466	0.00055385	0.106452	0.365837	0.352945	5.34674e-06	0.342072	0.317278
0.606053	0.36864	0.498271	0.134103	0.807829	0.0349331	0.994486	0.0114429	0.208626	0.428493	0.148113	0.212033	0.417144	0.276461	0.840691	0.0622336	0.379247	0.0614894
0.538206	0.286816	0.332503	0.238366	0.436816	0.11133	6.53712e-05	0.00370519	0.792989	0.00965941	0.585692	0.179871	0.458114	0.33163	0.184053	2.03707e-06	0.368321	0.179802
0.427404	0.0659707	0.444271	0.134959	0.429587	0.00258975	1	0.605359	0.600839	0.353075	0.225841	0.198078	0.438054	0.213637	0.992136	0.0385492	0.170725	0.562816
0.59615	0.00584993	0.603919	0.49566	0.403245	0.000260143	0.000589903	0.346036	0.178253	0.154867	0.590058	0.041644	0.741967	0.383329	0.674537	0.308522	0.0997724	0.295066
0.333559	0.375578	0.589921	0.487814	0.32243	0.141985	6.44165e-05	0.00139415	0.843771	0.341286	0.00513939	0.0810146	0.508666	0.332952	0.104844	0.122712	0.672516	0.209635
0.399036	0.447722	0.383021	0.138805	0.397196	0.260184	0.000336072	0.996715	0.391395	0.495462	0.438011	0.0182515	0.47362	0.171723	0.985806	0.151627	0.226986	0.515108
0.775585	0.13631	0.469316	0.43358	0.0108455	0.000646628	0.982115	0.000527588	0.104983	0.0595317	0.514841	0.0378727	0.79147	0.21947	0.415311	0.193029	0.265844	0.288783
0.265109	0.122158	0.588141	0.441858	0.384808	0.441958	0.998878	0.00865851	0.517676	0.35268	0.0752481	0.044519	0.690887	0.454391	0.966877	0.000538181	0.400543	0.171646
0.441479	0.109086	0.603667	0.450546	0.548467	0.031861	0.999986	8.90655e-07	0.451426	0.381842	0.428345	1.21091e-05	0.2016	0.416635	0.752406	0.288849	0.293789	0.292185
0.503404	0.297356	0.365813	0.321608	0.850258	0.08869	0.998409	1.09003e-05	0.439706	0.235662	0.0544763	6.33213e-05	0.469048	0.233788	0.180363	0.563911	0.259811	0.220296
0.399629	0.006847	0.277207	0.39075	0.366492	0.0721635	0.999977	0.00658921	0.299139	0.401002	0.0953351	0.0174526	0.464452	0.301213	0.997574	0.372536	0.0734286	0.186767
0.659695	0.112581	0.655224	0.420239	0.997356	0.225465	0.000916609	6.5027e-05	0.590855	0.196039	0.573899	0.00170306	0.509502	0.440854	0.074986	0.113252	0.0734264	0.334511
0.43492	0.570204	0.529964	0.305666	0.364989	0.418034	0.99989	0.748366	0.505418	0.419897	0.260876	0.0890323	0.203046	0.188657	0.977264	5.1481e-06	0.33386	0.279428
0.522469	0.141605	0.494807	0.0385619	0.521949	0.0344047	0.998272	0.090769	0.9897	0.220028	0.904617	0.0411113	0.595882	0.325473	0.413931	0.118633	0.0597233	0.248152
0.332717	0.177936	0.142331	0.315779	0.150633	0.00554273	0.999588	0.527497	0.193618	0.125662	0.710769	0.1151	0.605793	0.363189	0.0417161	0.107777	0.258136	0.397339
0.317804	0.0403331	0.646704	0.291305	0.998629	0.0125406	0.662614	2.90683e-05	0.464973	0.385104	2.15252e-07	0.00533613	0.493129	0.165769	0.999748	0.269505	0.435402	0.35477
0.47599	0.352106	0.456228	0.340736	0.00835287	0.142292	0.0161009	0.151742	0.977214	0.448174	0.0197228	0.0174561	0.437507	0.22218	0.353357	0.0311538	0.287701	0.290982
0.302123	0.0078994	0.490328	0.119844	0.867114	0.255264	0.0176918	0.00243139	0.498446	0.413568	0.407401	0.0482906	0.54403	0.321442	0.984266	0.00342169	0.344439	0.470982
0.671549	0.33531	0.388402	0.150678	0.49883	0.79039	0.999191	0.357873	0.510793	0.506361	0.489602	0.0992302	0.751915	0.344548	0.415416	0.0300019	0.600747	0.170781
0.590979	0.200412	0.64226	0.526525	0.731839	0.0229496	0.998363	5.50942e-06	0.577981	0.390086	0.386883	0.438869	0.461791	0.366691	0.840237	0.00184583	0.3874	0.307421
0.511307	0.222274	0.299756	0.467123	0.794892	0.203227	0.200541	0.999443	0.345848	0.262927	0.0638447	0.224248	0.244991	0.62356	0.27625	0.0219861	0.0915357	0.318797
0.285984	0.221967	0.614081	0.386146	0.402088	0.231124	0.799361	0.000113378	0.600057	0.00192636	0.00529095	0.126621	0.341561	0.538406	0.982936	0.00396008	0.54272	0.225443
0.77148	0.0245471	0.355367	0.0486724	0.914472	0.234095	0.0745011	0.854336	0.519378	0.350159	0.0840207	0.415847	0.607214	0.322841	0.816183	0.213995	0.437417	0.361714
0.0804257	0.388888	0.293223	0.077819	0.515481	0.0968345	0.99711	0.0106201	0.441455	0.431162	0.433311	0.140707	0.3883	0.261851	0.693316	0.0135405	0.281798	0.330081
0.680631	0.13121	0.635891	0.310175	0.468449	0.0241185	0.686208	1.83357e-05	0.384831	0.406784	0.442187	0.149087	0.40591	0.229107	0.612986	0.0309809	0.426554	0.216038
0.517237	0.0242175	0.365813	0.423756	0.555728	0.0196392	0.928663	0.138499	0.491112	0.31447	0.00149791	0.309174	0.579278	0.229757	0.546507	0.0138142	0.293458	0.621711
0.44045	0.188106	0.444401	0.201431	0.367118	0.0975429	1.00264e-05	0.0411529	0.397669	0.46908	0.358947	0.000196977	0.68824	0.474513	0.23017	0.0640763	0.205005	0.291054
0.486922	0.0822523	0.33315	0.171233	0.436155	0.0882538	0.00600365	1.95299e-06	0.546266	0.0177727	0.0030851	0.0277874	0.454635	0.316509	0.542972	0.237854	0.309638	0.121343
0.784336	0.42817	0.502823	0.341466	0.342848	0.210963	1	0.000742723	0.825421	0.475771	0.00300083	0.256884	0.374426	0.325129	0.303319	0.192105	0.481143	0.329352
0.940186	0.0558902	0.105805	0.325271	0.351857	0.415836	0.999999	4.80285e-05	0.521488	0.337815	0.471556	0.273374	0.332421	0.244858	0.639582	0.00360699	0.216424	0.331035
0.266435	0.0744443	0.891991	0.153249	0.0548485	0.218265	0.990676	0.212776	0.336417	0.288872	0.733504	0.350097	0.37364	0.338814	0.0821651	0.0845311	0.354801	0.360805
0.186591	0.20946	0.447296	0.00944362	0.206544	0.070038	0.00104412	5.07028e-07	0.852367	0.271866	0.999273	3.51785e-07	0.513841	0.340739	0.711769	0.190223	0.371748	0.288602
0.278933	0.252575	0.725629	0.526716	0.376003	0.044025	0.981924	5.43549e-05	0.414543	0.52279	0.989846	0.0238665	0.609064	0.368282	0.17708	0.060153	0.294484	0.192695
0.59732	0.276358	0.709551	0.308698	0.862108	0.0774791	7.31818e-06	0.483901	0.479165	0.1611	0.05947	0.159271	0.291887	0.350867	0.135423	0.131325	0.254433	0.157269
0.642616	0.45658	0.529554	0.376446	0.380028	0.227153	0.00155672	0.000286182	0.499849	0.0268948	0.0140917	0.378854	0.430107	0.349788	0.277104	2.10149e-05	0.494614	0.298076
0.393243	0.0857418	0.477944	0.309528	0.0875295	0.279809	0.492537	6.91667e-05	0.363595	0.324093	0.112888	0.397891	0.407154	0.370971	0.0724067	0.0271773	0.442335	0.199612
0.0947807	0.429873	0.356719	0.292864	0.506352	0.0150316	0.114162	3.46444e-07	0.545762	0.612932	0.958313	0.00126319	0.484714	0.213747	0.180721	7.76255e-06	0.340942	0.335086
0.514452	0.0596175	0.47348	0.407848	0.412636	0.0685888	3.457e-06	0.010227	0.171463	0.236372	0.558587	0.00916998	0.334429	0.505761	0.760632	0.255135	0.657382	0.151166
0.375711	0.474661	0.446665	0.445513	0.552378	0.112528	0.999637	1.29319e-05	0.365974	0.365634	0.986539	0.499907	0.382377	0.428887	0.39024	0.0429903	0.266152	0.26764
0.472143	0.346465	0.60816	0.0863331	0.372014	0.2918	0.0342136	1.40972e-07	0.491596	0.292636	0.732036	0.379421	0.289732	0.342806	0.742193	0.00253029	0.164436	0.131607
0.455025	0.345236	0.54173	0.28627	0.346197	0.00921525	0.00517069	0.945773	0.56495	0.391181	0.469287	0.293122	0.581847	0.259974	0.330759	0.27607	0.23886	0.20318
0.262843	0.0618167	0.850911	0.105713	0.768715	0.193078	0.0228492	8.37165e-06	0.354125	0.552973	0.871824	0.232978	0.521172	0.421059	0.165217	0.155738	0.300721	0.203728
0.400302	0.839267	0.568746	0.194043	0.526755	0.0776027	0.000161924	0.00992187	0.163757	0.4842	0.357112	0.0199741	0.513224	0.215794	0.377745	0.272958	0.355706	0.433719
0.388299	0.162157	0.34967	0.301237	0.331346	0.42642	0.996302	0.00384947	0.575955	0.37313	1	0.000228665	0.356627	0.362649	0.970474	0.14742	0.102426	0.258894
0.283956	0.193304	0.397338	0.370091	0.173362	0.305479	0.988637	8.68797e-06	0.281049	0.0816808	0.596462	0.549227	0.421417	0.208548	0.460866	0.005237	0.330432	0.138353
0.414182	0.0723656	0.598567	0.0704532	0.330597	0.0125433	0.999796	0.665096	0.208149	0.415988	0.0478321	0.00981655	0.599184	0.175394	0.23428	0.111019	0.182054	0.225367
0.437014	0.12977	0.474963	0.381431	0.14277	0.0974235	0.999997	0.0976339	0.449015	0.258713	0.915032	0.00416916	0.390877	0.348245	0.445415	0.14924	0.418046	0.229248
0.391805	0.233033	0.0939342	0.39444	0.24295	0.0517178	0.00218763	0.000755011	0.438967	0.0122711	0.0280631	0.00992236	0.555081	0.335351	0.500323	0.123831	0.349103	0.296983
0.391097	0.0391068	0.432084	0.10016	0.262014	0.0420786	3.32408e-05	1.68229e-06	0.692019	0.771945	0.681061	0.120348	0.561005	0.515816	0.17555	0.0736975	0.317301	0.340768
0.469187	0.403305	0.461316	0.212834	0.80973	0.128154	0.249652	0.999999	0.39396	0.371197	0.025266	0.100221	0.208879	0.373777	0.360759	0.00071764	0.0947065	0.34955
0.602692	0.259052	0.5357	0.497883	0.65274	0.0148458	0.000109053	0.00123738	0.598892	0.366609	0.115177	0.0001622	0.52823	0.443121	0.271128	0.0508155	0.426379	0.277943
0.219678	0.258288	0.518218	0.21194	0.830905	0.043227	0.958883	0.43935	0.268904	0.280185	9.56537e-05	0.200363	0.425334	0.263177	0.80498	1.02377e-06	0.0933828	0.593451
0.589614	0.328986	0.562867	0.0234669	0.904529	0.00792908	0.00294896	1.14244e-05	0.541253	0.559091	0.656099	0.506742	0.289732	0.351009	0.228346	1.70328e-06	0.359181	0.242433
0.662435	0.0131551	0.360861	0.47205	0.674201	0.244631	8.49823e-07	0.0498049	0.454756	0.374606	0.272492	0.0216261	0.450988	0.0917776	0.854536	0.0853784	0.334179	0.345678
0.372491	0.357192	0.519402	0.430515	0.291643	0.0794864	0.093838	0.0424354	0.995767	0.344146	0.184385	0.0129105	0.463571	0.371128	0.0616622	0.000148059	0.278052	0.144634
0.377768	0.295271	0.794456	0.274329	0.356853	0.307297	0.998876	0.0022065	0.722794	0.381385	0.41398	0.00293286	0.512536	0.223929	0.542125	0.00830425	0.21912	0.28674
0.549713	0.141003	0.628854	0.462777	0.409859	0.0544132	0.76179	0.000617592	0.991344	0.201081	0.431764	0.373602	0.290761	0.598125	0.547906	0.297058	0.47685	0.493811
0.744504	0.436592	0.898102	0.440043	0.354663	0.121796	0.182857	0.939741	0.43842	0.367561	0.00117797	1.48709e-08	0.510324	0.170531	0.412465	0.0408651	0.417992	0.316483
0.1246	0.231399	0.345625	0.318582	0.33241	0.30095	0.198559	0.0017646	0.494811	0.299126	0.44928	0.00018379	0.741774	0.465288	0.999967	0.270132	0.656262	0.312409
0.449714	0.242839	0.662683	0.41926	0.654924	0.0497319	0.995861	2.86685e-05	0.991092	0.421527	0.610391	0.141676	0.761399	0.370235	0.08152	0.05607	0.105056	0.094585
0.33141	0.149051	0.600673	0.394303	0.419869	0.2516	0.0722048	7.6084e-06	0.419072	0.22354	0.822708	0.158816	0.710296	0.455339	0.0200855	0.212496	0.389328	0.14698
0.261238	0.39191	0.482054	0.0841027	0.460931	0.159964	0.00116106	0.00942418	0.672598	0.417274	0.185664	0.153937	0.61518	0.384242	0.953739	0.0131508	0.402944	0.466872
0.968412	0.0867238	0.665308	0.230401	0.445235	0.456719	0.999914	0.0102193	0.437416	0.166942	0.190392	0.0517109	0.452315	0.357874	0.203825	0.0431239	0.432526	0.315308
0.264267	0.0463364	0.603666	0.223406	0.421742	0.0174335	0.985314	0.60075	0.682882	0.453098	0.0628089	0.288132	0.471758	0.350068	0.0949606	0.117487	0.273266	0.230944
0.347258	0.210148	0.503964	0.434947	0.185845	0.0106825	0.000373969	0.878716	0.573332	0.335155	0.617504	0.0905955	0.757165	0.155882	0.285852	0.00192562	0.0610051	0.161127
0.359137	0.362982	0.649282	0.456477	0.643359	0.00346483	3.14585e-05	0.318773	0.745529	0.286053	0.013752	1.93122e-05	0.457784	0.344608	0.620706	0.338175	0.00374548	0.260246
0.4027	0.32459	0.679982	0.420781	0.408874	0.00030516	0.00189595	0.963136	0.673016	0.586456	0.0986677	0.491293	0.36621	0.608234	0.00904577	0.0852847	0.413942	0.30343
0.276741	0.173045	0.522329	0.104419	0.631125	0.0983387	5.96943e-06	0.00266763	0.286204	0.33617	0.559125	0.00784862	0.328065	0.429927	0.140685	0.0677035	0.205141	0.491008
0.370539	0.306703	0.321489	0.324356	0.45264	0.0598082	0.0335025	0.0333884	0.483051	0.447527	0.731489	0.00177074	0.473768	0.358862	0.0289083	2.21855e-05	0.497175	0.174079
0.24346	0.279363	0.278786	0.169887	0.474714	0.0786404	0.00155217	0.0601481	0.572906	0.264793	0.081157	0.0998952	0.453609	0.322227	0.418727	7.43348e-05	0.311024	0.521152
0.35003	0.385259	0.557647	0.437095	0.647069	0.0328399	3.45383e-07	3.99836e-07	0.141047	0.630125	0.925958	0.495296	0.61279	0.32415	0.272137	0.125613	0.829904	0.143956
0.406104	0.165519	0.599986	0.220944	0.364283	0.283104	1.46996e-06	4.42996e-05	0.95762	0.546269	0.31905	0.0724498	0.485307	0.370512	0.00221072	0.0369479	0.840337	0.440457
0.374463	0.0766018	0.871435	0.31785	0.386838	0.192275	0.0359452	0.150064	0.939194	0.261896	0.897859	0.262712	0.481278	0.0889534	0.950062	0.14564	0.303497	0.210871
0.348264	0.300469	0.495278	0.28594	0.396093	0.230949	0.550086	6.13968e-05	0.40049	0.221357	0.521168	0.415871	0.534694	0.366431	0.911348	0.00063432	0.319663	0.208817
0.747341	0.019797	0.591564	0.334967	0.0833606	0.0703202	0.977347	0.0677369	0.410696	0.370446	0.618352	0.124931	0.473712	0.354368	0.992395	0.106577	0.0232148	0.228998
0.24651	0.0125457	0.489443	0.317007	0.513668	0.412874	0.354181	0.000153107	0.54976	0.00118279	0.600083	2.5532e-06	0.50408	0.19772	0.762936	0.0433798	0.444688	0.144455
0.372764	0.136613	0.287543	0.306471	0.652136	0.421756	6.19728e-06	8.60477e-06	0.566724	0.0651062	0.606361	0.0014043	0.768886	0.314912	0.0807214	0.0045483	0.303727	0.0605782
0.190031	0.00842224	0.665831	0.356433	0.472975	0.0338122	0.97855	0.452021	0.417168	0.356218	0.817683	1.53818e-06	0.72007	0.262237	0.120636	0.00390799	0.254275	0.108905
0.762478	0.51889	0.572439	0.146648	0.514781	0.240361	0.998981	0.0488914	0.42223	0.450419	0.00702541	0.508681	0.385457	0.471917	0.742419	0.307195	0.774309	0.365889
0.30753	0.30627	0.380703	0.169713	0.399799	0.00323223	0.92671	4.26731e-05	0.0521364	0.0768038	0.0447982	0.400142	0.519762	0.341276	0.0844348	0.445669	0.468664	0.310089
0.516502	0.0316481	0.403486	0.17725	0.678929	0.307163	0.993394	0.00150318	0.63982	0.48842	0.0735341	0.254799	0.635608	0.205794	0.221027	0.271497	0.0162761	0.0562207
0.379815	0.827109	0.324953	0.394501	0.364929	0.0295937	0.999988	0.00747069	0.689821	0.311877	0.723919	0.322086	0.473486	0.156877	0.0416367	0.0537442	0.378749	0.10157
0.323738	0.405288	0.00591397	0.262397	0.442824	0.0207505	0.00433122	0.365884	0.120649	0.00130807	0.324678	0.178505	0.429052	0.402434	0.0193941	0.0599631	0.445847	0.273652
0.623905	0.336142	0.506315	0.0674461	0.299458	0.175686	0.00176811	0.000154334	0.45778	0.452145	0.792972	0.297254	0.427101	0.426542	0.151874	1.92804e-05	0.223325	0.415319
0.738743	0.0114179	0	0.0123278	0.602086	2.76808e-05	0.396119	0.66895	0.91746	0.320175	0.724356	0.416122	0.711444	0.329358	0.41952	0.00529137	0.488232	0.263539
0.425319	0.294109	0.451317	0.116853	0.634241	0.199154	0.871656	0.245774	0.693853	0.354956	0.966597	0.00170306	0.480317	0.369305	0.012862	0.0283512	0.776258	0.0955668
0.425883	0.178451	0.555698	0.0743481	0.31794	0.0252144	0.979409	2.78051e-05	0.473161	0.107754	0.511912	0.00465155	0.935946	0.230402	0.24417	0.0152012	0.391672	0.369819
0.875237	0.50161	0.568435	0.495585	0.412599	0.0505344	0.364082	0.0105996	0.440468	0.247614	0.00977992	0.00105739	0.782	0.259472	0.999003	0.252312	0.339137	0.436815
0.25596	0.243343	0.347891	0.459684	0.399506	0.606626	1.96651e-05	1.10676e-06	0.480544	0.383464	0.00630859	0.015264	0.695058	0.347602	0.670516	0.180244	0.715315	0.244412
0.272959	0.360047	0.621459	0.238783	0.491123	0.136282	0.000236472	2.05232e-05	0.455831	0.205768	0.491244	0.376663	0.451489	0.227665	0.209144	0.38	0.193124	0.346534
0.613686	0.291684	0.396567	0.271	0.71512	0.0528575	0.931019	5.34233e-06	0.298259	0.0871286	0.0140676	0.153115	0.508477	0.421042	0.999927	0.0242277	0.0540483	0.377969
0.171284	0.684663	0.265616	0.42558	0.361796	0.36908	0.983291	0.000383042	0.45263	0.30552	0.296094	0.593555	0.488596	0.467749	0.124353	0.00435357	0.752436	0.288671
0.541517	0.433994	0.482372	0.267668	0.774826	0.33707	0.98845	6.75666e-07	0.52025	0.442566	0.954287	0.00390076	0.451514	0.272468	0.723787	0.0259352	0.428202	0.166261
0.447228	0.55514	0.201615	0.505949	0.307025	0.225273	0.992616	0.00297817	0.494317	0.212965	0.243063	0.0444929	0.415036	0.474807	0.0500479	0.268549	0.379456	0.21306
0.309818	0.025648	0.548055	0.262704	0.490792	0.257953	0.999605	2.1964e-07	0.739726	0.131591	0.290597	0.0487299	0.596063	0.386449	0.778397	0.120914	0.540178	0.508557
0.471532	0.0612738	0.471067	0.47801	0.933963	0.0114241	0.499531	0.000516104	0.564971	0.556834	0.339229	0.00156732	0.745269	0.263283	0.979941	0.120005	0.0750848	0.270169
0.539488	0.387463	0.775553	0.153249	0.454921	0.102819	0.000383222	0.0121111	0.466167	0.297391	0.623499	0.316109	0.558075	0.300241	0.0676871	0.000217651	0.479485	0.513258
0.846559	0.269644	0.3158	0.106029	0.506548	0.11055	0.0314221	7.60334e-06	0.362248	0.259522	0.05947	0.00114108	0.562055	0.285574	0.00251276	0.110823	0.0772712	0.224292
0.676871	0.180759	0.558861	0.4078	0.440521	0.0492426	0.871043	0.11657	0.994011	0.432818	0.379295	1.47564e-05	0.419886	0.36475	0.519299	0.0069816	0.483937	0.223569
0.631953	0.304984	0.305842	0.348613	0.417726	0.1892	0.999964	0.595511	0.828963	0.384719	0.0684019	0.956252	0.439196	0.335501	0.691559	0.0127627	0.507936	0.280576
0.833833	0.246731	0.597131	0.269771	0.761565	0.0203008	0.999313	2.265e-06	0.473648	0.388781	0.867941	0.00465155	0.550228	0.454871	0.0794172	0.263815	0.120917	0.273688
0.630699	0.138429	0.643373	0.190961	0.784275	0.143213	0.987584	4.11547e-05	0.457339	0.427359	0.000918766	0.333869	0.486003	0.421997	0.0188647	0.0265934	0.0977981	0.258752
0.503857	0.426002	0.695004	0.54878	0.466544	0.379207	0.999738	0.987473	0.174269	0.220991	0.0512797	0.0128822	0.596256	0.289843	0.0414447	0.301519	0.365143	0.142975
0.473339	0.363773	0.458664	0.211167	0.330639	0.120794	0.0252321	0.00314478	0.410637	0.446359	0.0838493	0.692366	0.584407	0.22813	0.0830095	0.741077	0.148546	0.142424
0.447556	0.235675	0.582138	0.342926	0.815525	0.000286852	0.00685306	0.000521643	0.4401	0.111427	0.289644	0.20423	0.370555	0.372181	0.00251276	4.25157e-05	0.0590218	0.352743
0.49516	0.0340039	0.731455	0.0741553	0.435078	0.0332856	0.995616	2.11667e-05	0.541745	0.227757	0.0900243	0.533208	0.324997	0.322783	0.979105	0.215519	0.102038	0.473381
0.477744	0.181595	0.360882	0.529219	0.614257	0.021324	0.263592	0.303285	0.561543	0.373913	0.238428	0.0321226	0.456665	0.30769	0.0398875	0.0240766	0.291302	0.271127
0.78431	0.6169	0.516778	0.383619	0.726987	0.106474	0.00140039	1.4514e-06	0.838299	0.117121	0.424446	0.125136	0.773746	0.183794	0.559615	0.678383	0.515151	0.238163
0.52201	0.409401	0.544323	0.133373	0.782027	0.141966	0.0192241	5.42301e-07	0.562036	0.310296	0.153451	0.0100985	0.460444	0.380723	0.593569	0.0502374	0.00980001	0.379519
0.657974	0.343625	0.441727	0.0693956	0.377321	0.0236426	3.88493e-08	0.0099933	0.626609	0.469004	0.342599	7.8653e-07	0.459459	0.382437	0.276176	0.136594	0.438881	0.403833
0.427541	0.338263	0.510325	0.411568	0.518521	0.0607912	0.994311	0.0126624	0.941835	0.259071	0.319457	0.00244293	0.863003	0.360721	0.374372	0.0157423	0.347264	0.284059
0.167323	0.359135	0.500164	0.316932	0.522711	0.0808153	0.501227	0.0391608	0.587121	0.304609	0.000582675	0.225648	0.56884	0.144427	0.536951	0.52529	0.261527	0.279977
0.37171	0.293651	0.636695	0.262704	0.65017	0.021077	0.931019	0.96664	0.553526	0.00803704	0.557351	0.00223233	0.417626	0.442556	0.00974865	0.075657	0.117093	0.585471
0.437804	0.102278	0.599261	0.0476846	0.346484	0.119836	0.972174	3.92671e-07	0.122591	0.56345	0.861639	0.071839	0.855582	0.151912	0.0611034	0.0053162	0.269257	0.255482
0.386834	0.316514	0.761763	0.224361	0.959148	0.0714188	0.0574811	0.00158243	0.285823	0.00186106	0.138796	0.439085	0.458218	0.441773	0.996684	0.270108	0.363544	0.195397
0.89805	0.225317	0.470313	0.230233	0.40113	0.0535007	0.172223	5.31885e-08	0.429568	0.382063	0.0173469	3.50608e-05	0.43353	0.0224717	0.124603	0.0180938	0.114506	0.245186
0.819707	0.431201	0.478633	0.342926	0.644375	0.103746	0.979998	0.00401341	0.670576	0.291782	0.0140317	0.423536	0.432986	0.132081	0.250489	1.3832e-05	0.302923	0.343105
0.254751	0.0729611	0.663604	0.325563	0.3572	0.0181031	0.984797	6.39013e-05	0.325365	0.0921589	0.0198108	0.107997	0.325139	0.290229	0.125372	0.0559046	0.39427	0.308395
0.492043	0.022105	0.487944	0.24932	0.462037	0.0524863	0.000123568	0.00250786	0.631015	0.182291	0.974183	0.059696	0.511848	0.384156	0.608839	0.008238	0.180185	0.164939
0.52025	0.129115	0.526686	0.345704	0.828054	0.210863	0.999813	0.161306	0.587105	0.280014	0.367994	0.000250011	0.475078	0.391779	0.618315	0.170264	0.171141	0.0662136
0.512323	0.373872	0.371345	0.475764	0.296024	0.111708	0.251614	1.03825e-05	0.605636	0.478431	0.0452536	0.248122	0.475583	0.304259	0.981473	0.142698	0.205825	0.254984
0.368743	0.132631	0.437106	0.0103982	0.342652	0.0649582	6.32073e-05	0.0293166	0.456	0.493217	0.223272	0.211206	0.432021	0.312255	0.0646422	0.0298501	0.438648	0.213026
0.6378	0.0594859	0.359578	0.344015	0.268145	0.174105	6.00679e-05	0.416842	0.436967	0.43766	0.0458831	0.37369	0.729629	0.104941	0.515732	0.0872428	0.278954	0.250183
0.57971	0.294067	0.677644	0.39804	0.630592	0.0214558	0.000347575	0.018694	0.441557	0.00506145	0.00282338	0.00163261	0.715704	0.427685	0.693348	0.0764264	0.253704	0.368267
0.474605	0.451117	0.553604	0.272482	0.635347	0.0110018	0.791812	0.956568	0.429541	0.404324	0.365961	8.24259e-05	0.478592	0.463685	0.444394	0.00358569	0.410014	0.274717
0.327783	0.348485	0.48863	0.489806	0.969427	0.11985	0.0205494	7.72291e-05	0.445748	0.230069	0.97018	0.507467	0.444764	0.380274	0.687436	0.276051	0.294942	0.373386
0.692798	0.103005	0.576933	0.173535	0.0363509	0.181978	0.989895	0.435671	0.523419	0.0618725	0.104582	0.00472369	0.369884	0.3644	0.943098	0.291081	0.226779	0.369785
0.352044	0.221008	0.539846	0.334388	0.333897	0.0308645	0.999919	0.0711745	0.746623	0.48278	0.261332	0.018382	0.29856	0.449284	0.962234	0.145885	0.205728	0.337339
0.173932	0.343442	0.395199	0.370572	0.915895	0.0561358	0.113666	0.534333	0.558808	0.427718	0.10992	0.500364	0.446386	0.468759	0.0432409	0.280073	0.670081	0.250759
0.95186	0.13151	0.404938	0.546036	0.242239	0.0393724	0.118955	0.00383379	0.493264	0.327348	0.0846901	0.16964	0.541672	0.428066	0.0790543	0.17258	0.211743	0.389814
0.211143	0.155839	0.398221	0.222029	0.157053	0.185801	0.173744	0.000804279	0.414437	0.406281	0.17012	0.0311628	0.39997	0.40318	0.0644029	1.44401e-05	0.418672	0.492797
0.354429	0.184373	0.477688	0.196348	0.467261	0.0589265	5.81677e-05	0.0522592	0.495228	0.163537	0.0969118	0.323891	0.466377	0.653899	0.011931	0.0374014	0.24895	0.553296
0.51701	0.0965351	0.514858	0.0997031	0.398727	0.000212144	0.874836	1.03245e-07	0.709042	0.357989	0.962256	0.635034	0.491508	0.35152	0.461983	0.037813	0.623118	0.269363
0.916215	0.245662	0.746571	0.480184	0.416997	0.250308	0.997483	0.00012537	0.538943	0.514347	0.186077	0.249843	0.48262	0.25069	0.0482308	0.134841	0.176595	0.0747596
0.446206	0.096533	0.473969	0.454743	0.772152	0.218796	0.97973	4.61203e-06	0.824768	0.306951	0.572351	0.307028	0.334007	0.299784	0.263737	0.0213431	0.153069	0.414164
0.483249	0.37149	0.218994	0.377343	0.351199	0.00504763	3.32949e-05	7.5128e-05	0.926835	0.231815	0.0317446	0.570817	0.568511	0.407132	0.311587	0.0803789	0.144775	0.365905
0.16505	0.494403	0.478812	0.289777	0.487145	0.0135152	0.0330425	0.00129856	0.393172	0.384692	0.00252564	0.0503748	0.437297	0.2878	0.00715769	0.0265898	0.382545	0.200271
0.324422	0.0133006	0.553059	0.0106135	0.351073	0.348633	0.121103	1.90569e-05	0.928736	0.503831	0.607635	0.458652	0.372239	0.343016	0.890408	0.135756	0.14322	0.0509619
0.168945	0.407916	0.488386	0.187047	0.568029	0.114971	0.00201794	0.00204481	0.548286	0.355039	0.147249	0.0470949	0.569577	0.109826	0.469061	0.0800049	0.345022	0.375786
0.342655	0.323579	0.478259	0.454743	0.44524	0.000141567	0.927931	0.0872613	0.495088	0.298966	0.21674	0.335589	0.346259	0.454804	0.196605	0.0483316	0.0327787	0.256871
0.626554	0.119122	0.285934	0.211947	0.867063	0.0463926	0.0274836	0.949577	0.434071	0.466486	0.104127	0.0133976	0.380274	0.112662	0.999735	1.77105e-05	0.221682	0.413384
0.454096	0.321696	0.470809	0.124542	0.583477	0.0425555	0.987125	0.00148349	0.834014	0.406998	0.153531	0.0281563	0.429045	0.363342	0.197196	0.228968	0.352617	0.479622
0.364238	0.00675052	0.464299	0.138408	0.491667	0.000225912	0.000935128	3.31048e-05	0.523293	0.440987	0.522204	6.98691e-07	0.706517	0.359484	0.999956	0.219024	0.501795	0.212908
0.698224	0.106595	0.440375	0.473093	0.291809	0.0994013	0.147997	1.87028e-06	0.100813	0.25464	0.299343	0.0287874	0.589275	0.205914	0.99994	0.00146485	0.186232	0.0888875
0.549844	0.197935	0.54223	0.0427538	0.421634	0.196891	0.999446	0.00117089	0.459276	0.323177	0.822064	0.290486	0.314322	0.201808	0.996998	0.0535327	0.169526	0.21356
0.23042	0.159688	0.45287	0.0507311	0.44128	0.223344	0.998013	2.70876e-06	0.388156	0.302883	0.0388823	0.000545483	0.401333	0.427434	0.288613	0.0696654	0.130266	0.49693
0.31397	0.0396915	0.472726	0.193343	0.426563	0.00204502	0.828344	0.86972	0.48585	0.390777	0.000459334	0.00152094	0.421962	0.340685	0.0616966	0.0398903	0.270445	0.236648
0.384703	0.467256	0.464462	0.13034	0.43437	0.172822	0.999996	0.00055187	0.439775	0.400883	0.614903	0.0572801	0.792188	0.15466	0.0824741	0.0416436	0.289481	0.388947
0.312596	0.221155	0.749289	0.146914	0.413988	0.0937257	8.20618e-07	0.000196673	0.462745	0.236988	0.377237	0.0944292	0.465656	0.387831	0.915183	0.132238	0.449888	0.21938
0.431034	0.0503956	0.579822	0.219508	0.720193	0.0774566	0.0392708	0.190774	0.945245	0.47787	0.955586	0.130578	0.46048	0.198307	0.897172	0.0400396	0.264577	0.223536
0.445412	0.119355	0.46238	0.304817	0.316299	0.166376	0.00315131	3.73409e-05	0.551537	0.116448	0.260086	0.00181541	0.48519	0.211568	0.921707	0.162555	0.0810867	0.103217
0.644853	0.711145	0.449782	0.0557812	0.430932	0.404555	0.00996413	0.864383	0.383217	0.328643	0.751168	4.31735e-11	0.323558	0.0435522	0.067518	0.087479	0.0929714	0.321526
0.467366	0.149177	0.524471	0.359939	0.290056	0.0402791	0.732896	1.3438e-06	0.230279	0.720879	0.643447	0.00860601	0.702488	0.440342	0.997021	0.122403	0.576793	0.321726
0.332925	0.155238	0.576172	0.552214	0.474314	0.0526997	0.979085	0.988666	0.266989	0.321373	0.0063454	0.0178697	0.403618	0.466594	0.420532	0.0071108	0.108773	0.465533
0.246809	0.267915	0.543151	0.0427538	0.579813	0.0965869	0.047649	3.0124e-05	0.250788	0.202827	0.00946946	0.880718	0.483813	0.192066	0.060485	0.010926	0.415352	0.567228
0.406037	0.213167	0.499516	0.372559	0.406572	0.105542	0.000431288	5.14847e-05	0.40892	0.458988	0.564635	0.313214	0.463384	0.193389	0.933029	0.150596	0.314973	0.168586
0.386219	0.0776756	0.655054	0.254388	0.268373	0.085875	0.0161669	0.00650356	0.122294	0.461437	0.386882	0.410129	0.484053	0.282667	0.0417696	0.0364685	0.320311	0.321189
0.459023	0.0849275	0.495642	0.131882	0.353001	0.564685	3.48114e-07	0.276349	0.509955	0.134705	0.421416	0.00183013	0.682573	0.106974	0.763719	0.000442258	0.0297338	0.246525
0.451156	0.0326265	0.457651	0.24931	0.810668	0.353346	0.950731	0.809073	0.429168	0.257034	0.101405	0.00238948	0.469033	0.178964	0.531467	0.0114045	0.0502613	0.28128
0.619946	0.255795	0.915268	0.121772	0.815097	0.00467981	0.000292995	2.25589e-06	0.316284	0.381221	0.0432646	0.245783	0.801371	0.574626	0.00307625	0.160737	0.400252	0.205484
0.368145	0.34544	0.652082	0.349722	0.43321	0.268321	0.982136	0.00100384	0.913218	0.0591191	0.388745	0.517926	0.352901	0.410012	0.141059	0.00701134	0.456514	0.302067
0.52551	0.043177	0.695704	0.380629	0.783439	0.00526529	0.435061	0.00510401	0.86734	0.491751	0.248925	0.183449	0.488566	0.415258	0.258011	0.0649472	0.26049	0.263281
0.462303	0.138411	0.394346	0.467751	0.506798	8.28697e-05	0.0640053	4.96342e-07	0.501805	0.29515	0.503771	0.25698	0.525146	0.452784	0.153719	0.219131	0.109183	0.231773
0.150462	0.00599749	0.557377	0.396898	0.508661	0.116734	0.999805	1.09132e-06	0.421545	0.225576	0.478791	0.377032	0.381723	0.327355	0.898221	0.00046969	0.444015	0.508238
0.271763	0.304695	0.593064	0.0857187	0.920028	0.0120727	0.996429	0.00142138	0.440131	0.46801	0.901292	0.0902451	0.608585	0.392414	0.907041	0.158863	0.436477	0.279101
0.518543	0.0059832	0.505341	0.0123221	0.458086	0.0410534	0.51385	9.08568e-08	0.360433	0.376194	0.00694704	0.00603831	0.484962	0.271397	0.667742	0.0557139	0.0936214	0.091061
0.786794	0.00627055	0.699933	0.0489987	0.343445	0.0216868	0.0104008	3.70918e-06	0.457568	0.102566	0.885651	0.0493042	0.557214	0.246752	0.145493	0.397127	0.1053	0.230255
0.355513	0.118036	0.262591	0.346982	0.404728	0.256537	3.77777e-05	0.0104334	0.398704	0.385588	0.574654	0.118495	0.421823	0.481387	0.200083	0.091656	0.306412	0.232323
0.256388	0.248405	0.593481	0.204345	0.722839	0.138614	7.83949e-06	0.0561763	0.788224	0.216696	0.0925229	0.464276	0.804219	0.435163	0.5055	0.132046	0.366465	0.254995
0.637493	0.0604054	0.550585	0.29011	0.826898	0.25781	0.999796	5.09464e-07	0.54791	0.321368	0.945124	0.448025	0.516727	0.296044	0.773751	4.29367e-05	0.356216	0.375319
0.613189	0.208333	0.197486	0.353996	0.835625	0.00419726	0.988215	0.756225	0.78771	0.51437	0.626523	0.000802721	0.511295	0.317607	0.360149	0.359654	0.105775	0.240546
0.187598	0.300182	0.483198	0.287385	0.503589	0.055958	0.933511	5.3667e-07	0.524018	0.390184	0.0347752	0.11818	0.667737	0.40949	0.916992	0.00116233	0.410299	0.305537
0.332035	0.396386	0.61255	0.0929018	0.976553	0.0187732	0.985599	2.39736e-06	0.387739	0.0072565	0.207239	0.239685	0.280146	0.324539	0.936687	0.266816	0.208747	0.176844
0.349063	0.0185974	0.450446	0.430524	0.622678	0.0993957	0.238396	0.00483077	0.446838	0.230808	0.209062	4.7226e-05	0.454661	0.451283	0.572675	0.0881456	0.13237	0.154514
0.661417	0.404274	0.606498	0.230791	0.23675	0.0242211	0.215127	2.12547e-05	0.998674	0.233109	0.350751	0.00357735	0.288977	0.457927	0.164353	0.163911	0.40457	0.29472
0.552483	0.116372	0.19139	0.321428	0.44702	0.0687115	0.331356	0.000169308	0.425209	0.413424	0.469287	0.0664067	0.313018	0.467991	0.573074	0.0293286	0.566233	0.299244
0.0422517	0.432735	0.10365	0.542304	0.358314	0.00171754	0.954344	0.00237443	0.396091	0.266553	0.078051	0.061942	0.741868	0.170782	0.138836	0.218063	0.0686308	0.276871
0.316843	0.274648	0.355726	0.220883	0.401455	0.382555	0.999875	0.00307561	0.30459	0.490695	0.544758	0.00166535	0.412116	0.273877	0.985933	0.18537	0.396832	0.233849
0.368964	0.186198	0.365745	0.0500998	0.856265	0.486686	1.83723e-05	0.999804	0.491248	0.269183	0.112585	0.00806039	0.450271	0.469024	0.933331	0.0427362	0.442852	0.191886
0.492088	0.159271	0.363673	0.220986	0.255149	0.0118037	0.00148594	0.000250125	0.882561	0.37725	0.000467951	1.0911e-05	0.581366	0.575159	0.149037	0.17674	0.066134	0.152946
0.956718	0.0766034	0.465621	0.0780071	0.768698	0.289475	5.8052e-06	0.000453069	0.796815	0.22074	0.201322	0.0308819	0.760361	0.317565	0.25607	0.0118115	0.196324	0.245551
0.732967	0.0791801	0.458183	0.397298	0.753862	0.0515877	0.932544	0.0447479	0.512992	0.278205	0.308966	0.98874	0.485076	0.186409	0.0876321	0.142713	0.413046	0.356912
0.390223	0.0435499	0.488155	0.310175	0.245654	0.241524	0.999516	7.55205e-07	0.506816	0.515447	0.0978122	0.017381	0.385508	0.425102	0.414504	0.183271	0.341206	0.171362
0.60965	0.0549619	0.506685	0.034821	0.246924	0.255415	0.947855	0.00532707	0.587738	0.00762513	0.695388	0.0103714	0.542012	0.338176	0.41125	0.118634	0.662072	0.182595
0.444067	0.26497	0.359578	0.403606	0.788415	0.343846	0.375197	2.90844e-05	0.56443	0.444232	0.518743	0.00117126	0.602618	0.166721	0.846126	0.223013	0.41367	0.330016
0.820065	0.25322	0.363265	0.144417	0.373413	0.0264573	0.230784	0.576019	0.321936	0.362617	0.015693	0.0311099	0.514989	0.310988	0.211876	0.0572885	0.288903	0.347423
0.501403	0.380419	0.552361	0.0102645	0.463914	0.0936615	0.999971	1.9993e-05	0.548458	0.00313326	0.406	0.148724	0.40135	0.409774	0.492187	0.27778	0.521758	0.311086
0.585134	0.389742	0.460015	0.181641	0.699516	0.149274	0.00460939	0.648183	0.428018	0.0895885	0.736036	0.0375369	0.531249	0.325321	0.979596	0.0569497	0.197471	0.264975
0.496529	0.00119399	0.738036	0.109359	0.841633	0.000132198	0.000787369	4.26643e-05	0.451471	0.221972	0.895182	0.0709565	0.315236	0.154559	0.0258153	0.121904	0.329063	0.169767
0.408915	0.118145	0.460204	0.128494	0.80727	0.148934	0.70155	2.56198e-05	0.367493	0.0104404	0.155622	0.000205954	0.391401	0.364667	0.821692	0.0586341	0.383652	0.333233
0.827452	0.510181	0.492095	0.965097	0.128519	0.103646	0.177287	0.000317002	0.0650839	0.607492	0.858985	0.000856654	0.692321	0.220889	0.833301	0.00498148	0.378099	0.172509
0.807673	0.424286	0.444529	0.176555	0.427834	0.151548	0.992148	8.97369e-07	0.470195	0.364354	0.00845491	0.163912	0.338107	0.374465	0.0199252	0.00277871	0.772407	0.277329
0.669646	0.236752	0.851443	0.0345242	0.644186	0.00237971	0.0283258	0.00252456	0.749628	0.300278	0.0120768	0.0535166	0.495319	0.336849	0.997242	0.171163	0.269964	0.184637
0.484525	0.130378	0.485594	0.434042	0.482158	0.1969	3.31658e-05	0.947537	0.455198	0.38909	0.72373	0.359343	0.446221	0.444301	0.821692	0.0127197	0.116463	0.148335
0.362722	0.281235	0.360903	0.405567	0.67248	0.139301	0.457688	0.0402928	0.347812	0.233268	0.00410155	0.363982	0.45419	0.226693	0.6003	8.94107e-06	0.440305	0.311674
0.56119	0.0223134	0.169704	0.0232994	0.512464	0.0181146	0.999649	2.86748e-07	0.483984	0.379771	0.473208	0.0994749	0.552828	0.365805	0.0729967	0.00776486	0.0479961	0.348357
0.356667	0.131326	0.579227	0.571082	0.478362	0.0378618	0.000133695	0.0488363	0.214921	0.206319	0.698825	0.0618869	0.597065	0.19559	0.471051	4.54252e-05	0.207939	0.426444
0.385184	0.0294927	0.625285	0.415571	0.295267	0.049167	1	0.000147918	0.534966	0.377202	0.0907291	0.115672	0.604253	0.459301	0.0619922	0.30798	0.412726	0.629268
0.937419	0.142526	0.447304	0.0488081	0.0835001	0.0805695	0.989902	0.00136947	0.538694	0.431926	0.693017	1.66529e-05	0.471493	0.3559	0.685686	0.211022	0.245872	0.383171
0.381256	0.23602	0.536625	0.296799	0.520821	0.0141378	0.991939	1.20189e-07	0.622239	0.227847	0.771874	0.295091	0.453118	0.412696	0.760564	0.145161	0.0657549	0.132332
0.890355	0.21681	0.496427	0.169117	0.732487	0.066907	5.72009e-08	7.03634e-05	0.45384	0.386056	0.830767	0.000606517	0.59767	0.398522	0.471654	0.0366041	0.314554	0.0956256
0.334176	0.0542658	0.477388	0.706757	0.496041	0.0821404	0.0277987	2.28563e-08	0.48149	0.283368	0.474673	3.78646e-08	0.525262	0.151546	0.691299	0.324048	0.499352	0.180126
0.792985	0.602766	0.549582	0.392115	0.960845	0.0371799	0.936602	0.000124215	0.386342	0.657147	0.447957	0.0493955	0.518306	0.295417	0.815468	0.0999877	0.241936	0.306474
0.803466	0.262147	0.583683	0.222029	0.327618	0.153037	0.97144	5.59898e-05	0.334513	0.197698	0.692702	0.00172159	0.59245	0.337083	0.0645096	0.00500076	0.501264	0.222289
0.836265	0.136157	0.447922	0.542043	0.0135869	0.00270323	0.14507	0.0686219	0.565513	0.206929	0.0867282	0.0780982	0.604688	0.485182	0.927697	0.159927	0.199591	0.391645
0.670845	0.303552	0.659687	0.166418	0.0813285	0.0890903	3.79972e-06	0.000184365	0.465747	0.296536	0.410138	1.01522e-05	0.377584	0.304406	0.99944	0.150153	0.165064	0.162118
0.744668	0.264089	0.529324	0.295052	0.6971	2.96165e-05	0.00328782	0.398385	0.214015	0.240279	0.505792	0.0362081	0.516657	0.20769	0.440807	0.0950734	0.0690963	0.337705
0.333996	0.120265	0.563743	0.540535	0.272805	0.0266512	0.920637	1.89257e-05	0.231315	0.290409	0.967934	0.03821	0.688744	0.126989	0.999591	0.114687	0.615871	0.198648
0.3428	0.0599024	0.456912	0.29011	0.421982	0.00423549	0.999562	0.165659	0.451525	0.262212	0.000259856	0.273517	0.538227	0.387764	0.0695875	0.296784	0.125006	0.169558
0.471605	0.245777	0.665771	0.444377	0.939552	0.137	0.849686	0.612748	0.963777	0.470311	0.346477	0.362138	0.469959	0.178246	0.0268626	0.061305	0.580934	0.246125
0.0854988	0.535421	0.365457	0.0882459	0.539863	0.103576	0.999988	0.27703	0.489626	0.357496	0.877036	0.0311327	0.439664	0.400848	0.6974	0.0136458	0.0415371	0.121575
0.215627	0.146938	0.538885	0.113378	0.783822	0.0759628	0.984794	0.00124823	0.280194	0.352149	0.745451	0.169801	0.341754	0.2207	0.963882	0.00277871	0.385227	0.224869
0.613805	0.0385868	0.462308	0.35556	0.752281	0.140462	0.114985	0.000791819	0.647294	0.27999	0.786621	0.0359726	0.866296	0.148158	0.258011	0.412716	0.016963	0.134117
0.548663	0.330803	0.395007	0.395784	0.821232	0.0343394	0.07431	0.970478	0.496775	0.458709	0.0092913	0.29217	0.410499	0.354335	0.0478626	0.166245	0.586138	0.113842
0.17687	0.429352	0.511827	0.0081974	0.59868	0.515007	0.988714	0.000194021	0.45187	0.392712	0.300095	0.177848	0.546584	0.333501	0.266259	0.188663	0.129874	0.359913
0.626289	0.238187	0.636316	0.387581	0.859495	0.0843067	0.0190783	4.68657e-06	0.99435	0.364589	0.53531	0.17594	0.462339	0.24647	0.5208	0.118216	0.183773	0.0810999
0.636706	0.409383	0.230378	0.27409	0.805565	0.393653	0.00145882	0.000126609	0.535371	0.164936	0.219668	0.191773	0.450959	0.370861	0.0732293	0.00013366	0.627095	0.422715
0.58899	0.150225	0.591406	0.438163	0.250613	0.0448296	3.28565e-06	0.874911	0.375247	0.165682	0.352927	0.000138713	0.468032	0.411743	0.968375	0.012277	0.237581	0.0770852
0.31121	0.156846	0.532175	0.360238	0.878843	0.0672294	0.998972	0.000210737	0.572199	0.338887	0.196421	0.400574	0.665674	0.149234	0.592897	0.0113576	0.314829	0.237985
0.418692	0.285636	0.88278	0.24449	0.399547	0.0864653	0.704894	8.26741e-05	0.133636	0.394677	0.00483748	0.0221743	0.331259	0.236559	0.0980579	0.00652937	0.248713	0.10879
0.528722	0.298724	0.657242	0.303073	0.378608	0.169886	0.00356672	0.090898	0.269685	0.0721195	0.65252	0.00153776	0.460187	0.36863	0.993167	0.0783434	0.204331	0.129262
0.382196	0.0709113	0.318738	0.56945	0.253713	0.137372	0.562601	0.00424631	0.44022	0.474748	0.99996	0.351444	0.423783	0.315107	0.618257	0.136369	0.37459	0.110555
0.430431	0.0106601	0.507486	0.367676	0.439361	0.0055068	0.998816	0.00305278	0.429335	0.591983	0.142958	0.0533812	0.613483	0.328204	0.352519	0.0148097	0.165471	0.174634
0.230959	0.538172	0.514518	0.0463086	0.501538	0.230953	0.957306	0.246972	0.451035	0.490053	0.249918	0.309563	0.718764	0.27224	0.637858	0.00643822	0.153501	0.305039
0.210642	0.248053	0.450585	0.0498724	0.472848	0.0311758	0.00290095	0.0192391	0.508322	0.00599395	0.212391	0.0156759	0.409938	0.384814	0.936395	0.0729709	0.111251	0.511475
0.707546	0.132745	0.509142	0.237486	0.549449	0.0964097	0.855221	1.14268e-05	0.718497	0.200707	0.0859698	0.0273106	0.484774	0.231616	0.0170707	0.271567	0.479818	0.401258
0.894975	0.501486	0.784629	0.452882	0.324315	0.110775	4.43548e-09	0.00555499	0.475455	0.00328424	0.605729	0.500674	0.473434	0.274334	0.0995251	0.170365	0.00343014	0.394762
0.620378	0.0142248	0.388402	0.344793	0.19305	0.169907	0.957239	1.61661e-05	0.282004	0.236801	0.0210841	0.0404932	0.517357	0.246856	0.784685	0.176643	0.311151	0.295263
0.609047	0.332101	0.491958	0.42753	0.579732	0.163036	0.853994	8.16865e-06	0.600156	0.265901	0.284086	0.0352923	0.655694	0.414743	0.566355	0.00274972	0.198595	0.351951
0.732338	0.285379	0.547794	0.386186	0.320102	0.0222408	0.999365	0.0154601	0.444556	0.510271	0.563272	0.464438	0.508455	0.265261	0.168217	0.000726776	0.623453	0.118724
0.449012	0.254906	0.39664	0.479384	0.420344	0.0292686	0.999512	6.93999e-07	0.266324	0.0797848	0.239519	5.68299e-08	0.51776	0.440334	0.098297	6.39236e-05	0.337733	0.192295
0.249659	0.143608	0.483908	0.320663	0.667078	0.0294982	0.0109771	0.352748	0.393231	0.339577	0.511218	0.00589126	0.471146	0.207789	0.452637	0.26642	0.40627	0.282363
0.266152	0.358625	0.488199	0.236701	0.271688	0.138767	0.000698829	0.706367	0.997124	0.0803377	0.575566	0.0348284	0.388392	0.454615	0.0283802	0.291261	0.371235	0.201984
0.471417	0.18249	0.299783	0.461465	0.581677	0.0173713	0.967965	1.23874e-06	0.183626	0.453028	0.366715	0.00273556	0.470336	0.331331	0.269878	0.142881	0.343415	0.474267
0.381946	0.394629	0.483747	0.656022	0.574201	0.144187	0.962	6.20975e-07	0.538429	0.411341	0.490591	0.0628828	0.285597	0.417484	0.999899	0.0669277	0.204555	0.266114
0.570695	0.24656	0.808788	0.0447435	0.634933	0.231146	0.994496	0.0433218	0.471744	0.487436	0.0506642	0.000881773	0.349186	0.471512	0.85369	0.000162904	0.313931	0.367297
0.378805	0.250413	0.125658	0.102113	0.87957	0.0593734	0.954243	0.521969	0.330772	0.111279	0.774963	0.407925	0.558977	0.425418	0.362553	0.0572036	0.236841	0.268282
0.889477	0.233975	0.479795	0.345165	0.714962	0.128354	0.200469	0.00336462	0.597279	0.247614	0.512252	0.427432	0.392966	0.250749	0.0643421	0.242453	0.379725	0.38294
0.697341	0.161658	0.387483	0.13931	0.462191	0.00369139	0.99967	0.0140848	0.44612	0.000450246	0.0437847	0.0411981	0.356522	0.290685	0.106272	0.0493078	0.0523579	0.277773
0.832351	0.0757986	0.302311	0.117809	0.38782	0.650445	0.0015399	1.64079e-06	0.227098	0.34268	0.997348	0.00188446	0.788042	0.445261	0.377385	0.0113279	0.253249	0.522071
0.459551	0.354359	0.483761	0.366683	0.466267	0.016066	0.861935	6.62462e-06	0.33968	0.361359	0.670831	0.433754	0.424389	0.504579	0.944192	0.246903	0.402318	0.396073
0.287122	0.211115	0.581259	0.21381	0.647084	0.051311	0.634695	0.00202596	0.272005	0.45378	0.428351	0.139565	0.460016	0.218684	0.797377	0.0545131	0.185595	0.169295
0.648239	0.141283	0.574217	0.0510478	0.601182	0.045283	0.00980672	3.70626e-06	0.993908	0.182278	0.902346	0.393556	0.733532	0.115715	0.982602	0.000493588	0.305572	0.0903994
0.513047	0.332477	0.51133	0.361483	0.999363	0.0640086	0.998985	2.49632e-05	0.637765	0.366324	0.000509106	0.0587408	0.553523	0.31155	0.999881	0.094994	0.146461	0.0927337
0.447757	0.231378	0.49787	0.175377	0.326845	0.32804	0.00548876	0.395464	0.412165	0.155619	0.806584	0.121001	0.470112	0.266445	0.473072	0.0539883	0.349741	0.311694
0.531631	0.49656	0.437978	0.0299528	0.998076	0.0380294	0.000115912	5.62447e-07	0.3288	0.430493	0.0458961	0.493934	0.503929	0.233102	0.797377	0.000153597	0.656305	0.351891
0.640702	0.297957	0.728626	0.161003	0.689504	0.0573072	0.999137	1.07746e-08	0.505051	0.410761	0.00458569	0.422851	0.407714	0.419571	0.403654	0.00434925	0.25184	0.33883
0.457845	0.342547	0.589503	0.0159969	0.664238	0.61054	0.999881	0.919797	0.886627	0.106177	0.00685718	2.10179e-06	0.355628	0.298714	0.017285	7.46799e-05	0.235583	0.182835
0.360998	0.227624	0.7155	0.331006	0.488746	0.252258	0.000385611	9.10182e-07	0.531573	0.437827	0.273028	0.375908	0.987077	0.232642	0.551284	0.250597	0.321698	0.337378
0.470436	0.204493	0.519439	0.527456	0.61339	0.00198262	0.098523	3.59646e-05	0.430842	0.344087	0.0362379	0.00299312	0.673902	0.296919	0.329181	0.210995	0.145169	0.0699131
0.26336	0.299642	0.297092	0.287385	0.224185	0.000387107	0.0776753	0.00104117	0.0675296	0.306104	0.00685937	5.78539e-09	0.459884	0.218655	0.0123823	0.0882755	0.253506	0.431861
0.266323	0.259491	0.53879	0.0313491	0.807445	0.00104086	0.00645011	0.107201	0.776158	0.405317	0.0427003	0.106341	0.808362	0.327687	0.698014	1.65534e-05	0.242359	0.0576077
0.302984	0.437762	0.661039	0.0324915	0.427073	0.0569514	0.0161816	1.3945e-05	0.744339	0.394895	0.00694704	0.118704	0.716846	0.189784	0.394602	0.0835816	0.16682	0.305277
0.880285	0.0389561	0.243477	0.0231153	0.395817	0.0112185	0.0838566	0.571338	0.393125	0.331458	0.80367	0.0545019	0.524995	0.330276	0.0344533	0.207088	0.0720051	0.210752
0.505591	0.00521623	0.425822	0.458575	0.527521	0.00324268	3.05206e-07	0.0220587	0.686884	0.445062	0.319837	0.00369595	0.502023	0.377632	0.0309827	0.450249	0.120596	0.399095
0.64361	0.00480562	0.490985	0.183207	0.560114	0.00205507	0.961549	0.930546	0.305511	0.278186	0.203801	0.00312237	0.545642	0.289188	0.985458	0.0615839	0.272989	0.332869
0.511458	0.430181	0.472551	0.183075	0.574916	0.325992	0.44375	0.00142814	0.407638	0.0843785	0.141077	0.326457	0.677712	0.408096	0.839205	0.207396	0.275046	0.274514
0.246538	0.279309	0.476931	0.136447	0.619614	0.400028	0.549066	0.627047	0.98013	0.0533135	0.436852	0.988966	0.472171	0.441914	0.30197	0.0284919	0.0524732	0.206064
0.0889762	0.378506	0.468506	0.314432	0.391072	0.09391	0.998729	6.00352e-05	0.901579	0.395285	0.465972	0.554809	0.495715	0.509809	0.307601	0.449347	0.277306	0.417432
0.307671	0.0687107	0.520595	0.191431	0.530377	0.36056	0.265004	2.1668e-05	0.727434	0.367991	0.314351	0.000642245	0.371976	0.234544	0.0615548	0.175427	0.450489	0.277707
0.486509	0.120467	0.511896	0.449337	0.425727	0.197418	0.635747	0.912117	0.424669	0.307972	0.0260056	0.150184	0.53145	0.558955	0.999482	0.0797631	0.571963	0.163164
0.296387	0.301081	0.311687	0.0295417	0.649051	0.0664293	0.130682	4.59133e-06	0.550159	0.491044	0.91007	9.18714e-05	0.450764	0.243037	0.143338	0.0177563	0.626958	0.32603
0.314325	0.0373821	0.639192	0.207644	0.182283	0.328926	0.215267	3.49992e-05	0.286322	0.240198	0.322127	0.0686702	0.751695	0.151291	0.336844	0.388301	0.352364	0.212454
0.539643	0.52599	0.395768	0.436765	0.687202	0.0481251	0.140807	0.485079	0.601043	0.489707	0.599867	0.0327619	0.888961	0.428644	0.999823	0.0845311	0.137082	0.160137
0.376753	0.501675	0.673876	0.126783	0.380062	0.0805997	0.0306287	1	0.482646	0.484887	0.361147	0.38011	0.525229	0.348599	0.034785	0.0860562	0.109481	0.31635
0.413638	0.427296	0.180594	0.451233	0.374383	0.0643423	0.999921	0.163354	0.637117	0.302385	0.365301	0.445988	0.465576	0.435859	0.901129	0.152093	0.242845	0.302821
0.852663	0.269057	0.64051	0.378923	0.516967	0.101892	0.607143	1.37142e-05	0.513805	0.277613	0.644763	0.004911	0.483699	0.363275	0.650948	0.0657868	0.197707	0.554364
0.315728	0.326456	0.57495	0.254834	0.495276	0.0547293	0.465147	0.975393	0.812046	0.251767	0.951443	0.121357	0.494204	0.390446	0.110791	6.3572e-05	0.254853	0.15302
0.308101	0.104172	0.603145	0.342716	0.669625	0.00432597	0.893191	0.986192	0.699862	0.407373	0.015026	0.330872	0.156393	0.310742	0.155274	0.128053	0.37189	0.283238
0.387677	0.178466	0.564145	0.274384	0.741688	0.247057	0.964205	0.610895	0.432121	0.392444	0.65252	0.447027	0.682005	0.208719	0.995971	0.148473	0.443158	0.335261
0.780471	0.00654127	0.459878	0.354259	0.12697	0.0335225	0.00970534	0.0271615	0.181839	0.28326	0.465044	0.0923089	0.650012	0.429984	0.00376007	0.111504	0.27953	0.295525
0.426494	0.135723	0.473018	0.170224	0.713897	0.167074	0.0229348	1.33822e-06	0.533631	0.492974	0.35044	0.00312899	0.975032	0.397595	0.140269	0.066686	0.188124	0.28804
0.388988	0.36829	0.571112	0.414882	0.121592	0.00118851	0.922034	0.173507	0.338749	0.265865	0.606094	2.66826e-06	0.524742	0.353295	0.996126	0.220669	0.365324	0.274655
0.270948	0.351072	0.820639	0.394303	0.455244	0.117695	0.400959	0.000382104	0.304485	0.314575	0.0375391	0.0551932	0.448651	0.282166	0.0818516	0.101257	0.451177	0.526271
0.543002	0.0560333	0.595008	0.192928	0.544679	0.0376984	0.250026	0.670042	0.607435	0.268898	0.196421	0.261663	0.424428	0.523335	0.11308	0.16248	0.432645	0.242201
0.424709	0.279316	0.518792	0.0841045	0.678274	0.136427	0.999993	0.00215183	0.401667	0.499759	0.878894	0.0082371	0.464399	0.164825	0.560434	0.101285	0.300635	0.234523
0.713624	0.0524793	0.436479	0.287043	0.573856	0.133492	3.54487e-05	0.875887	0.422114	0.395313	0.020897	0.350065	0.562481	0.305907	0.493254	0.146587	0.315295	0.248056
0.258657	0.0646225	0.426966	0.2366	0.439427	0.310582	0.990546	3.61069e-07	0.956258	0.267722	0.0195788	0.0533028	0.285762	0.424883	0.0211993	0.0765125	0.346443	0.399372
0.425858	0.178677	0.489958	0.0068312	0.593254	0.154007	0.994621	0.0547178	0.557244	0.324368	0.488663	0.00253385	0.4711	0.383798	0.230973	0.000100023	0.816231	0.147778
0.353695	0.0166655	0.303982	0.243394	0.269051	0.0415849	0.768963	0.0008281	0.375943	0.343466	0.791165	0.56465	0.472546	0.320122	0.280641	4.59448e-05	0.475707	0.259036
0.454399	0.256547	0.388366	0.274949	0.822285	0.12868	0.351658	7.27906e-05	0.265307	0.42015	0.188712	0.0941105	0.467346	0.446968	0.00690295	0.315845	0.256982	0.462627
0.408203	0.251722	0.376634	0.395427	0.360995	0.000422524	0.999865	0.021992	0.514293	0.47869	0.00862173	0.0039052	0.264355	0.408306	0.90928	0.614953	0.24152	0.143729
0.609947	0.169611	0.675561	0.191086	0.346977	0.212758	3.5104e-06	5.46333e-06	0.243387	0.4639	0.493882	0.301674	0.420477	0.289139	0.959315	0.150695	0.293792	0.0776679
0.419689	0.240024	0.487654	0.135861	0.47793	0.362025	0.999697	0.0232428	0.449519	0.41493	0.580545	0.293418	0.468042	0.326841	0.271303	0.385428	0.307008	0.222322
0.410766	0.00438585	0.575081	0.455278	0.463501	0.229774	0.974034	3.04333e-06	0.262921	0.361461	0.0993391	0.423618	0.512592	0.286362	0.996108	0.0103495	0.265936	0.281791
0.335167	0.192934	0.487649	0.312479	0.487543	0.0155647	0.970621	0.024965	0.167719	0.0267366	0.745713	0.375719	0.630839	0.41528	0.449427	3.88822e-05	0.273954	0.21792
0.719707	0.0312128	0.424165	0.0550734	0.971533	0.000697232	0.58234	0.000193638	0.976294	0.24745	0.28743	0.36352	0.578683	0.528435	0.892119	0.0696113	0.253746	0.205374
0.559069	0.396845	0.417121	0.0743873	0.33329	0.0832861	0.519668	0.00141391	0.502157	0.434437	0.966905	0.0294268	0.468609	0.251935	0.607561	0.0064247	0.224487	0.341177
0.666245	0.696217	0.714851	0.203602	0.749476	0.127463	0.733097	1.06076e-06	0.465132	0.271247	0.397944	8.9389e-08	0.682843	0.371023	0.421392	1.68785e-06	0.0350065	0.387628
0.421087	0.0432426	0.406886	0.00835026	0.445995	0.238186	0.996127	0.540472	0.972352	0.279919	0.294275	0.000139428	0.418908	0.41267	0.131175	0.00993388	0.220066	0.196352
0.496279	0.137204	0.776573	0.470575	0.547802	0.0820465	0.999886	3.96427e-06	0.996103	0.271387	0.759776	0.551855	0.404979	0.245477	0.167603	0.000315012	0.104506	0.178715
0.533353	0.455432	0.460143	0.526525	0.755731	0.14023	0.317366	0.00921135	0.5725	0.220191	0.544569	0.0110925	0.592228	0.369432	0.425048	0.135425	0.61352	0.113278
0.514498	0.107393	0.606419	0.0714029	0.461912	0.407967	0.920493	2.55455e-05	0.305515	0.345605	0.0002518	0.0514893	0.626461	0.193238	0.339268	0.000147393	0.306131	0.328304
0.463547	0.296054	0.448664	0.540535	0.807336	0.437095	0.999922	0.782263	0.214637	0.257232	0.00991657	0.295761	0.411383	0.361709	0.366963	0.215214	0.0697189	0.166014
0.420177	0.215232	0.416874	0.211366	0.324023	0.0543057	0.886113	3.82595e-05	0.543975	0.419372	0.119754	0.512901	0.430029	0.459858	0.125888	0.173398	0.159458	0.202267
0.287842	0.00377411	0.518574	0.295052	0.908316	0.112972	4.19612e-05	0.363721	0.257197	0.307562	0.000323484	0.991187	0.555026	0.352354	0.994852	0.000110138	0.323667	0.26495
0.463602	0.409702	0.812838	0.191359	0.0734621	0.411794	0.0367124	0.998877	0.416975	0.367567	0.0437013	0.164035	0.328466	0.422089	0.682456	0.0249568	0.447104	0.350574
0.237315	0.0113113	0.474887	0.222284	0.0715601	0.0613308	0.990449	0.000464704	0.45503	0.352243	0.434908	0.0351176	0.621325	0.440121	0.220242	0.121731	0.295467	0.118039
0.318874	0.224757	0.446398	0.174451	0.0169483	0.43274	5.76262e-05	7.1331e-07	0.466256	0.381236	0.871407	0.538392	0.485852	0.287008	0.821242	0.0693767	0.0654083	0.251799
0.581822	0.174041	0.626002	0.129787	0.719806	0.233241	0.00706377	6.56148e-05	0.542216	0.505808	0.373167	0.508479	0.605197	0.369352	0.362774	0.15492	0.171849	0.245015
0.33073	0.19189	0.413604	0.300382	0.538294	0.679403	0.9822	6.63324e-06	0.714881	0.00324119	0.0996822	0.251292	0.555298	0.183962	0.13964	0.290087	0.321532	0.301978
0.359551	0.128473	0.411009	0.625052	0.393843	0.0412188	0.111082	0.000186105	0.263977	0.473309	0.000141632	0.27453	0.707219	0.300384	0.641723	0.408708	0.745852	0.136432
0.611788	0.000971892	0.465394	0.281565	0.63324	0.0222783	0.00138128	0.0255343	0.475604	0.366395	0.0828682	0.0383833	0.44905	0.154661	0.934811	3.16011e-05	0.0617361	0.300128
0.551587	0.232687	0.480253	0.0475342	0.537883	0.0295328	0.999432	6.27174e-05	0.214623	0.30234	0.48007	0.0400275	0.572269	0.0956469	0.266472	0.00269677	0.3645	0.214856
0.374282	0.30233	0.776948	0.35255	0.244592	0.111278	0.980999	0.077663	0.554056	0.229712	0.5915	0.00187167	0.422326	0.476696	0.122923	6.54229e-07	0.284088	0.157152
0.604355	0.17395	0.563228	0.309053	0.562171	0.184739	0.948105	0.00576848	0.442844	0.041508	0.234539	0.0456171	0.459986	0.3759	0.853588	0.0480342	0.202497	0.306963
0.442892	0.232268	0.383395	0.0399146	0.812854	0.00029194	0.998769	0.702036	0.446487	0.310711	0.179949	0.000463299	0.916567	0.4507	0.7539	0.000980173	0.297024	0.184329
0.311705	0.0625606	0.219298	0.313772	0.419888	0.251864	0.0280405	0.012681	0.5074	0.477032	0.293259	0.190483	0.482089	0.40803	0.759891	0.0183599	0.160876	0.397393
0.33275	0.155997	0.478374	0.516212	0.805951	0.356746	0.302428	0.000376909	0.486737	0.427663	0.00176891	0.0139305	0.48527	0.342306	0.526817	0.0179699	0.277317	0.395216
0.403895	0.0154846	0.347436	0.530093	0.348652	0.0712098	0.000232076	0.000103863	0.46026	0.353028	0.250569	0.00253396	0.405649	0.11442	0.386093	0.456123	0.490578	0.12243
0.598112	0.248725	0.427752	0.461009	0.211718	0.0857264	0.000609878	0.0312823	0.716531	0.420353	0.561276	0.0853485	0.387277	0.303253	0.982351	0.0366041	0.00380906	0.30656
0.781174	0.0968791	0.185517	0.508833	0.171416	0.0242932	0.898995	2.32024e-05	0.962821	0.383226	0.942056	2.95888e-05	0.652255	0.354936	0.801984	0.00864922	0.298071	0.356843
0.594975	0.0849185	0.416934	0.360758	0.393985	0.317832	0.096578	7.09114e-07	0.526562	0.249093	0.327714	0.0185571	0.46537	0.2557	0.984059	4.17247e-05	0.106718	0.203277
0.422964	0.130427	0.68601	0.104489	0.586863	0.0460107	0.00119025	0.81578	0.309994	0.387458	0.817522	0.0110075	0.460038	0.344554	0.0720959	0.0680921	0.308014	0.180404
0.599955	0.0748129	0.478472	0.323742	0.360878	0.00395615	0.170138	0.165728	0.470318	0.448123	0.653678	0.291519	0.362901	0.351379	0.0486498	0.00357478	0.310125	0.35424
0.462169	0.15846	0.267875	0.264904	0.328342	0.257032	9.23202e-06	3.62306e-05	0.545933	0.396327	0.39341	0.402475	0.497965	0.340668	0.353337	0.0481635	0.0955148	0.262116
0.65689	0.11824	0.460965	0.0815821	0.749119	0.0991749	0.999496	6.96544e-05	0.677802	0.447955	0.260876	0.372027	0.336087	0.300485	0.162213	0.0566589	0.212803	0.479899
0.297263	0.00336287	0.464298	0.206454	0.430317	0.0629323	1	0.000112661	0.36794	0.413993	0.0810997	0.0889884	0.535012	0.428608	0.124504	0.0340905	0.40235	0.314091
0.332443	0.00407443	0.468388	0.397954	0.0208017	0.239514	0.998666	0.000216885	0.619708	0.144192	0.381688	0.161876	0.650066	0.406683	0.936322	0.00124398	0.376194	0.303989
0.390087	0.395199	0.529468	0.287135	0.529932	0.277583	0.242989	1.29058e-06	0.51807	0.116185	0.0346284	0.0604799	0.359868	0.281424	0.992284	0.196742	0.269193	0.177326
0.425409	0.202998	0.604109	0.283423	0.324179	0.126937	0.999225	0.0020073	0.262459	0.322364	0.16921	0.00460558	0.510659	0.129598	0.570634	0.412244	0.586181	0.405742
0.43588	0.229631	0.585412	0.213026	0.723701	0.0986273	0.512929	6.13149e-07	0.540605	0.471897	0.953715	0.00965269	0.367422	0.385951	0.996405	0.00174154	0.122567	0.0758731
0.801014	0.200188	0.486362	0.0354187	0.152904	0.0365606	0.58969	0.973746	0.137064	0.556785	0.541266	0.0107546	0.446602	0.389354	0.23164	0.222431	0.172067	0.443352
0.322068	0.364235	0.575907	0.251622	0.527177	0.0912738	0.967985	0.0359366	0.150272	0.446481	0.820607	0.0321291	0.552679	0.341775	0.0547598	0.00112067	0.041612	0.610528
0.397299	0.0513564	0.404338	0.303824	0.71717	0.0752849	1.91465e-05	0.294149	0.23663	0.463172	0.895844	0.209461	0.410562	0.308384	0.743485	0.815141	0.158436	0.205774
0.603894	0.0212268	0.396474	0.0663324	0.363633	0.0353371	0.978141	1.5281e-06	0.393884	0.426672	0.94127	0.39151	0.655429	0.507634	0.980688	0.111428	0.248601	0.213231
0.445905	0.00320259	0.300064	0.307243	0.693866	0.0383802	0.0680465	9.03252e-05	0.61321	0.469547	0.0283509	0.103681	0.48414	0.361483	0.604778	3.63782e-05	0.317273	0.4055
0.607389	0.200011	0.403693	0.434354	0.577556	0.173034	0.872603	0.00088124	0.52892	0.0111078	0.000730955	0.0158798	0.526478	0.435156	0.116006	0.562029	0.227623	0.385196
0.604604	0.202283	0.421479	0.200801	0.533415	0.111333	0.997408	0.512126	0.430049	0.322558	0.479113	0.230672	0.411908	0.456896	0.509248	0.565441	0.0947158	0.166884
0.515804	0.107194	0.772971	0.365969	0.207555	0.175378	0.121446	0.229217	0.997631	0.31246	0.448383	0.490058	0.367387	0.270137	0.072888	0.0387306	0.544108	0.214478
0.509447	0.131183	0.449828	0.569678	0.547533	0.0256187	1	0.518089	0.586581	0.22284	0.351018	0.471112	0.451208	0.465598	0.479265	0.41557	0.566265	0.851146
0.365411	0.450099	0.798057	0.186764	0.995552	0.0638735	0.77016	1.70151e-05	0.357216	0.000216821	0.00012316	0.144124	0.565026	0.471158	0.216132	5.48216e-07	0.453763	0.31009
0.0706867	0.28656	0.839543	0.0692967	0.621115	0.194095	0.999977	0.000519121	0.47649	0.253359	0.603246	5.71566e-05	0.565152	0.140502	0.762679	0.484694	0.196025	0.34126
0.446492	0.267699	0.65303	0.0457659	0.447132	0.0246634	0.99011	0.000120232	0.545631	0.379225	0.326128	0.216255	0.64442	0.587877	0.983819	0.217336	0.62345	0.263799
0.385388	0.00282882	0.45754	0.320663	0.317905	0.0301626	0.999998	0.00167649	0.312179	0.4108	0.0194525	0.256616	0.584035	0.228851	1	0.0273644	0.212528	0.105644
0.767157	0.291799	0.492935	0.256218	0.734593	0.0565127	0.346531	0.203156	0.413258	0.290419	0.0428955	0.433406	0.91245	0.175288	0.376392	0.286909	0.0150842	0.138742
0.546439	0.211867	0.335632	0.51221	0.964355	0.216394	0.0328894	0.107677	0.439937	0.475367	0.755032	3.68741e-05	0.420923	0.337817	0.975836	0.164501	0.142574	0.070633
0.769324	0.0971028	0.462609	0.0908153	0.478313	0.00015138	0.751412	0.00245596	0.654446	0.434587	0.0901421	0.387019	0.669282	0.219446	0.9999	0.000195342	0.0809423	0.208659
0.468747	0.301701	0.694689	0.104489	0.432748	0.221453	0.99765	0.224672	0.42457	0.405771	0.352479	0.172413	0.42949	0.334852	0.747358	0.00687788	0.0153557	0.296169
0.142301	0.136222	0.186883	0.0835683	0.613488	0.156968	0.00644668	0.0111859	0.352585	0.0567636	0.576125	0.314352	0.486079	0.278528	0.18064	0.381352	0.0820791	0.494559
0.840342	0.000613679	0.278914	0.0283242	0.779271	0.275232	0.0548394	0.999986	0.872311	0.443518	0.45375	0.219368	0.490865	0.31376	0.399258	0.119758	0.398658	0.23435
0.805676	0.236423	0.429903	0.0292476	0.834945	0.0221716	0.641272	0.00638147	0.467649	0.449852	0.635318	0.00608694	0.71874	0.456214	0.848465	0.0135214	0.210569	0.270659
0.343737	0.372256	0.741398	0.386648	0.0778824	0.0272951	4.10552e-05	0.449101	0.209033	0.0120162	0.491244	0.412308	0.466429	0.325994	0.686233	0.106527	0.219329	0.184943
0.682239	0.0064075	0.321487	0.138268	0.618227	0.131228	0.936648	0.00776672	0.48239	0.472849	0.340746	0.0526534	0.602137	0.357642	0.109516	0.316395	0.388136	0.276086
0.647398	0.326059	0.499894	0.235176	0.571404	0.10457	0.000180122	7.26472e-06	0.136767	0.262779	0.995898	0.357755	0.486105	0.15358	0.672986	0.0514985	0.529878	0.22989
0.365448	0.367692	0.462519	0.278655	0.198249	0.0745491	1	0.021529	0.546222	0.443507	6.27329e-05	0.458342	0.531221	0.322691	0.424506	0.00325685	0.255466	0.353746
0.826947	0.29613	0.63292	0.377561	0.23397	0.00746349	0.0205927	0.961875	0.737922	0.306781	0.0520054	0.168325	0.274883	0.461643	0.0120103	0.213265	0.204447	0.356006
0.223983	0.382565	0.410838	0.471558	0.251572	0.191633	0.999948	2.20775e-06	0.787556	0.453098	0.819334	0.012813	0.213169	0.314838	0.0467043	0.00801393	0.425276	0.364422
0.39799	0.112915	0.43902	0.0417109	0.382665	0.0489181	0.0197347	0.00381731	0.470416	0.514597	0.00704341	0.458491	0.563513	0.334807	0.0328978	0.00678555	0.28399	0.249778
0.597442	0.397592	0.804415	0.0345288	0.667048	0.143134	0.557611	0.145616	0.565102	0.303653	0.531847	0.0048136	0.458061	0.292702	0.372982	0.0143261	0.378049	0.25251
0.730158	0.415344	0.565785	0.148649	0.395838	0.105275	0.99999	0.00201516	0.58581	0.402239	0.807497	0.0590723	0.47238	0.409727	0.528355	0.000212646	0.42771	0.158104
0.356456	0.120517	0.710821	0.133223	0.642802	0.113573	0.998514	5.92867e-05	0.737197	0.303576	0.139561	0.478153	0.503685	0.458951	0.153261	0.0639477	0.503205	0.185496
0.347853	0.279712	0.0619803	0.303073	0.437712	0.0159574	0.994164	1.69293e-07	0.437644	0.270466	0.0767321	0.00588274	0.508477	0.228334	0.219641	0.133959	0.27865	0.273126
0.336813	0.173169	0.368471	0.152495	0.376557	0.515452	0.00908961	0.0120941	0.123038	0.254659	0.943512	0.19191	0.307554	0.222626	0.998147	0.132943	0.0975927	0.1637
0.4115	0.184771	0.694741	0.145356	0.292151	0.00511133	0.00249581	0.889068	0.456118	0.330912	0.0669209	0.156489	0.617105	0.278414	0.0637698	0.0308025	0.102124	0.367317
0.399768	0.213497	0.631235	0.318582	0.476848	0.184542	0.134309	0.015659	0.35335	0.371992	0.0942785	0.396248	0.507134	0.293776	0.298018	0.262814	0.236382	0.387435
0.452302	0.277196	0.836995	0.501264	0.554141	0.0885442	0.999996	0.555559	0.68456	0.185427	0.684852	0.000120817	0.511481	0.408963	0.204371	0.318582	0.563541	0.340851
0.621167	0.0402401	0.308262	0.420902	0.335645	0.0711461	0.0642613	1.62949e-06	0.504179	0.37675	0.00114375	4.93819e-05	0.465579	0.497853	0.747162	0.0545848	0.60682	0.312577
0.0959521	0.258015	0.547604	0.37194	0.762227	0.123103	0.772231	0.0199762	0.682726	0.351194	0.781736	0.0610702	0.507391	0.461462	0.0476786	0.0089608	0.21715	0.378225
0.529277	0.294449	0.464056	0.438163	0.564322	0.122249	0.743258	1.12773e-05	0.436837	0.3651	0.431171	0.327664	0.442564	0.348934	0.929123	0.00301314	0.461761	0.219472
0.368979	0.229244	0.506197	0.617062	0.486308	0.316838	9.15555e-06	1.46116e-05	0.590686	0.201157	0.571101	0.220456	0.37789	0.438494	0.220166	0.0798445	0.436923	0.42053
0.737607	0.242598	0.595135	0.137566	0.801363	1.52711e-05	0.00263675	0.0271837	0.20476	0.062652	0.579246	0.191764	0.517108	0.24698	0.885018	0.133536	0.278102	0.0808444
0.944238	0.528421	0.342746	0.237253	0.879565	0.0729923	0.99887	0.00343315	0.239014	0.320097	0.816795	0.124956	0.278425	0.422592	0.13886	0.0798641	0.151662	0.349371
0.406624	0.0558838	0.609582	0.418426	0.772978	0.17791	0.906217	0.249609	0.325209	0.369775	0.463134	2.12372e-09	0.371262	0.33665	0.634355	0.000792665	0.434056	0.185958
0.62597	0.0796989	0.535199	0.479047	0.197006	0.0317874	0.99093	4.10195e-06	0.518222	0.284598	0.0015181	0.0974774	0.687031	0.186221	0.427889	0.148756	0.476385	0.362785
0.21756	0.389384	0.468625	0.273633	0.781945	0.117813	0.975711	0.249609	0.481589	0.385579	0.409178	0.122149	0.447404	0.33459	0.343299	0.0641153	0.288178	0.353949
0.442375	0.481898	0.538098	0.56821	0.999268	0.384717	0.976817	0.0023094	0.34668	0.188527	0.385815	0.286743	0.554812	0.504785	0.22218	0.099925	0.0370701	0.185199
0.711219	0.0317007	0.318642	0.154145	0.368625	0.057609	0.0102811	0.00350319	0.530534	0.44438	0.000972016	0.358058	0.620806	0.375301	0.297272	0.018912	0.31348	0.194441
0.339967	0.39875	0.382877	0.495571	0.751807	0.000275431	0.064183	5.65042e-08	0.498005	0.169935	0.0236297	9.4356e-08	0.485375	0.411564	0.45831	0.0648941	0.26268	0.378271
0.467563	0.172938	0.475616	0.103965	0.385142	0.1432	0.210633	0.00991375	0.583975	0.203502	0.0916445	7.6544e-06	0.59692	0.365837	0.0620253	0.0864558	0.0742571	0.187873
0.688558	0.304539	0.629034	0.383925	0.303264	0.363797	0.996205	0.000108029	0.474468	0.732587	0.434907	0.0395876	0.415252	0.264281	0.421999	0.152484	0.343742	0.301851
0.292246	0.278644	0.494683	0.162261	0.987843	0.11137	0.999999	0.000271255	0.539447	0.412818	0.00113224	0.337667	0.559541	0.407836	0.447353	0.0559424	0.191477	0.162806
0.759281	0.00512565	0.880024	0.360624	0.984176	0.18848	0.98172	0.0712367	0.378754	0.346445	0.485807	0.00953565	0.584747	0.298985	0.514517	0.194979	0.17312	0.206503
0.632179	0.268494	0.480851	0.00982591	0.740039	0.161181	0.649676	2.60179e-05	0.407429	0.313136	0.579956	0.00117418	0.249059	0.301903	0.0493185	0.0342275	0.207924	0.337339
0.666199	0.287844	0.425904	0.190697	0.452178	0.00012443	0.00781561	0.945467	0.32549	0.349322	0.463868	0.167064	0.841316	0.325899	0.422072	0.0049162	0.0926088	0.176178
0.495887	0.0108275	0.560734	0.0528523	0.349459	0.0516001	1.6392e-06	0.0731787	0.980949	0.409351	9.69462e-09	0.00922452	0.778789	0.26532	0.334991	0.0440344	0.329841	0.191047
0.214838	0.0651826	0.731213	0.351509	0.85693	0.0631672	0.996834	0.00463783	0.425274	0.382449	0.366942	0.226108	0.559495	0.207097	0.996426	0.00324922	0.172955	0.14477
0.351883	0.253053	0.449001	0.292363	0.969129	0.48879	0.988119	9.43289e-06	0.282703	0.287848	0.989192	0.333348	0.123705	0.284141	0.201025	0.150889	0.238374	0.369468
0.320371	0.0567177	0.435819	0.249293	0.415122	0.418083	0.999556	0.00669787	0.256429	0.19042	0.374023	0.0547264	0.685834	0.406344	0.845323	0.0870606	0.170838	0.318111
0.643106	0.105228	0.460015	0.13902	0.304971	0.0229429	0.99915	0.0277004	0.309855	0.374267	0.0190116	0.338676	0.484878	0.298353	0.978784	0.0901156	0.521222	0.274734
0.467175	0.0670647	0.451078	0.349172	0.602843	0.400026	0.00856633	0.932863	0.987235	0.318306	0.372549	0.457003	0.506491	0.363758	0.983243	0.156636	0.333795	0.19648
0.334859	0.0372652	0.554877	0.285653	0.482072	8.22314e-05	0.952291	0.858383	0.860764	0.280365	1	0.38859	0.319812	0.310894	0.16952	0.404061	0.187115	0.232135
0.423696	0.261911	0.565808	0.262331	0.363091	0.00331765	0.988097	6.28469e-05	0.776456	0.295773	0.185902	0.209416	0.448329	0.192066	0.425983	0.012284	0.301657	0.352237
0.43349	0.3332	0.703324	0.353831	0.329482	0.78604	0.905355	3.64927e-06	0.480301	0.578836	0.48988	0.057093	0.538019	0.242955	0.115442	0.0633844	0.285207	0.205046
0.397863	0.0500263	0.635374	0.2911	0.430123	0.0352265	0.0087865	0.00031384	0.906911	0.470251	0.0840207	0.00172924	0.543371	0.122209	0.387341	0.175187	0.513249	0.264192
0.508528	0.00172639	0.301549	0.140174	0.71596	0.106441	0.886213	6.19984e-05	0.506601	0.146686	0.0187851	0.0201823	0.39362	0.34295	0.328705	0.1486	0.496772	0.202855
0.189002	0.322135	0.598706	0.322668	0.214369	0.119434	1	3.82773e-06	0.551259	0.481716	0.231843	0.0221291	0.245933	0.275201	0.290266	0.0248308	0.630204	0.377979
0.519855	0.364037	0.413145	0.0304448	0.762249	0.360783	0.999315	0.000115869	0.523094	0.415921	0.0490703	0.0924112	0.670388	0.195734	0.928117	0.100861	0.136869	0.36406
0.175318	0.221953	0.640375	0.891905	0.387901	0.0825351	0.999699	0.97583	0.577893	0.238203	0.96357	0.00065846	0.406568	0.331998	0.09873	0.0227825	0.196842	0.0575231
0.723293	0.385201	0.318046	0.33327	0.418708	0.0089526	0.970363	0.917448	0.995456	0.270756	0.994419	0.255974	0.480001	0.255104	0.153143	0.000110149	0.3822	0.362554
0.647439	0.0240652	0.656711	0.515089	0.528621	0.136736	0.00427952	1.22545e-07	0.520881	0.521299	0.436195	7.20277e-05	0.484453	0.41164	0.00784983	0.283571	0.255534	0.336996
0.501078	0.186458	0.491527	0.369972	0.261401	0.289487	0.965068	0.0011038	0.402741	0.176167	0.0588496	0.210329	0.416499	0.239177	0.114545	0.195649	0.220748	0.201845
0.403057	0.235787	0.57544	0.484421	0.871988	0.0241023	0.172917	0.0935646	0.378614	0.438859	0.192975	0.0626796	0.262884	0.11312	0.0844868	0.00161902	0.471567	0.205124
0.407492	0.140711	0.321532	0.360758	0.369463	0.0265123	0.000304042	3.91681e-05	0.788281	0.418954	0.246708	0.123118	0.593745	0.370753	0.983799	0.0166507	0.101104	0.268492
0.523854	0.101328	0.647991	0.517184	0.279113	0.381195	0.802846	0.00296384	0.291124	0.273956	0.124082	0.315674	0.429139	0.127468	0.938555	0.0401591	0.509177	0.390721
0.427365	0.511467	0.658757	0.130612	0.694043	0.0235499	0.866222	0.0108813	0.350588	0.356216	0.82395	1.32687e-07	0.470159	0.334943	0.448164	0.00790105	0.18246	0.0732476
0.484878	0.215478	0.789831	0.396898	0.725714	0.0151349	0.156631	6.32147e-05	0.205136	0.169937	0.910917	0.337168	0.542239	0.135402	0.576706	0.111504	0.194096	0.468161
0.749248	0.371874	0.504329	0.370572	0.391083	0.394503	0.997731	2.67937e-06	0.980118	0.184504	0.00923714	0.00225181	0.573471	0.357996	0.983014	0.253834	0.127505	0.248283
0.93943	0.229694	0.685898	0.516212	0.481409	0.101045	0.999932	0.000100486	0.623358	0.200262	0.318442	0.0579204	0.603757	0.541727	0.55302	8.68638e-05	0.0858625	0.413797
0.322185	0.328781	0.393236	0.122485	0.667942	0.122588	0.000595172	0.027616	0.863127	0.708929	0.0252633	0.232276	0.490739	0.203047	0.238113	0.00379021	0.0372881	0.120007
0.97428	0.16439	0.368962	0.121147	0.824327	0.408157	0.00956986	1.19539e-05	0.475231	0.288419	0.999475	0.00665221	0.750366	0.339275	0.856345	0.00986139	0.131758	0.384926
0.263284	0.388153	0.44609	0.373119	0.35966	0.271831	0.830989	0.268299	0.452016	0.00437919	0.495277	0.442214	0.361855	0.106116	0.768456	0.270744	0.390509	0.316468
0.864182	0.146948	0.738765	0.252179	0.712031	0.00826837	5.09355e-05	0.00157359	0.868458	0.0624416	0.215096	0.248862	0.48655	0.349565	0.356389	0.068085	0.732031	0.322076
0.491946	0.182765	0.70981	0.618259	0.368521	0.368444	0.0205722	0.000193986	0.451178	0.33443	0.434563	0.00574992	0.601244	0.411848	0.0525034	0.0180561	0.0977981	0.342888
0.220934	0.129753	0.468625	0.308764	0.955503	0.0567558	0.969721	0.552891	0.554489	0.323247	0.05947	0.241634	0.427678	0.295441	0.630175	0.113619	0.418222	0.344398
0.22514	0.0660603	0.480253	0.309336	0.435939	0.249153	0.94886	3.9172e-05	0.389608	0.00368032	8.80151e-05	0.00017803	0.543875	0.314208	0.217264	0.0322679	0.211139	0.238282
0.293793	0.366371	0.432316	0.3729	0.0712887	0.880263	0.000151209	1.56263e-05	0.461472	0.392389	0.159048	0.0692935	0.889535	0.364884	0.425359	0.165961	0.22981	0.345526
0.429378	0.0268353	0.357563	0.326787	0.415281	0.00584925	0.94321	0.000261797	0.562378	0.0996703	0.974332	0.112661	0.440622	0.390046	0.0255483	0.176339	0.34559	0.038573
0.900005	0.0822232	0.476982	0.292363	0.144423	0.11636	0.0614068	0.004031	0.716627	0.356702	0.111691	0.345987	0.563062	0.396454	0.449703	0.173136	0.463238	0.236282
0.416375	0.0159304	0.55975	0.536034	0.552038	0.0028729	0.990488	0.00113393	0.902633	0.247116	0.0604674	0.150349	0.450011	0.213524	0.762479	0.195097	0.141213	0.385752
0.543585	0.028968	0.433328	0.149728	0.726582	0.0642886	0.0481607	0.00194855	0.652623	0.335787	1	0.47231	0.395093	0.45093	0.96222	0.0982223	0.531955	0.344393
0.264543	0.138894	0.485386	0.191332	0.83924	0.119534	0.99768	0.81677	0.531248	0.249209	0.257462	0.508963	0.439557	0.0890218	0.0504976	0.0706655	0.173921	0.268979
0.507044	0.173094	0.719079	0.0628218	0.79357	0.043542	0.623483	0.00434521	0.523552	0.427787	0.0612442	0.000202645	0.545551	0.29449	0.189951	0.0178076	0.272446	0.285388
0.599445	0.00356009	0.503998	0.475718	0.50116	0.188325	0.997911	1.29747e-05	0.187615	0.021685	0.486172	0.017395	0.471482	0.326265	0.531751	0.183418	0.353094	0.328528
0.423646	0.321005	0.51011	0.376446	0.402473	0.0363434	0.914988	0.000981926	0.403173	0.245129	1.70645e-06	0.0249334	0.504072	0.353417	0.00574186	0.116456	0.343279	0.339714
0.269826	0.0580699	0.826927	0.349045	0.385839	0.206727	0.00123607	0.411786	0.870216	0.249094	0.0198958	1.32426e-05	0.417882	0.366698	0.527196	0.072843	0.194372	0.294921
0.581441	0.217414	0.396312	0.0306199	0.442309	0.000840403	0.99684	0.165708	0.525395	0.00265102	0.238126	0.0321303	0.630414	0.155018	0.263383	0.020704	0.619599	0.150366
0.324547	0.118397	0.637545	0.371601	0.794269	0.264099	0.986709	0.0147965	0.223468	0.362472	0.0284259	0.000274314	0.435428	0.122872	0.0337959	0.390202	0.811607	0.340708
0.954018	0.283355	0.709008	0.0270134	0.76661	0.0148352	1	6.94727e-05	0.471696	0.476602	0.981002	0.228789	0.525802	0.46443	0.263586	0.0123115	0.416351	0.327063
0.153772	0.309724	0.480399	0.30411	0.625657	0.0280941	0.00167513	0.790293	0.527031	0.27858	0.0481509	9.64196e-09	0.478003	0.403403	0.034314	0.300137	0.357673	0.274758
0.398977	0.433005	0.424844	0.120923	0.374885	0.00578352	0.993586	0.951904	0.661616	0.359772	0.804009	0.130568	0.507358	0.376283	0.540945	0.00135104	0.19937	0.221309
0.427155	0.0582867	0.424896	0.468277	0.520522	0.00313937	0.00428872	0.000383486	0.332226	0.510203	0.359223	0.00334877	0.401012	0.392085	0.999669	0.111213	0.153762	0.29215
0.535061	0.00924484	0.560909	0.15416	0.679342	0.0494193	1	2.97796e-05	0.270502	0.229521	0.00190306	0.0739002	0.71366	0.30492	0.154216	0.0390256	0.289745	0.245436
0.618704	0.0347989	0.385393	0.110272	0.494578	0.37524	2.20146e-06	0.995723	0.461429	0.206081	0.921696	6.25156e-05	0.668902	0.344141	0.985159	0.000288557	0.475778	0.081018
0.258418	0.363203	0.532562	0.0863091	0.356109	0.252468	0.535946	0.00249002	0.314096	0.216164	0.342069	0.0600278	0.351703	0.467439	0.036844	2.25789e-05	0.139119	0.234918
0.295167	0.0142093	0.478142	0.115744	0.0521881	0.306092	0.999982	8.73783e-05	0.419296	0.00232364	0.386741	0.221778	0.488215	0.321683	0.0306853	0.0281011	0.185479	0.348832
0.245964	0.148941	0.402563	0.165589	0.318403	0.0730673	2.36668e-05	0.0013484	0.53043	0.382666	0.074595	0.107804	0.433222	0.184128	0.575922	9.96952e-05	0.382203	0.324488
0.323574	0.0490687	0.701168	0.287528	0.45294	0.0707989	0.000318326	5.30748e-07	0.212075	0.411538	0.0174125	0.301458	0.563465	0.486776	0.890151	0.0864633	0.344676	0.327041
0.720288	0.355763	0.598505	0.736257	0.463111	0.170888	0.00735517	2.06834e-05	0.372764	0.303533	0.082022	0.0599329	0.593889	0.143583	0.557904	0.0790076	0.313902	0.343928
0.225068	0.0931783	0.439539	0.385288	0.891369	0.0489737	0.00732009	0.000799685	0.587432	0.149174	0.209681	0.370762	0.628217	0.421739	0.880795	0.0274898	0.318039	0.34674
0.680081	0.01374	0.517961	0.315529	0.655491	0.123691	0.697565	0.00301627	0.548602	0.385038	0.526406	0.339302	0.457893	0.449967	0.0306514	4.61487e-05	0.401752	0.305312
0.209621	0.299752	0.60797	0.625052	0.290083	0.106193	0.982571	0.0898958	0.473448	0.440439	0.00010425	0.251799	0.237103	0.285964	0.644514	0.0980235	0.314571	0.233243
0.303139	0.233216	0.807738	0.384781	0.480311	0.0421685	0.968137	0.161485	0.391382	0.425935	0.330374	0.0879925	0.526776	0.478538	0.968632	0.00347177	0.610868	0.178553
0.823288	0.206833	0.752969	0.158044	0.83361	0.12686	0.990831	0.00031345	0.417812	0.564022	0.826791	0.258928	0.495066	0.446554	0.954056	0.0916841	0.0877525	0.254817
0.870961	0.157815	0.492556	0.254388	0.506127	0.0880025	0.4559	9.25301e-08	0.266812	0.292064	0.581795	0.0791634	0.683419	0.237214	0.0101464	0.265762	0.193455	0.420531
0.404559	0.267674	0.679416	0.429143	0.454591	0.12939	0.00229627	0.592175	0.999833	0.372742	0.319586	0.15996	0.669199	0.217163	0.463881	0.0234597	0.0973757	0.118045
0.355366	0.174136	0.467323	0.193958	0.416737	0.0931271	0.792215	0.986734	0.576635	0.404902	0.596935	0.579745	0.817101	0.334905	0.305792	0.0749662	0.352104	0.179878
0.651068	0.113621	0.636844	0.457898	0.37039	0.0008209	0.258559	0.0480272	0.560021	0.391765	0.542017	0.29844	0.445408	0.316871	0.559348	0.165689	0.30871	0.144953
0.395402	0.253315	0.0333426	0.308237	0.500615	0.282771	0.97631	0.000312842	0.348413	0.387262	0.463392	0.0011468	0.391825	0.304406	0.230887	0.00506285	0.507755	0.303015
0.24474	0.316316	0.145577	0.174816	0.674422	0.0278455	0.917602	0.00030848	0.6339	0.148369	0.0292872	1.90623e-06	0.588666	0.271349	0.0895979	0.000952621	0.314681	0.460689
0.642184	0.387251	0.475895	0.383619	0.461952	0.472257	0.000626902	0.00274881	0.734111	0.406696	0.547505	0.147844	0.51	0.425295	0.0495307	0.0819189	0.147943	0.284285
0.721726	0.0385676	0.371379	0.150245	0.601001	0.292297	0.911398	0.00320542	0.578379	0.241009	0.673552	1.96552e-08	0.534303	0.363315	0.321172	0.153693	0.381602	0.357025
0.712026	0.467621	0.676765	0.406611	0.236369	0.110482	0.000322444	3.49732e-05	0.970754	0.284487	0.430055	0.000726798	0.426737	0.338821	0.611205	0.018249	0.394867	0.287825
0.336136	0.194281	0.0372334	0.0558842	0.544227	0.165155	0.000404828	0.213288	0.720393	0.414672	0.16305	0.034928	0.297643	0.353233	0.997316	0.035382	0.32281	0.401348
0.0908493	0.449266	0.535421	0.0515966	0.490937	0.0165536	0.980348	0.00403138	0.526379	0.572758	0.000434017	0.308784	0.46027	0.21364	0.110457	0.000171268	0.0804041	0.287477
0.67951	0.301149	0.205179	0.426122	0.710869	0.122358	0.257024	0.0895268	0.577958	0.368027	0.258544	0.301039	0.342552	0.135443	0.0469462	0.0460275	0.193208	0.289052
0.574893	0.49241	0.694376	0.527336	0.613932	0.0367879	4.28172e-05	0.0154224	0.684101	0.213303	0.534061	0.240929	0.375681	0.452253	0.146665	0.112265	0.437058	0.0964741
0.36769	0.240733	0.508724	0.231137	0.351429	0.154827	5.86128e-06	1.20966e-05	0.528196	0.461462	0.0384839	0.166118	0.428031	0.254586	0.214138	0.139362	0.0021415	0.488734
0.879307	0.0713967	0.29268	0.292196	0.315717	0.183129	1.04103e-05	2.38377e-06	0.996514	0.516184	0.0161847	0.128694	0.454411	0.274444	0.28123	1.57392e-05	0.302881	0.403827
0.831395	0.459472	0.425973	0.189307	0.528375	0.321761	0.999995	1.29494e-06	0.527747	0.209705	0.98652	0.436501	0.547657	0.570702	0.55302	0.000417199	0.124686	0.27285
0.0401852	0.173336	0.563026	0.306699	0.48122	0.00314354	0.967215	0.000413204	0.527034	0.432936	0.99316	0.331028	0.307938	0.240828	0.222554	0.218743	0.135876	0.306726
0.230265	0.0117973	0.466332	0.414137	0.0936014	0.00156927	0.579307	0.267329	0.557639	0.39803	0.0615693	0.000831658	0.403292	0.14885	0.584363	0.0471154	0.428147	0.317718
0.606606	0.207477	0.58871	0.215626	0.52044	0.386278	0.999795	0.924296	0.443253	0.273681	0.00221941	0.000234236	0.486778	0.400558	0.971447	0.0693144	0.133757	0.251109
0.619998	0.100463	0.599555	0.217465	0.329407	0.0986877	0.998243	0.0325272	0.339615	0.12374	0.161893	0.0168315	0.437848	0.352245	0.0243392	0.0779828	0.653531	0.169476
0.938393	0.320853	0.778677	0.159437	0.958096	0.162648	0.998784	0.00133817	0.417643	0.434058	0.944468	0.0330119	0.536369	0.331596	0.921804	2.85059e-05	0.440314	0.277947
0.210628	0.19549	0.458265	0.376446	0.30181	0.140299	0.0532288	0.00424914	0.467266	0.192838	0.827575	0.0807243	0.322492	0.319714	0.216791	0.0769885	0.548618	0.307541
0.447081	0.0219236	0.549914	0.217327	0.171412	0.869964	0.99881	2.75528e-07	0.614427	0.000663233	0.423325	0.138495	0.499649	0.363698	0.0201918	0.117389	0.311378	0.301971
0.439197	0.125698	0.394635	0.17725	0.363838	0.328355	0.997099	1.53658e-06	0.477345	0.326521	0.00311534	0.0173969	0.754422	0.369778	0.0137078	0.118645	0.497149	0.212842
0.411216	0.00929513	0.49552	0.238561	0.305706	0.248342	0.999991	0.646054	0.365766	0.40644	0.115452	0.0994749	0.530977	0.496612	0.882118	0.478627	0.145919	0.171829
0.66731	0.00476496	0.424492	0.238852	0.265126	0.0441978	0.0180722	0.00756084	0.921379	0.36167	0.677256	0.395762	0.502361	0.320936	0.158005	0.185146	0.220688	0.42396
0.458322	0.377263	0.437153	0.24931	0.545981	0.0965654	0.114541	3.07963e-05	0.453742	0.34964	0.0407111	0.029056	0.108781	0.244479	0.419831	0.138667	0.347788	0.347626
0.480061	0.0889432	0.504064	0.144108	0.242417	0.0962836	0.698195	8.74109e-05	0.457626	0.324325	0.015674	0.0371774	0.361617	0.424349	0.624527	0.0243125	0.363989	0.291969
0.20218	0.165629	0.526192	0.457742	0.398917	0.180088	0.819642	6.727e-06	0.404319	0.507562	0.543538	0.335563	0.596063	0.422137	0.628151	0.106904	0.163933	0.31692
0.286649	0.0592778	0.534953	0.503258	0.0523133	0.345963	0.99917	0.00866713	0.542201	0.377091	0.543705	0.00144121	0.370308	0.250452	0.851147	0.0772498	0.457551	0.257362
0.699035	0.285787	0.80473	0.345004	0.938144	0.0774237	0.999994	2.27635e-06	0.0766119	0.726044	0.514537	0.365545	0.430488	0.118765	0.341521	0.141323	0.157843	0.203263
0.56899	0.0119561	0.556367	0.263159	0.460419	0.065098	0.906799	9.3125e-05	0.972858	0.40593	0.657934	0.00897138	0.624777	0.223348	0.209669	0.211383	0.110171	0.234646
0.722539	0.239816	0.619334	0.280679	0.480189	0.0113693	0.519932	4.42601e-05	0.999456	0.00424242	0.450473	0.332359	0.52637	0.22807	0.989977	0.220177	0.171844	0.257513
0.47754	0.00181443	0.404938	0.364148	0.347849	0.131561	7.64227e-08	0.000128057	0.400609	0.191331	0.710969	0.956257	0.659642	0.271741	0.238381	0.00107853	0.373519	0.337009
0.548585	0.0614844	0.647991	0.127414	0.560391	0.0211442	0.999978	6.43295e-05	0.531479	0.183323	0.819594	0.4508	0.410191	0.377806	0.0319517	0.16656	0.133389	0.451764
0.425745	0.144802	0.45799	0.385509	0.723102	0.0253016	0.0011957	0.00164505	0.151785	0.359493	0.000204996	0.341852	0.436808	0.422541	0.461784	0.235337	0.283064	0.125471
0.52384	0.33824	0.543392	0.394119	0.20519	0.0648076	0.845204	0.000890252	0.593877	0.0099895	0.132042	0.00213653	0.474423	0.350061	0.35071	3.00916e-05	0.193233	0.0787231
0.420646	0.0784786	0.474362	0.174802	0.340873	0.0644045	0.9642	3.29525e-05	0.449062	0.419576	0.116691	0.265919	0.390662	0.115779	0.517019	0.0726699	0.0390808	0.0893475
0.555837	0.0889616	0.469685	0.0620332	0.579977	0.49153	0.972263	5.97727e-06	0.465968	0.0833347	0.0199419	0.227043	0.446692	0.365686	0.592971	0.0027127	0.229149	0.395804
0.648279	0.297749	0.472096	0.462777	0.771841	0.211193	0.0946729	0.00140228	0.532316	0.507001	0.0544773	0.0871669	0.700125	0.472981	0.219171	0.0355653	0.261699	0.269675
0.384538	0.392961	0.371802	0.3708	0.151252	0.000940375	0.036851	3.59214e-07	0.455909	0.380725	0.00144024	0.021886	0.624597	0.530509	0.255527	0.062475	0.225962	0.0760704
0.790958	0.333214	0.45315	0.292185	0.687195	0.0526554	0.999997	0.0070881	0.47403	0.448126	9.93456e-05	0.0138787	0.47451	0.416633	0.807279	0.365317	0.388633	0.462445
0.34914	0.0061576	0.506679	0.390104	0.97572	0.0731014	0.931896	1.06573e-06	0.388268	0.268879	0.541852	0.464522	0.502416	0.444006	0.846077	0.00344489	0.362174	0.346871
0.663383	0.184877	0.474909	0.255138	0.359831	0.0552043	0.622399	6.86907e-05	0.393945	0.486471	0.245757	0.156263	0.470081	0.406953	0.472381	0.0975619	0.223822	0.185573
0.386621	0.323265	0.713684	0.0595281	0.370727	0.309759	0.932292	0.0120078	0.517691	0.304508	0.352258	0.123694	0.521157	0.333932	0.932803	0.198671	0.734074	0.236225
0.684702	0.371806	0.454235	0.356241	0.57481	0.0997691	0.00305628	0.000261733	0.402948	0.258412	0.00995287	0.102022	0.505379	0.155196	0.869175	0.136835	0.384317	0.250891
0.926643	0.0575305	0.289222	0.444752	0.522215	0.0214807	0.973539	0.866389	0.460024	0.472683	0.0124438	0.244112	0.692596	0.502507	0.354101	0.00717885	0.230366	0.0668949
0.686745	0.100993	0.679933	0.273253	0.327708	0.0293787	0.993558	0.0171586	0.430549	0.383382	0.625345	0.490206	0.543004	0.31152	0.185251	0.000316741	0.384173	0.184687
0.533649	0.407831	0.743366	0.584683	0.309708	0.0582248	0.00147306	0.000380453	0.563066	0.439508	0.395352	0.232605	0.555528	0.382308	0.0447237	0.00163258	0.439417	0.610858
0.531366	0.347897	0.458917	0.148942	0.762541	0.00149334	9.70671e-05	0.000330451	0.143117	0.604555	0.459706	0.31328	0.34161	0.455998	0.0945422	0.0556658	0.273593	0.323329
0.633817	0.194219	0.363265	0.294756	0.935638	0.0302804	0.782997	0.00693538	0.505849	0.626216	0.223553	0.202067	0.464573	0.363093	0.114815	0.0441046	0.344454	0.949218
0.88864	0.0132863	0.696176	0.49875	0.395818	0.116649	0.0150126	0.408363	0.382289	0.0172036	0.708021	0.0244527	0.521453	0.474444	0.757844	0.231228	0.19453	0.185513
0.396253	0.243135	0.710726	0.189355	0.702702	0.108935	0.947028	0.979153	0.606492	0.00766992	0.770334	0.144942	0.341445	0.576968	0.999925	0.000137589	0.877936	0.422798
0.274711	0.393974	0.601703	0.0964207	0.872674	0.0367192	0.998632	9.16221e-06	0.384744	0.52258	0.0676974	0.387614	0.546213	0.466483	0.978834	0.00120058	0.13568	0.0599743
0.689036	0.12915	0.520592	0.268257	0.288536	0.0536084	0.999991	0.497811	0.677677	0.197546	0.98458	1.58946e-06	0.523235	0.282434	0.177754	0.115438	0.312275	0.110614
0.351364	0.211501	0.784616	0.382133	0.161891	0.402222	0.00943329	1.95839e-05	0.231141	0.45353	0.0964306	0.0543278	0.53323	0.479244	0.214825	0.0708587	0.237149	0.0795936
0.0614299	0.503634	0.74884	0.432845	0.889963	0.323265	0.99919	0.00202308	0.208865	0.570623	0.534107	0.148478	0.966549	0.187102	0.107094	0.0403874	0.219748	0.401913
0.576901	0.116728	0.445167	0.0718284	0.711499	0.086893	0.999988	2.22093e-05	0.98234	0.398163	0.153082	0.475821	0.653749	0.29343	0.959814	0.256682	0.298222	0.434352
0.351661	0.190115	0.0375688	0.0163501	0.737751	0.0244013	0.988047	1.83211e-06	0.4774	0.318052	0.891006	0.449974	0.473887	0.212046	0.343825	0.110145	0.200758	0.297641
0.549895	0.221527	0.543392	0.396186	0.481565	0.0694427	0.871928	0.00531783	0.409125	0.567156	0.687392	0.0245462	0.453127	0.12188	0.825464	0.0758641	0.337653	0.275438
0.413131	0.225002	0.479186	0.10524	0.0959929	1.95214e-05	0.834483	0.00548386	0.474213	0.421459	0.0145086	0.00539515	0.604317	0.423604	0.154751	0.00776486	0.234211	0.248124
0.200728	0.057515	0.455516	0.345004	0.212016	0.135538	0.982571	0.0290984	0.532308	0.218673	1	0.378136	0.209653	0.44411	0.125998	0.0341101	0.340557	0.0835099
0.76425	0.313041	0.546569	0.0458508	0.224995	0.0377859	0.00448873	0.000420137	0.516218	0.219547	0.00560266	0.00198543	0.476864	0.518017	0.421392	0.0237031	0.460263	0.419616
0.601932	0.842622	0.696021	0.323319	0.538036	0.103384	0.987604	0.873785	0.492809	0.182035	0.335856	0.522029	0.454234	0.433442	0.277996	0.000100023	0.246202	0.17256
0.859582	0.027639	0.444665	0.437176	0.380859	0.000620538	3.36337e-05	0.000372933	0.437106	0.193901	0.615565	5.0922e-06	0.332637	0.257438	0.0969894	0.0535156	0.249511	0.28082
0.724499	0.0477965	0.314059	0.467859	0.27551	0.0858267	0.0066847	0.000147154	0.266364	0.214927	0.262142	0.323868	0.178203	0.414468	0.133541	0.07401	0.471073	0.526977
0.270941	0.412475	0.589989	0.150006	0.0729855	0.338471	8.26036e-05	0.0121401	0.438765	0.105242	0.32011	0.0161444	0.43858	0.250485	0.999714	0.0160957	0.45486	0.221761
0.380864	0.218458	0.581003	0.369488	0.401853	0.287095	0.601063	0.000101855	0.453696	0.369825	0.211571	0.425563	0.526361	0.449606	0.415875	0.135099	0.713126	0.133081
0.835617	0.168116	0.469642	0.0463567	0.05057	0.503097	0.147012	2.3517e-05	0.47969	0.409999	0.27958	0.320969	0.392584	0.263976	0.127742	0.0782634	0.103213	0.200326
0.465777	0.326326	0.0492767	0.301995	0.522601	0.125644	0.0114998	5.00105e-05	0.346199	0.439367	0.914312	0.42573	0.538995	0.403022	0.522457	0.147073	0.113566	0.230292
0.281699	0.188036	0.582387	0.0950088	0.997948	0.00115035	0.00117757	3.92952e-06	0.447267	0.157316	0.628616	0.321331	0.427286	0.333216	0.969014	0.417542	0.174021	0.367054
0.2681	0.19583	0.483273	0.529219	0.602202	0.124817	0.000518159	0.0975611	0.215794	0.208436	0.0400261	0.40428	0.460024	0.44024	0.854366	0.00357478	0.351253	0.083067
0.393624	0.332014	0.486982	0.334445	0.632159	0.109834	0.026077	0.796825	0.410236	0.47181	0.929635	0.113216	0.488087	0.428521	0.206405	0.0761992	0.283173	0.271243
0.108662	0.0918904	0.75881	0.16353	0.989874	0.0549832	0.926963	0.000171986	0.369876	0.369851	0.0112896	0.0491264	0.32644	0.309063	0.0917125	0.316337	0.319792	0.104146
0.596218	0.183898	0.575116	0.449413	0.749269	0.0413381	0.999622	0.00642059	0.607565	0.193045	0.350116	0.0460654	0.553295	0.378652	0.942319	0.226311	0.211678	0.22997
0.585573	0.236735	0.580157	0.0597556	0.535732	0.0872476	0.974966	0.0106092	0.570454	0.226807	0.852134	0.0858732	0.614401	0.48155	0.922064	0.184546	0.486756	0.14592
0.360865	0.0170986	0.5134	0.420781	0.182193	0.0157588	0.935164	1.95839e-05	0.977107	0.284053	0.228313	0.202284	0.59643	0.370364	0.750737	0.0791309	0.276084	0.304471
0.885027	0.24619	0.269637	0.508833	0.481935	0.316957	0.756096	0.00276592	0.637674	0.474684	0.00158938	0.333778	0.274844	0.286586	0.930537	0.341549	0.36448	0.353061
0.356333	0.0480607	0.371345	0.433257	0.0151383	0.0415745	0.02475	0.399156	0.477992	0.325169	0.0186893	0.243267	0.400469	0.342644	0.983972	0.00579555	0.31915	0.356374
0.870797	0.387324	0.513096	0.419865	0.350293	0.119973	0.999206	0.00157933	0.447512	0.377262	0.526732	0.386545	0.512659	0.270234	0.0874694	0.136522	0.173033	0.242658
0.529023	0.297851	0.474742	0.351746	0.19471	0.044274	6.95855e-07	1.01107e-06	0.775605	0.301663	0.437306	0.0558896	0.446022	0.22905	0.919769	0.708608	0.338531	0.0736157
0.517856	0.204682	0.403731	0.0471476	0.838384	0.137739	7.50953e-06	1.91592e-05	0.473673	0.142778	0.158622	0.0879855	0.202222	0.407181	0.490985	0.0653365	0.492234	0.19786
0.515356	0.386946	0.560734	0.27833	0.848436	0.00631482	0.99961	0.00201792	0.480326	0.390958	0.0558169	0.43374	0.877668	0.292089	0.999988	0.000239116	0.0902333	0.262671
0.356868	0.02654	0.407038	0.365281	0.579067	0.000681719	0.0633741	6.55344e-06	0.550912	0.509583	0.0569315	0.132626	0.691049	0.246123	0.9921	0.178148	0.208304	0.215011
0.469986	0.299811	0.342106	0.216052	0.76677	0.10713	0.999643	2.63644e-05	0.600406	0.0166637	0.420014	0.359615	0.557214	0.504997	0.0533988	0.1668	0.355457	0.384311
0.437542	0.170097	0.524632	0.26435	0.653246	0.000118733	0.99276	0.000233133	0.493548	0.0697288	0.490172	0.270745	0.344696	0.767295	0.0673022	0.119767	0.0883034	0.37059
0.557656	0.346173	0.763076	0.185999	0.494226	0.316211	0.999754	1.72221e-05	0.973382	0.315802	0.105379	0.0282972	0.574211	0.450556	0.999796	0.262068	0.136728	0.427217
0.415225	0.284495	0.579078	0.254291	0.371835	0.107396	0.382151	0.00310227	0.542183	0.127268	0.0916445	0.000273182	0.458359	0.24877	0.956652	0.099651	0.404581	0.235406
0.137878	0.153268	0.767081	0.114487	0.427035	0.0792546	0.0357605	0.091028	0.941753	0.421729	0.133354	0.153265	0.433162	0.46901	0.867297	0.0569506	0.0652118	0.043488
0.43497	0.293158	0.47184	0.133373	0.26065	0.189119	0.0247029	0.106761	0.499891	0.218937	0.0132406	0.0278726	0.42746	0.513319	0.398365	0.287659	0.000700715	0.234918
0.53322	0.109397	0.37256	0.044783	0.577675	0.111165	1.48707e-06	0.228832	0.407846	0.387581	0.612835	0.00151287	0.621091	0.368062	0.403039	2.49046e-05	0.220828	0.387298
0.618008	0.340716	0.456478	0.35652	0.828495	0.0223936	0.97279	0.964893	0.984212	0.325858	1	0.194969	0.455445	0.446991	0.126722	0.199578	0.283976	0.265876
0.459099	0.490414	0.505019	0.234695	0.250314	0.126703	0.330477	4.58129e-08	0.906831	0.430569	0.774406	9.90597e-06	0.245768	0.11384	0.0884786	0.060465	0.438883	0.193133
0.496498	0.187785	0.251229	0.438844	0.336596	0.203481	0.916475	0.0010199	0.393915	0.249508	0.00258595	0.0646959	0.166057	0.296214	0.0833829	0.0837843	0.173896	0.327218
0.492207	0.168615	0.578717	0.446558	0.598579	0.427076	0.778453	0.0352948	0.239243	0.224145	0.330978	0.0117553	0.743074	0.285516	0.25196	0.0167647	0.504072	0.350697
0.294098	0.283544	0.206163	0.482042	0.875628	0.378248	0.675952	0.102858	0.969627	0.382145	0.336472	0.0631815	0.586487	0.396598	0.24946	0.245065	0.111249	0.337808
0.909297	0.152793	0.387376	0.486053	0.488979	0.000195783	0.986394	0.723292	0.475626	0.523639	0.553888	0.115485	0.724986	0.409602	0.450792	0.0479682	0.332987	0.230708
0.439418	0.251943	0.767789	0.063328	0.553406	0.124312	0.964247	0.182955	0.472708	0.366014	0.00399797	0.00717057	0.33603	0.394471	0.901129	0.0840088	0.174157	0.234521
0.341252	0.196314	0.454235	0.572871	0.554767	0.04143	0.982861	0.213749	0.73934	0.327904	0.806832	0.000599885	0.779014	0.101478	0.0245243	0.0335842	0.285387	0.290088
0.315714	0.283491	0.271123	0.249405	0.442062	0.00234528	0.0102897	0.0152631	0.431608	0.227934	0.584342	0.0864953	0.561312	0.384242	0.0445815	0.0286619	0.0625588	0.230877
0.317778	0.284232	0.499975	0.420239	0.691287	0.172924	0.578775	3.88254e-07	0.422382	0.393549	0.658982	0.0240273	0.359998	0.183582	0.23702	0.000606819	0.187097	0.126045
0.587816	0.256575	0.687798	0.109359	0.139528	0.000655708	0.0266565	0.0128547	0.217548	0.318117	0.0795538	0.0595879	0.431021	0.46106	0.947127	0.179625	0.20238	0.269245
0.441128	0.408266	0.37534	0.284914	0.638054	0.143578	8.6087e-06	0.914553	0.506418	0.19996	0.362717	0.176822	0.457381	0.734046	0.051691	0.161763	0.122561	0.317366
0.577061	0.178678	0.87222	0.497883	0.686638	0.0136313	0.943697	0.231045	0.278492	0.359054	0.0036808	1.10896e-05	0.533138	0.349827	0.34644	0.120061	0.217451	0.478167
0.225976	0.223968	0.270855	0.355536	0.236429	0.485353	2.43704e-05	0.00155489	0.697622	0.321325	0.401687	0.00335136	0.555347	0.271167	0.847156	0.202748	0.517216	0.601511
0.656237	0.252349	0.315692	0.300382	0.414463	0.108829	0.996786	0.110522	0.409001	0.112568	0.252577	0.185148	0.39861	0.283958	0.820957	0.0185823	0.178995	0.221323
0.81054	0.00012161	0.630168	0.311966	0.633845	0.109007	0.999893	0.995801	0.364036	0.237245	0.219659	0.333141	0.404687	0.340069	0.415044	0.360159	0.0895236	0.349432
0.181451	0.217072	0.815408	0.469609	0.3098	0.187585	0.977298	0.932775	0.471654	0.246396	0.396263	0.114013	0.380439	0.357351	0.409621	0.0442831	0.483884	0.271975
0.375505	0.228692	0.755939	0.250695	0.74341	0.0578711	0.0776247	0.00287312	0.169912	0.498534	0.982296	0.450524	0.724668	0.292992	0.288206	0.0266566	0.348865	0.587901
0.328813	0.440363	0.843229	0.442019	0.567405	0.0270798	0.973488	0.925189	0.418573	0.332877	0.000269399	0.340265	0.77962	0.292485	0.334991	0.0117841	0.343984	0.177085
0.378683	0.285199	0.357115	0.161996	0.56659	0.0119338	0.995245	0.00133984	0.662956	0.141707	0.0316381	0.308583	0.783395	0.353615	0.55397	0.0337435	0.0265072	0.151318
0.0691367	0.188237	0.496125	0.110991	0.441964	0.142021	2.13115e-07	0.940979	0.251771	0.257326	0.107484	0.000321712	0.529804	0.365369	0.353337	0.344536	0.339167	0.056701
0.327662	0.256284	0.197583	0.180026	0.528196	0.00972828	0.999935	0.999161	0.6367	0.250068	0.369221	0.379826	0.520073	0.261624	0.26765	0.121486	0.61359	0.133149
0.276491	0.385513	0.375947	0.354013	0.709	0.0706971	0.785567	0.0244724	0.256369	0.334353	0.0151086	9.96516e-05	0.329084	0.477719	0.0576456	0.591985	0.267476	0.310306
0.634386	0.278189	0.230378	0.100522	0.449097	0.056145	0.908669	0.0016874	0.43947	0.44601	0.226322	0.0085665	0.469534	0.360167	0.422244	0.19457	0.367721	0.197252
0.381606	0.227198	0.207213	0.0382238	0.74755	0.446962	0.99711	0.111142	0.434798	0.303803	0.0169633	0.415828	0.807865	0.26588	0.833445	0.00277871	0.310073	0.24783
0.441326	0.380167	0.591096	0.462777	0.561586	0.312151	0.00428601	0.000108414	0.603426	0.192374	0.0638447	0.370002	0.357798	0.26213	0.941985	0.00130771	0.356108	0.22867
0.256155	0.457612	0.551593	0.405567	0.598717	0.0577822	0.992428	0.0439627	0.447475	0.189788	0.584682	0.204013	0.450111	0.366776	0.999757	0.00473675	0.612838	0.185654
0.345409	0.345874	0.431903	0.394297	0.467026	0.139223	0.78132	0.000606814	0.18597	0.246594	0.0370269	0.258109	0.475378	0.311424	0.4676	0.279074	0.220482	0.517396
0.394425	0.227849	0.547597	0.0687015	0.447049	0.0189208	0.00894893	1.31709e-06	0.448998	0.475718	0.000106257	0.265238	0.411053	0.380938	0.117276	0.239022	0.39821	0.130573
0.456863	0.12397	0.527795	0.0874632	0.425955	0.0259966	0.000116571	0.00790051	0.537534	0.489071	0.0430538	0.0431081	0.524885	0.525371	0.15326	0.0670599	0.435507	0.0296938
0.613628	0.0618871	0.429698	0.344108	0.134756	0.116975	2.88876e-05	9.55701e-06	0.473975	0.55551	0.933988	0.0571378	0.731821	0.419464	0.110284	0.39691	0.340415	0.21112
0.599213	0.0475326	0.7155	0.0777335	0.413778	0.4274	0.557988	0.00218031	0.953984	0.468746	0.265651	0.188919	0.72219	0.304977	0.965292	0.00320865	0.0393563	0.260899
0.776958	0.278499	0.367467	0.493644	0.209902	0.0504263	0.99975	1.12068e-05	0.673437	0.343645	0.0161847	0.00447079	0.264958	0.146617	0.962287	0.259117	0.0529623	0.153605
0.40521	0.207014	0.689514	0.102757	0.316541	0.597619	0.967999	0.000550623	0.274053	0.494479	0.414179	0.000242307	0.814392	0.483311	0.480726	0.183992	0.304942	0.176366
0.448822	0.0626238	0.363764	0.333626	0.993749	0.0158843	0.374591	2.16733e-08	0.615164	0.534477	0.923682	0.0769364	0.551938	0.493603	0.968895	0.385859	0.166969	0.456125
0.471739	0.349925	0.731102	0.267865	0.648924	0.438842	0.000121905	0.677193	0.475186	0.066004	0.0434238	0.0339923	0.439282	0.412687	0.180981	0.221816	0.174121	0.271079
0.494876	0.230332	0.36085	0.197691	0.502333	0.0429978	0.853356	0.931241	0.533105	0.410511	0.760168	0.0587505	0.394482	0.97128	0.36387	0.0394771	0.294102	0.573385
0.597145	0.185838	0.236958	0.546036	0.430643	0.000344689	0.914317	0.00167297	0.37407	0.307624	0.905841	0.410432	0.29856	0.104897	0.965961	0.0311622	0.330175	0.274194
0.367182	0.0386999	0.62769	0.392338	0.336297	0.0414503	8.24714e-06	0.996647	0.578039	0.365194	0.168047	0.00970212	0.526217	0.152923	0.0767965	0.117503	0.4622	0.272356
0.202678	0.305332	0.278626	0.142472	0.668917	0.0726911	0.988873	0.0158758	0.748474	0.327507	0.897015	0.327727	0.496281	0.121013	0.813659	0.000816286	0.337945	0.575224
0.584104	0.227967	0.355237	0.0298861	0.469232	0.0955302	0.000181719	0.00411897	0.47247	0.463128	0.00516863	0.425134	0.675229	0.353166	0.67356	0.354474	0.623531	0.272282
0.495904	0.110576	0.507468	0.221187	0.180528	0.0789729	0.895307	2.32876e-07	0.417869	0.121039	0.0671586	0.393809	0.535303	0.326261	0.416562	0.123121	0.383485	0.19314
0.186224	0.201263	0.415062	0.309375	0.827148	0.105976	0.00230219	1.65145e-06	0.453872	0.366725	0.21706	0.402569	0.50348	0.35142	0.892723	1.29032e-05	0.200563	0.346114
0.785973	0.144819	0.432202	0.227328	0.537687	0.0861196	0.986172	0.000102926	0.0975521	0.348322	0.2328	0.462461	0.560108	0.319211	0.0635651	0.0850885	0.169704	0.210521
0.756648	0.199529	0.626984	0.243953	0.629985	0.0572909	0.000131644	1.72585e-06	0.61203	0.284939	0.128061	0.0543851	0.662488	0.414121	0.958214	0.00118886	0.101303	0.327193
0.591821	0.167899	0.316839	0.267476	0.579502	0.0630532	0.999922	1.55545e-06	0.377353	0.495743	0.257452	0.0293868	0.475784	0.122537	0.0117245	0.440277	0.266276	0.178852
0.358937	0.282197	0.0347782	0.142557	0.388483	0.14908	0.0115548	0.00413538	0.524007	0.189243	0.0146778	0.238823	0.446581	0.181222	0.248586	0.189822	0.0475465	0.415973
0.791539	0.115666	0.357892	0.219308	0.56606	0.247813	1.1058e-06	0.00123394	0.356857	0.359442	0.209174	0.185642	0.499179	0.280307	0.064443	0.143158	0.169863	0.35948
0.725012	0.138664	0.52292	0.395913	0.241535	0.0239798	0.993919	0.000568452	0.600347	0.3622	0.0687096	0.164035	0.260945	0.371723	0.678852	0.145265	0.058828	0.312891
0.350453	0.247508	0.410068	0.482042	0.456381	0.0826555	0.00280667	2.78938e-06	0.304889	0.63806	0.00732233	0.421603	0.60793	0.43275	0.672028	0.20449	0.409609	0.389953
0.535291	0.785629	0.505497	0.176939	0.918342	0.4006	0.994864	5.4335e-06	0.964834	0.393364	0.0792732	0.516316	0.404579	0.305739	0.140236	0.139455	0.0960008	0.276433
0.0510583	0.224677	0.571332	0.189307	0.440999	0.0465905	0.26203	0.178765	0.503908	0.22565	0.757942	0.00268272	0.425507	0.451961	0.866231	0.0731063	0.194178	0.462417
0.198919	0.375358	0.332508	0.0468099	0.640618	0.155842	0.381581	0.933737	0.982602	0.228239	0.676372	0.354667	0.198619	0.371716	0.59187	0.0829683	0.282724	0.436712
0.272731	0.182524	0.543086	0.20916	0.395534	0.287024	0.999342	0.000338843	0.278007	0.115704	0.543236	0.354865	0.477427	0.381047	0.540467	0.1723	0.195062	0.273777
0.373815	0.273906	0.605852	0.305666	0.38326	0.000873956	0.973414	2.63947e-05	0.484434	0.29336	0.328796	0.00262328	0.471639	0.197306	0.113432	0.145662	0.643353	0.180087
0.444784	0.00424723	0.49257	0.112829	0.0490123	0.0482785	0.993408	0.00206987	0.999597	0.40059	0.402864	0.333923	0.78982	0.448069	0.217975	0.069944	0.808406	0.409114
0.745771	0.143601	0.410996	0.23002	0.985844	0.0509215	0.973315	6.7854e-06	0.475379	0.378427	0.0113649	0.0390345	0.739846	0.414658	0.556427	0.480949	0.391359	0.450067
0.583297	0.0840999	0.656669	0.0705991	0.483982	0.310901	0.209419	0.000132041	0.766817	0.321137	0.466733	0.000272059	0.354065	0.301204	0.267093	0.07401	0.264901	0.446917
0.323471	0.0904123	0.576074	0.272646	0.721877	7.97667e-05	0.999559	4.44367e-06	0.467028	0.325671	0.896711	0.0817597	0.552224	0.583827	0.995887	0.0158002	0.499994	0.45292
0.425615	0.161224	0.56859	0.0531759	0.554535	1.1387e-05	0.761605	0.0139743	0.769276	0.364034	0.999999	0.090852	0.540688	0.355408	0.00104267	0.0187353	0.15289	0.130862
0.508498	0.294224	0.73307	0.313628	0.474581	0.0979151	0.0015897	0.38085	0.353161	0.432373	0.539853	0.0452721	0.503893	0.225404	0.169125	0.103201	0.269429	0.275992
0.539659	0.209229	0.530309	0.412751	0.852587	0.236718	0.921102	0.994823	0.353549	0.68282	0.574654	0.050198	0.581595	0.298731	0.0721171	0.388301	0.113939	0.34264
0.391056	0.460661	0.751066	0.289347	0.21983	0.0374292	0.0216699	0.000109992	0.764588	0.586495	0.454377	1.4118e-05	0.528538	0.223052	0.0578727	0.0217215	0.613954	0.340523
0.241446	0.0555609	0.49257	0.303073	0.221306	0.0292138	0.993955	0.00365948	0.563172	0.350433	0.414927	0.421768	0.524326	0.446422	0.441688	0.00396993	0.0197654	0.471715
0.740895	0.295731	0.36797	0.401176	0.179105	0.041615	0.190472	0.219553	0.993675	0.254329	0.636293	0.0031656	0.474178	0.268811	0.383065	0.046516	0.127487	0.27784
0.289159	0.0677745	0.196189	0.0751005	0.400097	0.059504	2.65584e-07	0.0121901	0.392549	0.409065	0.0278201	0.148245	0.680962	0.322359	0.968462	0.104646	0.104582	0.333558
0.345549	0.263035	0.459765	0.179833	0.978647	0.116013	0.999965	0.921963	0.504889	0.307899	1	0.151105	0.735676	0.187324	0.0323411	0.0322849	0.386112	0.308195
0.787387	0.46021	0.520775	0.162326	0.541877	0.365807	0.00899825	0.000215655	0.438271	0.145345	0.960815	0.432011	0.566173	0.31629	0.360072	0.0228602	0.400719	0.15059
0.276268	0.466658	0.449841	0.362258	0.452141	0.256962	2.57571e-05	0.000798164	0.774584	0.17691	0.0205556	0.302421	0.272717	0.303338	0.803019	0.00941686	0.380293	0.570682
0.671543	0.148341	0.667303	0.247803	0.403941	0.0741352	0.99477	0.000598699	0.463653	0.468715	0.422517	0.0894521	0.534987	0.456343	0.0187508	0.000174046	0.172796	0.374601
0.438615	0.289536	0.682362	0.302347	0.577192	0.0651679	0.138564	0.00173604	0.204315	0.181763	0.275453	0.00258299	0.682474	0.407283	0.164549	0.191746	0.499628	0.340854
0.520601	0.115943	0.853322	0.189307	0.384897	0.0642476	0.999923	0.999927	0.832051	0.28599	0.0312183	0.00520722	0.495118	0.431552	0.997644	0.167067	0.0790934	0.448231
0.652925	0.00459747	0.562867	0.21381	0.441743	0.25954	0.00427085	0.996464	0.495669	0.0840151	0.94127	0.0003638	0.50779	0.194545	0.294054	0.00307472	0.255218	0.27737
0.265069	0.222058	0.387082	0.085718	0.775647	0.856619	0.836258	0.108878	0.335719	0.214793	0.668277	0.0196499	0.536887	0.236911	0.999949	0.0425952	0.110012	0.317916
0.555283	0.227997	0.448566	0.273633	0.441183	0.161319	0.773949	0.0029984	0.435518	0.313396	0.0968558	0.590339	0.637923	0.18264	0.0699934	0.000134903	0.442088	0.344728
0.365792	0.0718406	0.646723	0.257422	0.999498	0.109023	0.997965	0.985145	0.176193	0.388057	0.0463019	0.000451536	0.710735	0.357763	0.998357	0.0010054	0.576056	0.29078
0.545976	0.0839739	0.685068	0.287385	0.246705	0.195081	0.110073	0.154413	0.463368	0.387365	0.46811	0.196084	0.388637	0.358564	0.781193	0.080306	0.0673325	0.512359
0.645005	0.18398	0.605862	0.326937	0.382731	0.0137434	0.903594	0.00168249	0.407384	0.255282	0.0713979	3.21911e-06	0.626136	0.298006	0.20918	0.116666	0.0434708	0.533371
0.521873	0.174928	0.396751	0.264021	0.647676	0.0241422	0.805733	0.104053	0.401899	0.393935	0.588381	0.139917	0.600941	0.22214	0.333441	0.56502	0.404905	0.246685
0.960542	0.467077	0.438657	0.111254	0.886712	0.0021948	0.999992	0.000712004	0.382102	0.117176	0.881931	0.216561	0.421969	0.158865	0.0405162	0.266075	0.166494	0.300455
0.554239	0.192402	0.467013	0.277988	0.393982	0.160731	0.000109053	0.000543313	0.361484	0.36899	0.123558	0.00133641	0.557128	0.282892	0.570376	0.0971941	0.225124	0.12838
0.310592	0.520249	0.417658	0.00536996	0.408383	0.055137	0.66256	0.00296327	0.428234	0.331089	0.547265	0.198718	0.474635	0.0843669	0.198566	0.0226109	0.306557	0.234911
0.609518	0.417904	0.581321	0.238953	0.513162	0.412876	1	6.77616e-06	0.524022	0.275298	0.0927917	0.00502701	0.731213	0.146698	0.395058	0.00542778	0.101864	0.206273
0.526397	0.15847	0.449001	0.373478	0.238349	0.253551	0.999278	1.35808e-09	0.474977	0.591469	0.0160553	0.286235	0.476725	0.243777	0.466193	0.102151	0.456743	0.104146
0.313061	0.0356642	0.475982	0.508392	0.476816	0.180128	0.459642	6.8198e-06	0.805116	0.439846	0.994744	0.34456	0.459293	0.298464	0.334802	0.0124266	0.542549	0.303638
0.45993	0.281083	0.563221	0.0401292	0.526492	0.016867	0.998925	0.000104638	0.125197	0.040393	0.261446	0.118102	0.507486	0.184253	0.761583	0.0307466	0.195359	0.284281
0.431505	0.43378	0.500524	0.117347	0.540232	0.231204	0.120094	0.000164115	0.536843	0.220419	0.241683	0.00962522	0.524315	0.422031	0.99535	0.0384487	0.310992	0.320858
0.334953	0.214009	0.117183	0.459684	0.711412	0.00520839	0.577324	0.525989	0.503625	0.0787577	0.285769	1.87043e-05	0.464383	0.246954	0.999905	0.00671417	0.307887	0.394904
0.213693	0.216246	0.54014	0.220883	0.338397	0.202685	0.0488042	1.35174e-05	0.374454	0.374064	0.0539522	0.259009	0.595205	0.36174	0.308579	0.0192403	0.579505	0.23746
0.668631	0.158513	0.653414	0.0298705	0.333632	0.0247908	0.000253652	3.05663e-07	0.992595	0.458308	0.33298	0.00193604	0.465918	0.340171	0.383176	0.124486	0.31331	0.388193
0.4607	0.119872	0.637737	0.148571	0.0106995	0.196441	0.0143723	0.0281078	0.316774	0.139243	0.0189468	0.230411	0.49471	0.459805	0.994706	0.0217556	0.0718631	0.392131
0.390194	0.089853	0.509523	0.516212	0.78515	0.067322	0.0894334	2.95078e-05	0.988695	0.090087	0.220297	0.605331	0.573097	0.196111	0.984451	0.0794633	0.241237	0.461159
0.22829	0.00927475	0.534919	0.287043	0.315998	0.0516939	0.0833669	0.997455	0.273195	0.126726	0.93414	0.0345636	0.481665	0.537253	0.0698288	0.0215268	0.145697	0.346069
0.729985	0.15538	0.495211	0.194108	0.406497	0.0206881	0.856013	0.000737279	0.650992	0.364004	0.003888	0.762114	0.72384	0.268559	0.789406	0.359073	0.569573	0.485359
0.64485	0.321262	0.297826	0.417924	0.949277	0.100667	8.1815e-05	0.0446084	0.478445	0.116462	0.966061	0.00253385	0.528289	0.319673	0.522866	0.222576	0.193885	0.212545
0.415996	0.237344	0.849821	0.245525	0.639783	0.300887	0.0399272	0.0392615	0.857318	0.0462461	0.581618	0.501791	0.591315	0.357164	0.342557	0.0239663	0.45532	0.299352
0.673623	0.273207	0.264129	0.235979	0.480073	0.0208622	0.73451	9.41554e-07	0.587738	0.529925	0.399179	0.399446	0.667968	0.473173	0.273955	0.0999877	0.252545	0.147042
0.352736	0.19616	0.625473	0.310175	0.448787	0.0229119	0.00278639	8.87804e-07	0.977397	0.448722	0.014461	0.0102357	0.364911	0.334751	0.313955	0.0117659	0.637197	0.349891
0.234386	0.292464	0.463367	0.244886	0.805447	0.00121815	0.00651525	4.30038e-05	0.453305	0.394754	0.0445126	0.000237458	0.416947	0.363431	0.0449754	0.138035	0.483274	0.184487
0.316522	0.227885	0.343257	0.41426	0.999698	0.258756	0.718806	7.2938e-05	0.387152	0.258042	0.154226	0.102858	0.482527	0.304746	0.0245471	0.0034335	0.305894	0.120011
0.471073	0.170908	0.750883	0.484897	0.162832	0.0268832	0.0220468	0.905347	0.490922	0.252639	0.054748	0.136359	0.341561	0.351527	0.0229025	0.157088	0.0903033	0.260022
0.46732	0.62569	0.442327	0.26932	0.849764	0.13094	0.998689	2.7612e-07	0.396075	0.271703	0.618352	0.00131245	0.468023	0.421406	0.484703	0.0288676	0.548243	0.16582
0.387634	0.440737	0.207063	0.455278	0.784272	0.00276145	0.998526	0.505376	0.508582	0.566306	0.601605	0.384152	0.418654	0.287946	0.0780568	6.19614e-05	0.00533911	0.282989
0.40415	0.335762	0.660969	0.499978	0.416559	0.0910247	0.608329	3.26743e-05	0.328757	0.339491	0.985686	0.0811133	0.373209	0.323985	0.630192	0.0219549	0.343545	0.159631
0.916002	0.234717	0.453933	0.408484	0.937282	0.299312	0.305014	0.0410923	0.987523	0.411662	0.585817	0.0564221	0.478933	0.269104	0.70659	0.320747	0.394803	0.189873
0.383966	0.140064	0.516605	0.300941	0.751086	0.0677259	0.761678	0.00458675	0.794675	0.0104523	0.436115	0.129958	0.36968	0.433497	0.153719	0.0518081	0.285014	0.36265
0.504243	0.392071	0.772922	0.0886942	0.637672	0.00304901	0.999387	6.20014e-07	0.419637	0.241574	0.615296	0.163528	0.53142	0.39285	0.995619	0.219906	0.425475	0.221325
0.405644	0.169189	0.477889	0.256652	0.624133	0.0231919	0.989456	0.000116975	0.467876	0.000265625	0.150044	0.0281563	0.459939	0.153618	0.0392778	0.0713608	0.299153	0.30443
0.491496	0.940616	0.677764	0.236314	0.900577	0.139369	0.999363	0.00624308	0.556475	0.262645	0.00154039	0.0249321	0.495003	0.381161	0.0300014	0.0441725	0.380672	0.333844
0.483629	0.0701121	0.69859	0.413993	0.582533	0.198343	0.996986	4.5438e-07	0.278055	0.0168921	0.65252	0.000844913	0.410991	0.146474	0.558382	0.154451	0.132197	0.367033
0.50267	0.444292	0.525329	0.372887	0.887644	0.000336869	0.344214	0.00108494	0.459659	0.346211	0.264204	0.319701	0.28207	0.39763	0.297415	0.091459	0.263761	0.303243
0.604594	0.14142	0.360167	0.479614	0.732602	0.385154	0.640477	0.994811	0.719764	0.173224	0.28513	0.00646596	0.406294	0.416077	0.234479	0.0076923	0.173653	0.296883
0.468132	0.0183931	0.751937	0.300098	0.401454	0.215549	0.995245	0.000857078	0.517845	0.285713	0.364829	0.0100128	0.308255	0.304757	0.838114	9.07105e-05	0.278795	0.197031
0.573457	0.031415	0.550011	0.28066	0.164525	0.236838	0.974008	0.593578	0.496955	0.0856151	0.220346	0.0877296	0.583696	0.265605	0.87346	0.199489	0.362431	0.403713
0.511423	0.26824	0.451812	0.346739	0.357287	0.0555461	0.999103	0.0810262	0.537682	0.00214275	0.000387306	0.41696	0.526756	0.360363	0.984302	0.036324	0.616732	0.145284
0.536972	0.309106	0.745753	0.131596	0.704889	0.294415	0.373501	0.198607	0.664248	0.402526	7.99258e-05	0.00972595	0.481591	0.127734	0.701733	5.99415e-05	0.314361	0.16447
0.584363	0.0604138	0.463764	0.465318	0.246252	0.0184478	0.556672	8.16062e-06	0.693704	0.268865	0.297141	0.357906	0.447721	0.262061	0.994615	0.0161811	0.251699	0.17341
0.376743	0.0359492	0.841053	0.227329	0.41803	0.0154221	0.109186	3.18251e-07	0.495001	0.352861	0.0313289	0.458336	0.486675	0.463243	0.0144313	0.0206788	0.0430279	0.327106
0.536495	0.0571749	0.460798	0.210087	0.680282	0.116033	0.990306	0.00021951	0.434742	0.41387	0.00461228	3.93588e-10	0.683127	0.372343	0.26394	0.757185	0.349945	0.362641
0.505764	0.354327	0.471965	0.224236	0.598777	0.10347	0.965989	0.0326724	0.455793	0.344775	0.000440873	0.603961	0.434054	0.0999407	0.0724437	0.186021	0.332008	0.392646
0.238928	0.421491	0.511896	0.199723	0.802971	0.152859	0.000216972	0.0861306	0.401135	0.357173	0.0140573	0.846041	0.761348	0.311117	0.333708	0.041942	0.194408	0.178943
0.372812	0.421734	0.505763	0.332286	0.442367	0.097367	0.469583	0.372488	0.729893	0.445895	0.937661	0.347459	0.597053	0.402926	0.272076	0.00229263	0.0905416	0.287287
0.526113	0.370791	0.659125	0.192272	0.259079	0.0586655	0.753833	1.35438e-09	0.472472	0.222814	0.123916	0.000942913	0.511448	0.39322	0.628854	0.0304255	0.289928	0.295309
0.776604	0.139116	0.551593	0.394119	0.432288	0.00619529	0.989496	0.499469	0.614096	0.158929	0.281455	0.309365	0.460262	0.479834	0.443526	0.231442	0.208087	0.361523
0.362925	0.243781	0.437951	0.212032	0.832235	0.0144592	0.950946	1.39375e-05	0.538443	0.256733	0.0664492	0.171963	0.630763	0.49535	0.392875	0.00357478	0.0761618	0.252578
0.579948	0.422888	0.539806	0.33895	0.231572	0.133217	0.994414	4.89155e-07	0.615955	0.401808	0.988896	0.320807	0.295496	0.360199	0.608824	0.13717	0.0623168	0.0640456
0.419233	0.114886	0.312788	0.513977	0.396833	0.0648558	0.833922	0.97161	0.456007	0.0569176	0.374055	0.0105478	0.384198	0.274212	0.00916901	0.13836	0.320087	0.0637744
0.922745	0.138637	0.298618	0.396816	0.713258	0.0439347	0.156603	0.000644645	0.378465	0.225607	0.899343	1.75904e-05	0.419847	0.390542	0.0308112	0.00707438	0.428603	0.218573
0.344174	0.509416	0.916449	0.0359962	0.674265	0.393726	0.128987	0.0144181	0.329936	0.399254	0.028966	0.000233812	0.506298	0.459284	0.999982	0.167249	0.314072	0.369198
0.458617	0.104363	0.582676	0.248229	0.763355	0.0436432	0.999671	0.000124539	0.6646	0.0877983	0.196521	0.00198823	0.598846	0.421042	0.148524	0.0741716	0.364411	0.0211487
0.306314	0.00243599	0.641319	0.188764	0.447697	0.0261769	0.00140877	0.00136947	0.415414	0.347042	1	0.333298	0.437154	0.314298	0.480682	0.0565837	0.15289	0.580717
0.782474	0.23404	0.519114	0.222635	0.355624	0.0390059	0.0091343	0.0884426	0.61803	0.340649	0.0270758	0.312971	0.454027	0.399313	0.524092	0.00515677	0.383885	0.356613
0.576618	0.0254642	0.674736	0.309336	0.504701	0.0024744	0.88873	0.277604	0.330974	0.398613	0.560159	0.0126886	0.439739	0.444575	0.0794172	0.122281	0.0611444	0.20582
0.226934	0.196154	0.461585	0.204335	0.421928	0.0575742	0.0199894	0.000153795	0.467274	0.244698	0.92966	0.416452	0.598059	0.367476	0.766287	0.127249	0.117439	0.296158
0.319921	0.11491	0.428765	0.298735	0.31758	0.224367	0.00194276	0.729948	0.830028	0.312494	0.00459803	0.103198	0.490118	0.365579	0.990974	0.0236065	0.469609	0.252422
0.0183328	0.326212	0.531188	0.333974	0.514444	0.197934	0.70429	0.0587079	0.470366	0.434012	0.31597	0.128694	0.320946	0.138571	0.790073	0.0854836	0.208583	0.249464
0.620899	0.236368	0.431763	0.295072	0.31124	0.0418304	0.186945	0.11465	0.530503	0.329783	0.175099	0.0558179	0.569631	0.456111	0.715413	0.00510261	0.0863298	0.179685
0.0989626	0.0784012	0.494712	0.24836	0.858575	0.225277	0.998209	0.793453	0.616345	0.343043	0.737494	0.00260761	0.453414	0.403036	0.0792268	2.85059e-05	0.332158	0.365798
0.391302	0.228781	0.495041	0.245077	0.529702	0.204898	0.998358	0.00305758	0.682279	0.263095	0.467103	0.0382672	0.47333	0.290613	0.269944	0.101315	0.190962	0.499573
0.547316	0.267002	0.558048	0.249235	0.492648	0.00640096	1.82553e-08	0.667118	0.463438	0.463326	0.928154	0.0124135	0.665653	0.469723	0.546485	0.15983	0.328354	0.0761464
0.817545	0.59588	0.508539	0.0415419	0.796469	0.0201236	0.0486686	0.889089	0.618747	0.404667	0.745277	0.134139	0.525907	0.317014	0.69532	0.103241	0.19215	0.245448
0.727702	0.167321	0.610828	0.402313	0.810639	0.213916	0.00412254	0.000138103	0.781006	0.253166	0.000948621	0.0414333	0.504273	0.36649	0.222198	0.350949	0.0843636	0.240694
0.622449	0.290857	0.66695	0.321589	0.206788	0.0105354	0.99192	4.45269e-06	0.534229	0.424692	0.384507	0.0487987	0.469962	0.369299	0.236884	0.0148133	0.368801	0.143134
0.341791	0.0350199	0.852233	0.0369444	0.171529	0.00182792	0.980083	0.0487238	0.570847	0.235578	0.00480085	0.0686702	0.59068	0.380297	0.718403	0.0889631	0.515024	0.24675
0.483702	0.257952	0.380049	0.10016	0.293104	0.15285	0.651067	3.42935e-09	0.464655	0.423652	0.516485	0.320183	0.463177	0.342564	0.544352	0.0914927	0.128638	0.431808
0.360641	0.298236	0.382299	0.178833	0.570138	0.0397165	0.118953	0.953558	0.466961	0.403578	0.0396905	0.210144	0.555874	0.236008	0.974696	0.695132	0.176441	0.0463463
0.599268	0.354414	0.436618	0.0156056	0.71458	0.0440995	0.98516	1.21532e-06	0.64128	0.24853	0.77096	0.330334	0.599426	0.399568	0.175182	0.0454971	0.683789	0.289912
0.269159	0.176542	0.182428	0.0539712	0.702087	0.0625189	0.947162	0.35712	0.740087	0.389805	0.375691	0.00428869	0.570027	0.239636	0.596509	0.212677	0.0114776	0.342888
0.353569	0.258723	0.855869	0.167828	0.464725	0.00833228	0.999994	8.51214e-05	0.452189	0.313493	0.3948	0.360047	0.513092	0.121067	0.391434	0.099871	0.457799	0.241093
0.462296	0.192699	0.461411	0.298912	0.937919	0.002202	0.0689554	3.19395e-06	0.784471	0.149313	0.62066	0.0741311	0.331469	0.327838	0.330241	0.386121	0.444163	0.210953
0.355843	0.396831	0.345342	0.445415	0.922047	0.363614	0.0010773	0.465537	0.464863	0.23615	0.559214	0.158063	0.513659	0.227993	0.01338	0.17834	0.0533404	0.423726
0.398617	0.0833952	0.319357	0.0517242	0.789529	0.235871	3.14321e-05	1.35253e-06	0.506417	0.195619	0.513199	0.36769	0.608634	0.207303	0.460925	0.282046	0.0270639	0.241886
0.472076	0.0892156	0.565499	0.341564	0.794836	0.312669	0.982466	0.0690419	0.409732	0.528493	0.160738	0.00204702	0.505016	0.349199	0.938555	7.21584e-05	0.565637	0.230019
0.821293	0.109661	0.633934	0.20667	0.753122	0.0595189	0.000839378	3.06499e-05	0.51605	0.218725	0.966459	0.417051	0.215743	0.472667	0.0822243	0.056077	0.204555	0.283997
0.0100532	0.169159	0.468044	0.170139	0.276231	0.0918155	0.854959	0.000922004	0.481262	0.43708	0.00054898	0.56066	0.480009	0.287503	0.0768934	0.0688569	0.0955043	0.677335
0.408989	0.273462	0.390164	0.428398	0.61787	0.347427	0.00104638	1.03412e-05	0.462894	0.00238323	0.0304872	0.431191	0.367669	0.501636	0.162081	0.0691029	0.710392	0.0923524
0.47934	0.0215589	0.482241	0.135861	0.439525	0.130798	0.999997	2.72549e-06	0.676416	0.562525	0.189608	0.00760248	0.306319	0.302334	0.700526	0.0123015	0.207717	0.230522
0.613186	0.165769	0.250188	0.221487	0.474836	0.250822	0.0660128	6.16947e-05	0.406505	0.388323	0.595128	0.00227753	0.665385	0.236909	0.700794	0.0677352	0.111159	0.122916
0.430487	0.309617	0.888055	0.48339	0.895074	0.000128105	2.43478e-05	0.385098	0.679821	0.382205	0.653788	0.0108812	0.461847	0.500342	0.0765854	0.16909	0.274369	0.184808
0.401961	0.173181	0.435875	0.0622288	0.241269	0.124753	0.0562732	0.507513	0.674152	0.00086035	0.270099	0.248806	0.161501	0.304113	0.103516	0.00480928	0.302586	0.304136
0.388252	0.145577	0.516572	0.104489	0.772875	0.0629805	0.90185	0.974393	0.396289	0.59849	0.428616	0.0633647	0.473536	0.459316	0.513493	0.0275871	0.303766	0.0744835
0.321882	0.258076	0.603429	0.402428	0.343391	0.432558	0.893116	0.000960481	0.628583	0.598045	0.0227811	0.0437747	0.430864	0.36754	0.0111213	0.00663801	0.325936	0.319983
0.358506	0.0999099	0.465907	0.43541	0.827081	0.0911713	0.98449	0.123292	0.370823	0.250864	0.215654	0.00887584	0.695895	0.320214	0.19819	0.110977	0.440366	0.197439
0.596744	0.0558989	0.450393	0.145131	0.490922	0.0442621	0.390728	0.93047	0.941641	0.37902	0.116957	9.1828e-07	0.496679	0.280881	0.464252	0.127445	0.0813573	0.257562
0.328876	0.0273233	0.655035	0.448382	0.406614	7.76108e-05	0.00030598	4.94182e-05	0.434371	0.082397	0.129432	0.21412	0.583438	0.258957	0.848209	0.111214	0.262354	0.224445
0.503131	0.40542	0.654896	0.229869	0.462588	0.201554	0.510138	5.0386e-05	0.611922	0.177136	0.0104336	0.0229965	0.447434	0.455464	0.0576141	0.0584152	0.183573	0.395495
0.412064	0.28658	0.194505	0.291305	0.510057	0.028525	0.99994	0.0158455	0.487057	0.534329	0.00221941	0.0129701	0.384045	0.441298	0.103524	0.39759	0.220706	0.282622
0.600991	0.259021	0.368254	0.308764	0.943436	0.145108	0.719331	1.6371e-06	0.984828	0.455847	0.163438	0.000446983	0.392545	0.162031	0.516703	0.349464	0.527833	0.0845343
0.610989	0.309476	0.586704	0.200846	0.464089	0.151638	4.02929e-05	0.000167704	0.510214	0.140818	0.347983	0.00154689	0.519926	0.280897	0.223613	0.250741	0.350516	0.260051
0.196539	0.222708	0.385575	0.397492	0.307127	0.00286404	1.01909e-08	0.000483525	0.848761	0.290471	0.177179	4.98385e-06	0.604053	0.121853	0.0327834	0.18681	0.598935	0.363891
0.600749	0.0164295	0.481477	0.138746	0.498692	0.0209028	0.115243	9.24948e-06	0.408657	0.0351672	0.467123	1.39091e-05	0.471789	0.481577	0.5791	8.1728e-06	0.216881	0.329221
0.419701	0.0138426	0.76489	0.053388	0.451425	0.473749	7.19317e-06	0.139707	0.996931	0.686018	0.0152454	0.00104484	0.612689	0.501554	0.804992	0.017463	0.724513	0.165211
0.421662	0.325815	0.577806	0.0234283	0.576248	0.109709	0.9924	7.10003e-05	0.109343	0.367	0.19768	0.330881	0.479662	0.303253	0.926733	0.0192489	0.380336	0.216316
0.311665	0.182521	0.721046	0.267124	0.628399	0.0256207	0.818212	0.3034	0.543027	0.357464	0.0151872	8.4173e-07	0.227821	0.356299	0.0439586	0.128515	0.0660949	0.3458
0.342108	0.353325	0.397142	0.432494	0.69207	0.240801	0.000422663	0.926348	0.591614	0.415314	0.473931	0.519399	0.613719	0.222167	0.249772	0.191884	0.259615	0.0634858
0.351542	0.240698	0.526543	0.360758	0.371767	0.440852	0.118305	5.41489e-07	0.412902	0.401978	0.515552	0.00992384	0.355949	0.448396	0.627104	3.23921e-05	0.107786	0.378454
0.357274	0.31753	0.469804	0.38255	0.18423	7.86257e-05	0.995764	5.58063e-06	0.487083	0.291239	0.72373	1.44876e-07	0.272017	0.767295	0.222246	0.0789757	0.581041	0.473719
0.405589	0.137731	0.455331	0.350387	0.565343	0.0949861	0.904597	0.00024281	0.427024	0.00222778	0.659013	0.0108536	0.359605	0.297567	0.980555	0.253212	0.354005	0.0851244
0.322376	0.0761027	0.201765	0.328357	0.0888628	0.0924089	0.995865	0.00413357	0.620643	0.00146602	0.808715	0.0480014	0.298545	0.469453	0.459268	0.0268849	0.164422	0.285694
0.26585	0.28103	0.788831	0.30964	0.403394	0.0266411	0.996137	0.000634056	0.365609	0.347507	0.0183963	0.0487349	0.549981	0.220105	0.771446	0.000106582	0.354579	0.227054
0.874386	0.18568	0.325422	0.415419	0.466539	0.0207424	0.997166	0.0101487	0.200808	0.509895	0.0432159	0.426614	0.429501	0.332217	0.0263835	3.39751e-06	0.302832	0.321542
0.479302	0.00148335	0.689337	0.266973	0.417161	0.00845193	0.993872	0.000646022	0.302677	0.293664	0.702539	0.057093	0.539494	0.319739	0.756123	0.00603624	0.435387	0.464721
0.560915	0.217167	0.825652	0.295072	0.671134	0.15633	0.657904	8.21717e-05	0.51484	0.180093	0.299855	0.366304	0.739481	0.237326	0.182158	0.11614	0.0612652	0.115902
0.626887	0.637917	0.701299	0.188293	0.750402	0.177271	4.8961e-05	0.884294	0.814075	0.326385	0.702539	0.248285	0.646113	0.429054	0.513427	0.00208621	0.526049	0.234871
0.682526	0.240624	0.558768	0.425826	0.605468	0.163207	0.935295	0.419534	0.438156	0.409633	0.207615	0.475419	0.413075	0.378386	0.949321	0.000291069	0.313189	0.493834
0.161802	0.110923	0.429682	0.225691	0.549389	0.0275393	0.0918273	0.0193134	0.370541	0.376315	0.947314	0.202904	0.492489	0.345575	0.457591	0.00594042	0.0941716	0.112761
0.344552	0.457051	0.394304	0.0217271	0.533964	0.0661744	0.997437	0.000573523	0.539505	0.350135	0.606368	0.228322	0.33493	0.328659	0.0080725	0.106402	0.0742968	0.0997248
0.785553	0.21756	0.462324	0.263111	0.667903	0.12138	0.648267	0.000166391	0.465776	0.157927	0.000295208	0.20919	0.336319	0.208408	0.464252	0.0350264	0.0824444	0.258567
0.555216	0.428081	0.495932	0.303073	0.285738	0.0656814	0.0302328	0.0188406	0.9761	0.275183	0.419984	0.0882426	0.458429	0.454406	0.916099	0.0549831	0.189458	0.315438
0.305795	0.408297	0.748976	0.350387	0.832477	0.034122	0.16566	0.000144872	0.671876	0.40161	0.0267473	5.49118e-07	0.492278	0.546862	0.0144745	0.0605397	0.607143	0.353819
0.47505	0.268522	0.502668	0.40443	0.411503	0.0976294	0.00141337	0.437277	0.621162	0.514347	0.628468	0.145913	0.519604	0.229538	0.724331	0.0114045	0.39511	0.278988
0.267036	0.184255	0.357845	0.372566	0.460321	0.186153	0.505123	8.19538e-06	0.411214	0.262707	0.000671973	0.149903	0.33289	0.347842	0.99993	0.0456836	0.422311	0.427609
0.434985	0.330566	0.542838	0.204345	0.389296	0.044477	0.990584	4.00132e-07	0.457073	0.393328	0.369576	0.588222	0.455935	0.314207	0.203199	0.110915	0.29802	0.361369
0.44185	0.351961	0.59228	0.385551	0.639235	0.13796	0.869245	9.88262e-05	0.41577	0.432985	0.532973	0.141803	0.507746	0.336695	0.485195	0.134255	0.17094	0.509633
0.532701	0.272757	0.246445	0.265643	0.435697	0.0065954	0.817836	0.315701	0.485931	0.382522	0.0081957	0.321286	0.64781	0.267744	0.813425	0.00344489	0.44367	0.188832
0.968477	0.200043	0.427748	0.426958	0.702481	0.129896	0.434676	0.000373482	0.448125	0.291004	0.0669209	0.198207	0.539439	0.355813	0.124197	0.0462365	0.469235	0.38086
0.97043	0.389121	0.438626	0.360758	0.418946	0.0949051	0.99996	3.03851e-08	0.314476	0.322075	0.996994	0.00326293	0.502235	0.209713	0.490071	0.00917686	0.0422048	0.196676
0.729733	0.319184	0.787139	0.110856	0.579871	0.00431304	0.973294	0.00361818	0.658848	0.391364	0.040125	0.0603737	0.872568	0.327217	0.272553	0.0387697	0.164898	0.47425
0.336388	0.498197	0.507952	0.344015	0.38345	0.0349943	0.999831	0.163578	0.453986	0.0814398	0.00821076	7.16542e-07	0.484954	0.222274	0.245501	4.26752e-05	0.0622843	0.0654745
0.209156	0.00285406	0.499468	0.22708	0.443563	0.0519334	0.999823	3.56322e-07	0.401626	0.366876	0.0515535	0.474161	0.492855	0.312786	0.137338	0.256599	0.287534	0.398961
0.356118	0.0326271	0.770727	0.232812	0.614024	0.0809345	0.965118	4.78422e-05	0.372701	0.00887931	0.266881	0.0691035	0.470124	0.22275	0.694377	7.10809e-05	0.193172	0.277065
0.368118	0.48385	0.578967	0.475827	0.471769	0.00185145	0.999869	9.55802e-06	0.433654	0.475531	0.661505	0.295515	0.438054	0.357309	0.462063	0.0259295	0.278732	0.179521
0.324752	0.358973	0.437081	0.24836	0.423914	0.159851	0.818428	0.072678	0.445814	0.297973	0.0177833	0.221247	0.480456	0.253968	0.240407	0.0619211	0.305422	0.365025
0.852283	0.00109788	0.589344	0.437095	0.729376	0.107449	0.999836	8.40971e-10	0.540073	0.500882	0.925981	0.316492	0.716939	0.351055	0.293707	0.00151451	0.265203	0.281302
0.552543	0.378446	0.818431	0.0617552	0.412228	0.18812	0.999988	0.000155465	0.148251	0.381345	0.152799	0.0310691	0.495176	0.275731	0.45774	0.0298908	0.587831	0.383994
0.765883	0.0761929	0.38492	0.172884	0.578293	0.163297	0.0348171	0.000106052	0.539197	0.111279	0.0360815	0.012365	0.566735	0.379913	0.66071	0.125206	0.252993	0.155552
0.378196	0.0620044	0.626044	0.13127	0.375266	0.0400158	0.975593	0.996538	0.238626	0.376762	0.0389406	0.0496348	0.57389	0.242861	0.0514835	0.0413662	0.284133	0.412599
0.419228	0.239315	0.610193	0.332023	0.518599	0.0754241	0.780493	5.92727e-06	0.884016	0.311209	0.0556629	0.277117	0.620806	0.48009	0.238099	0.0524693	0.351073	0.392825
0.287522	0.438978	0.131927	0.360758	0.0857393	0.0700605	0.937824	0.0406137	0.425537	0.414335	0.451235	0.251449	0.298288	0.41247	0.865315	2.07606e-05	0.269866	0.137175
0.352166	0.186585	0.0342463	0.30562	0.46113	0.260154	0.105018	0.900581	0.500671	0.358578	0.012974	0.184414	0.520747	0.48925	0.500806	0.0997005	0.345904	0.477451
0.31797	0.0268434	0.604526	0.3322	0.945968	0.407613	0.983071	0.01119	0.943491	0.381507	0.583299	0.10347	0.57988	0.456817	0.0770969	0.408687	0.360863	0.139378
0.705918	0.279456	0.446398	0.016339	0.290127	0.119187	0.99684	0.0300624	0.490178	0.415349	0.979317	0.340147	0.498207	0.176908	0.869321	0.0205533	0.40677	0.363382
0.94275	0.156852	0.549062	0.176804	0.974972	0.121635	0.994714	5.21061e-06	0.386724	0.469116	0.904514	0.446695	0.69393	0.438874	0.580747	0.13763	0.413752	0.179281
0.33326	0.0308593	0.429626	0.381594	0.370583	0.18096	0.999563	2.95848e-07	0.357684	0.396949	0.266417	0.0327145	0.489997	0.262728	0.301522	0.0977598	0.234635	0.376988
0.430416	0.122665	0.52743	0.23002	0.393864	0.122546	0.000310209	2.76016e-06	0.380381	0.355686	0.000105845	0.42673	0.52199	0.262088	0.267455	6.6339e-05	0.146966	0.459648
0.637437	0.140659	0.51935	0.374935	0.631851	0.196579	0.999862	0.000180144	0.425729	0.400456	0.00278521	1.88409e-06	0.410231	0.114574	0.41871	0.455044	0.24466	0.16876
0.335202	0.472976	0.49484	0.330773	0.467358	0.056914	0.767494	0.765302	0.504496	0.406417	0.0174521	0.371913	0.368782	0.349826	0.613333	0.406744	0.125291	0.370977
0.337381	0.388514	0.593712	0.442296	0.99785	0.156253	0.889706	1.56236e-05	0.596017	0.339002	0.92248	0.0704887	0.402594	0.159649	0.93077	0.0123456	0.294023	0.418735
0.472537	0.157794	0.454842	0.445854	0.354401	0.0517308	0.00494506	7.28264e-05	0.465334	0.338452	0.211783	0.00435664	0.685678	0.225941	0.263098	5.96579e-05	0.209502	0.288194
0.662355	0.356352	0.353826	0.0181544	0.35566	0.0491126	0.45263	0.000389954	0.324375	0.616573	0.588195	0.121725	0.562528	0.544576	0.997259	0.0940392	0.350626	0.064197
0.327309	0.266567	0.563906	0.239753	0.489982	0.019613	0.000923655	0.00010717	0.431718	0.381841	0.569995	0.031628	0.301652	0.33145	0.281604	0.0550575	0.155682	0.394179
0.550847	0.313565	0.283658	0.32938	0.999085	0.0333992	0.999624	0.998378	0.310513	0.373773	0.0849409	0.000225404	0.664106	0.364906	0.360462	0.658204	0.108989	0.420676
0.409836	0.279107	0.64328	0.0311169	0.97939	0.060607	0.996275	0.0163927	0.548524	0.24741	0.503602	0.000753582	0.461506	0.691843	0.0986471	0.00655576	0.458243	0.375823
0.484455	0.225966	0.216825	0.404126	0.696969	0.109968	1.06322e-08	0.000274359	0.59529	0.0011143	0.00201805	0.0255952	0.523624	0.174952	0.149251	0.265433	0.301183	0.221097
0.556051	0.253697	0.370576	0.105258	0.666514	0.0589232	0.123949	0.995471	0.239023	0.451963	0.738795	0.442816	0.414926	0.305933	0.838319	1.30417e-05	0.56244	0.21425
0.859113	0.0579626	0.800164	0.119	0.220759	0.0565958	0.967166	1.31545e-07	0.352827	0.223163	0.65252	0.0101649	0.742232	0.398511	0.85376	0.201799	0.351947	0.255904
0.307204	0.0677143	0.643782	0.27624	0.610065	0.128236	0.968766	5.37346e-06	0.374495	0.0465576	0.00628132	0.200109	0.514098	0.487081	0.0622374	4.59448e-05	0.420188	0.111334
0.609173	0.0102478	0.502874	0.263159	0.831304	0.203881	0.482004	0.450356	0.467395	0.498827	0.342009	0.22345	0.530963	0.193084	0.738472	0.208881	0.13993	0.206461
0.324045	0.283728	0.563953	0.129934	0.680172	0.180892	0.000488173	0.0639074	0.511259	0.460138	0.00235661	0.00107121	0.317321	0.271357	0.0364647	0.107176	0.0440656	0.130677
0.389912	0.129088	0.471789	0.218788	0.206483	0.169536	0.940131	5.43886e-05	0.441557	0.331909	0.0439182	0.0233229	0.291174	0.152186	0.0721011	0.00593314	0.360541	0.138327
0.111851	0.259567	0.0516671	0.442193	0.451082	0.127815	0.828443	7.87148e-05	0.508088	0.0812762	0.0122487	0.233887	0.678889	0.383543	0.995028	0.0213057	0.336059	0.319763
0.457682	0.174341	0.897412	0.107003	0.463912	0.0253371	0.974332	5.0115e-06	0.625573	0.294322	0.912417	0.0174526	0.20175	0.412146	0.0820429	9.80721e-05	0.324342	0.22804
0.626596	0.487665	0.424452	0.416133	0.582801	0.00425927	1	0.702707	0.615044	0.249204	0.502704	0.0576381	0.778868	0.243755	0.76091	0.1083	0.729582	0.237784
0.359185	0.0602949	0.388018	0.294036	0.72844	0.158791	0.614972	0.000678823	0.946609	0.404259	0.551002	0.0284947	0.454545	0.476434	0.822281	0.282319	0.059488	0.0919801
0.425849	0.455047	0.272447	0.251735	0.482678	0.321085	0.236244	0.00365974	0.455844	0.425291	0.0205556	0.229474	0.796748	0.277532	0.114272	0.0433181	0.393575	0.35904
0.59914	0.0106379	0.522653	0.453089	0.883555	0.105113	0.000615246	0.000233116	0.428837	0.250791	0.579309	0.0155901	0.464612	0.136947	0.289674	0.399252	0.0861218	0.29297
0.406775	0.189648	0.531955	0.361497	0.218219	0.0604211	0.0803089	2.21203e-05	0.609596	0.351807	0.181534	0.0921804	0.0770016	0.305695	0.937199	0.0376505	0.345044	0.195962
0.571859	0.0618582	0.478574	0.109359	0.797309	2.82762e-05	0.000369799	3.72239e-05	0.516484	0.22427	0.00378402	0.092963	0.510288	0.274384	0.346532	0.0518311	0.0549523	0.288204
0.458196	0.156197	0.57684	0.103159	0.512753	0.0165712	0.451072	0.906711	0.259659	0.376946	0.682846	0.0851927	0.482406	0.322919	0.375844	0.0281987	0.477741	0.248502
0.83789	0.254267	0.798057	0.261735	0.440131	0.444871	0.43652	0.158882	0.433188	0.218669	0.316791	0.142542	0.527635	0.380754	0.0547657	0.00606554	0.416581	0.170027
0.830899	0.0202793	0.562105	0.259144	0.477582	0.000870263	0.0294651	0.0041513	0.531988	0.438042	0.440193	0.202284	0.605418	0.0918973	0.161791	3.97431e-05	0.352516	0.213546
0.431425	0.109501	0.673256	0.234279	0.876597	0.22198	0.272567	0.921811	0.429307	0.411015	0.396145	0.329863	0.455317	0.321172	0.812899	0.0180561	0.347805	0.362534
0.552041	0.00260967	0.64014	0.26568	0.493856	0.00736752	0.0247507	0.920303	0.424743	0.287867	0.0120768	1.32184e-06	0.666671	0.409481	0.158661	9.0936e-06	0.369661	0.197386
0.435954	0.202068	0.401578	0.0170025	0.359579	0.0338225	0.953088	0.000960481	0.787701	0.520631	0.678496	0.30817	0.574698	0.4286	0.99847	0.286308	0.355705	0.266175
0.250606	0.0177396	0.157499	0.204974	0.392113	0.0469232	0.980544	0.00776995	0.587733	0.47964	0.0198108	0.000333454	0.396332	0.171809	0.0330809	0.562202	0.508895	0.315111
0.359719	0.209082	0.426182	0.218618	0.456792	0.0703917	0.980963	4.7085e-05	0.193588	0.342134	0.00938175	0.00209042	0.635179	0.347935	0.228779	0.0183689	0.167475	0.241524
0.710522	0.0433798	0.517961	0.128319	0.258876	0.111605	0.130544	0.00169093	0.600378	0.233421	0.195152	0.0159932	0.463951	0.374483	0.775109	0.0228602	0.408135	0.48239
0.261255	0.235249	0.365752	0.337652	0.0585481	0.050804	0.00177408	9.16136e-08	0.480994	0.279072	0.189539	0.0130857	0.742416	0.364526	0.852092	0.150859	0.45158	0.53238
0.264668	0.0556207	0.706538	0.0527987	0.354296	0.00862808	0.999897	6.39065e-05	0.52033	0.355056	1	0.111449	0.34109	0.319063	0.647968	0.0929312	0.433777	0.254046
0.0995794	0.499007	0.493184	0.471216	0.813094	0.0602606	0.983288	0.000164476	0.620166	0.369481	0.920785	0.219535	0.572111	0.384195	0.872859	0.0394361	0.327787	0.166229
0.547921	0.459733	0.505327	0.34926	0.455524	0.248295	0.195908	0.000698283	0.214539	0.360257	1.96137e-05	0.283719	0.417618	0.277487	0.221633	0.117496	0.359225	0.323018
0.32675	0.111682	0.577741	0.391813	0.820644	0.000258293	1	0.600927	0.677128	0.0787367	0.563962	0.0281893	0.448424	0.450573	0.45282	0.0149663	0.518835	0.204738
0.298283	0.357333	0.344039	0.120336	0.632893	0.185434	0.000179296	0.612443	0.45738	0.211415	0.00455054	0.204907	0.692157	0.262537	0.957581	0.0339448	0.309713	0.341019
0.240555	0.184119	0.417763	0.224126	0.346224	0.0469963	0.000152424	0.00020899	0.329887	0.234398	0.122756	0.140266	0.477467	0.451784	0.831418	0.266151	0.357156	0.204738
0.404702	0.340068	0.275012	0.440569	0.0293943	0.0103763	0.636692	1.67741e-05	0.998812	0.278928	0.38554	0.000914804	0.221474	0.633446	0.999124	0.000370835	0.107701	0.123863
0.274314	0.210889	0.508034	0.0943889	0.845691	0.0198822	0.999953	0.0407994	0.515629	0.205094	0.0360815	0.00384802	0.513716	0.336176	0.943933	0.0826395	0.213804	0.231832
0.872885	0.186903	0.899168	0.0363636	0.366258	0.112694	0.000642591	0.00358522	0.91932	0.102018	0.307902	0.00860556	0.436739	0.435126	0.736208	0.105539	0.241969	0.274439
0.38227	0.23277	0.35096	0.332023	0.265771	0.0327929	0.421093	2.13191e-05	0.533054	0.292498	0.0174125	0.0843151	0.49912	0.27994	0.316183	0.000203097	0.0226614	0.114544
0.0671044	0.0173917	0.549591	0.050751	0.538116	0.042743	0.000396545	3.29963e-06	0.204243	0.345737	0.372179	0.0530584	0.489503	0.402276	0.0884786	0.032704	0.103309	0.380742
0.477147	0.276597	0.444809	0.281341	0.53413	0.0317172	0.989898	0.00265889	0.728708	0.266421	0.00349939	0.0308325	0.514805	0.2439	0.429875	0.0857014	0.250138	0.39851
0.503685	0.534792	0.52474	0.43486	0.751114	0.113631	1	0.00185527	0.62707	0.279311	0.00802645	0.0656765	0.409398	0.445738	0.96607	0.0243717	0.411478	0.260336
0.652467	0.409364	0.42124	0.286424	0.612303	0.0840847	0.42509	6.54471e-05	0.453384	0.608617	4.90527e-05	0.0453993	0.391	0.277115	0.015859	6.45233e-05	0.167427	0.37592
0.448456	0.396819	0.513916	0.365861	0.418892	0.0357352	0.547494	9.85238e-06	0.458751	0.192132	0.01811	0.416774	0.494435	0.288636	0.173459	0.138227	0.409154	0.214794
0.432875	0.256987	0.867681	0.218472	0.83375	0.080344	0.962979	0.00186771	0.494962	0.44427	0.829573	0.309671	0.545459	0.2077	0.271811	0.150456	0.299231	0.367925
0.668743	0.0751364	0.366877	0.350834	0.447713	0.452404	0.000130391	0.000355258	0.371187	0.256935	0.301816	0.181567	0.547658	0.320864	0.0187399	0.235626	0.176244	0.387378
0.59142	0.0163746	0.4671	0.366013	0.340451	0.153246	0.0439174	0.628611	0.377509	0.00454204	0.126332	0.00469325	0.785597	0.052737	0.818695	0.277482	0.163095	0.214683
0.376566	0.146798	0.517475	0.0489405	0.514465	0.20356	1.30443e-08	1.16758e-06	0.160583	0.483641	0.404893	0.0689883	0.583247	0.305375	0.14722	0.325055	0.889687	0.363975
0.75367	0.26008	0.196189	0.0848442	0.835446	0.0063966	0.308638	0.000527368	0.389268	0.111993	0.6482	0.0457366	0.454763	0.191417	0.0490494	0.0327708	0.473902	0.302982
0.608879	0.0916091	0.455808	0.263925	0.545911	0.128886	0.753573	2.02085e-06	0.14299	0.136581	0.376335	0.0760613	0.572634	0.418563	0.114738	0.188282	0.392619	0.269309
0.476835	0.0985394	0.0132521	0.410495	0.306115	0.0400347	0.016326	2.54734e-07	0.713165	0.436312	0.0831994	0.277925	0.44072	0.374391	0.224289	0.000406197	0.0434733	0.108125
0.774385	0.589682	0.763612	0.344015	0.448108	0.0271828	0.665266	0.382032	0.386801	0.361468	3.3329e-06	0.226222	0.420051	0.288506	0.0705618	0.221089	0.309977	0.136623
0.718243	0.00427479	0.680642	0.601929	0.450506	0.243438	0.417994	0.001043	0.161481	0.449485	0.574654	0.00307405	0.327384	0.159024	0.16143	0.00123514	0.234701	0.270865
0.460709	0.319103	0.399692	0.46634	0.891171	0.057991	0.912706	8.05326e-06	0.177356	0.366962	0.739712	0.00769416	0.247335	0.438796	0.0833829	0.123009	0.654626	0.149055
0.353695	0.0132525	0.551593	0.203393	0.514932	0.188333	0.00100919	1.0586e-05	0.333423	0.399644	0.536589	0.283299	0.481724	0.372213	0.252686	0.283285	0.209511	0.41576
0.86253	0.212457	0.623725	0.35356	0.644426	0.135348	0.984892	6.87647e-07	0.833541	0.332453	0.554344	0.407004	0.576795	0.445016	0.211439	4.13539e-05	0.249866	0.212628
0.840409	0.392449	0.791482	0.167983	0.784385	0.000162251	0.0566171	8.50683e-06	0.689334	0.715778	0.455664	0.275732	0.189942	0.373465	0.999932	0.0140415	0.420027	0.598402
0.222875	0.157808	0.565362	0.415419	0.403385	0.000500656	0.986231	0.00175633	0.166675	0.465484	0.33901	0.00759206	0.535557	0.38644	0.383503	0.273878	0.348626	0.218675
0.394731	0.205715	0.432586	0.399223	0.527155	0.0226757	0.999523	0.0515067	0.391464	0.357003	0.306537	7.57879e-05	0.449243	0.387005	0.0895979	0.000100681	0.321677	0.426883
0.421638	0.0146568	0.669967	0.0463086	0.443553	0.164011	2.02138e-05	0.00524831	0.12467	0.383284	0.4678	0.287669	0.732743	0.57032	0.0504787	0.029546	0.086791	0.290581
0.388366	0.212324	0.592768	0.491703	0.908573	0.0405116	0.000205295	0.0907164	0.42259	0.514975	0.593466	0.000894239	0.579953	0.315019	0.0371463	0.270939	0.297141	0.41898
0.452119	0.698801	0.325335	0.0874482	0.676307	0.0306652	0.897991	7.55273e-06	0.296157	0.472746	0.504918	0.000354238	0.901533	0.387897	0.985302	0.237854	0.157895	0.237538
0.290091	0.236019	0.516076	0.00980338	0.737831	0.3694	0.999927	0.00140246	0.111077	0.0654863	0.264694	0.492655	0.543708	0.214458	0.32236	0.0823552	0.269665	0.205136
0.398672	0.339012	0.28391	0.166854	0.496134	0.0580002	0.375324	0.0271029	0.44002	0.58513	0.355577	0.0955387	0.67387	0.417641	0.625614	0.183715	0.106031	0.240246
0.314102	0.137889	0.684674	0.379276	0.478788	0.00267044	0.0859711	3.7965e-06	0.508848	0.146855	0.549084	0.0216649	0.516918	0.140013	0.36498	0.000176773	0.345236	0.386683
0.919294	0.105824	0.567919	0.445854	0.438488	0.17865	0.999964	0.000185261	0.464672	0.453859	0.0171295	0.371466	0.58097	0.248577	0.95794	0.308522	0.42948	0.475247
0.670919	0.000480387	0.599991	0.422661	0.584533	0.052648	0.247508	0.0554329	0.451923	0.368099	0.365053	0.332049	0.586476	0.451447	0.0147224	0.0611092	0.350011	0.360126
0.525052	0.163157	0.102784	0.358418	0.525858	0.074259	0.0267385	4.5788e-05	0.496532	0.112411	0.0300949	0.580046	0.404753	0.561425	0.416599	0.270148	0.31334	0.318195
0.408495	0.00442433	0.630499	0.28627	0.665454	0.15928	0.899788	0.000841818	0.466807	0.0162755	0.217755	0.204793	0.481876	0.635874	0.840957	0.0363327	0.173289	0.328784
0.473866	0.304376	0.663983	0.491953	0.804289	0.214249	0.0598618	6.12503e-08	0.991975	0.61917	0.60229	0.307977	0.395545	0.411342	0.379974	0.000163103	0.340051	0.364483
0.750288	0.307115	0.556907	0.0503372	0.451405	0.0101021	0.920793	0.992055	0.859105	0.32762	0.243406	0.478197	0.394602	0.120467	0.361648	0.0111052	0.580745	0.0741508
0.311822	0.418998	0.48223	0.180338	0.585911	0.124637	0.999838	2.74408e-05	0.441649	0.500516	0.533629	5.25019e-08	0.53614	0.35457	0.410798	0.119447	0.394777	0.140338
0.465083	0.499738	0.597154	0.281257	0.228233	0.321592	0.979717	0.00574932	0.564273	0.217096	0.00121281	0.0351198	0.582437	0.426993	0.867488	0.113964	0.235891	0.195233
0.452598	0.0454785	0.716563	0.292864	0.381957	0.0991934	0.000445917	0.00639558	0.589031	0.277951	0.341508	0.00115101	0.500131	0.0519962	0.0653074	0.0711609	0.274868	0.260605
0.818934	0.161406	0.300157	0.364334	0.2628	0.105274	0.999289	0.00382765	0.571247	0.270656	0.994875	0.000463299	0.51786	0.324883	0.130422	0.0544516	0.378281	0.577806
0.381436	0.249956		0.183239	0.686587	0.251739	0.005769	5.63961e-05	0.373391	0.372742	0.986219	0.102589	0.581506	0.177657	0.998138	0.111004	0.797505	0.55168
0.299184	0.268001		0.318582	0.790648	0.446797	0.999048	3.9542e-05	0.559332	0.309168	0.00945468	0.351156	0.700749	0.375308	0.568773	0.232569	0.0882967	0.151317
0.576717	0.227087		0.331736	0.730811	0.307134	0.70172	0.777736	0.912663	0.293719	0.656099	0.0477272	0.35541	0.185986	0.634261	0.0513492	0.214168	0.267817
0.80535	0.0214953		0.527456	0.304686	0.131509	0.00321292	0.00742102	0.461798	0.348064	0.161664	0.435336	0.428294	0.412278	0.997632	0.145601	0.385009	0.2862
0.722353	0.249452		0.318432	0.277813	0.320646	0.778759	0.63876	0.428857	0.550727	0.0139068	0.155907	0.497128	0.330236	0.406443	0.000250792	0.441183	0.313824
0.271523	0.290615		0.0457389	0.697645	0.269024	0.000462587	0.00750161	0.499459	0.000956241	0.618217	0.00619958	0.598285	0.448949	0.10736	0.119442	0.707527	0.0822534
0.480923	0.187942		0.391455	0.434235	0.190396	9.80979e-07	4.52365e-05	0.512568	0.422793	0.641738	0.122478	0.444746	0.266323	0.829938	0.263446	0.1577	0.334067
0.85645	0.97014		0.328638	0.292257	0.000147368	0.000209479	0.000533109	0.549085	0.459554	0.591531	5.0047e-06	0.463905	0.493975	0.208887	0.0389345	0.15947	0.182999
0.515969	0.0270751		0.0884146	0.398559	0.0597872	0.000292621	0.0100163	0.418377	0.00146036	0.32672	0.0738595	0.484295	0.270532	0.211546	0.298097	0.141124	0.155104
0.391665	0.653927		0.193279	0.061679	0.0271581	0.756579	0.00298365	0.838361	0.291065	0.279844	3.05127e-10	0.446312	0.394041	0.0615806	0.0896459	0.160476	0.274317
0.444025	0.0457065		0.635453	0.504075	0.158851	0.997787	0	0.464079	0.400484	0.0220734	0.350979	0.502327	0.294073	0.0662185	0.0129591	0.192894	0.328812
0.533407	0.157085		0.332496	0.900598	0.145551	0.999957	0.000901151	0.44535	0.462146	0.455608	0.0656246	0.493686	0.489644	0.545614	0.00241851	0.0844509	0.101411
0.370733	0.249069		0.187797	0.36847	0.290273	3.49137e-05	0.00216657	0.384061	0.205277	1	0.392749	0.66768	0.149798	0.420895	0.131555	0.550709	0.197235
0.365393	0.346651		0.0185607	0.33044	0.0978856	0.984526	0.00268003	0.213084	0.227621	0.541915	0.175664	0.300109	0.448939	0.939656	0.00293727	0.375275	0.246356
0.209491	0.31916		0.260769	0.348948	0.0932644	0.655452	0.00951922	0.342587	0.485366	0.0598679	0.0905911	0.466146	0.288887	0.954459	0.0571643	0.483695	0.378168
0.341428	0.115175		0.138408	0.205122	0.0922837	0.000215143	0.972567	0.406334	0.348594	0.797876	0.00159074	0.591134	0.183581	0.781387	0.0100923	0.356847	0.328084
0.286751	0.000934931		0.0196836	0.735645	0.0886452	0.0131932	0.0938485	0.399843	0.186694	0.40482	0.251245	0.762949	0.310894	0.207186	0.213265	0.170037	0.118628
0.476407	0.00258684		0.104617	0.528399	0.0492889	0.940438	0.0956895	0.685691	0.245685	0.112853	0.368971	0.261082	0.345467	0.986464	0.181431	0.143149	0.253793
0.315783	0.192397		0.250021	0.522265	0.0829411	0.283468	0.00698155	0.579363	0.415796	0.487287	0.00260834	0.523429	0.122867	0.401919	0.112513	0.024458	0.273353
0.465588	0.077647		0.221487	0.703452	0.128767	1	0.838775	0.352661	0.0984076	0.433368	0.000159482	0.482423	0.266049	0.27807	0.00337493	0.309126	0.214198
0.303015	0.33301		0.0298705	0.300438	0.00795453	0.575223	0.0655796	0.49477	0.411042	0.101451	0.283487	0.401124	0.425867	0.993886	0.0117382	0.797641	0.259036
0.347493	0.181981		0.415875	0.77641	0.244169	0.756689	3.03644e-05	0.732374	0.367543	0.994791	1.30872e-05	0.26508	0.191246	0.921776	0.112197	0.567373	0.228441
0.549743	0.190308		0.318097	0.273517	0.0987678	0.780353	0.00062864	0.163281	0.353821	0.504339	0.00896158	0.453704	0.448677	0.324864	0.102724	0.333026	0.364478
0.403205	0.223101		0.327012	0.420224	0.000779586	0.99993	0.887864	0.739128	0.224882	0.55782	0.00804631	0.208513	0.413058	0.62051	0.0069815	0.146357	0.0717093
0.347301	0.201853		0.433257	0.281586	0.0396421	0.0515052	0.994453	0.845224	0.266773	0.00250664	0.0405422	0.0960685	0.421405	0.271861	0.0510223	0.257966	0.293887
0.277518	0.0122115		0.344015	0.928443	0.235093	0.954217	3.5235e-06	0.424209	0.211792	0.106373	0.00146626	0.49676	0.0999409	0.50227	0.0631039	0.146399	0.253616
0.537162	0.223708		0.0573099	0.0300658	0.000976969	0.988284	0.00745701	0.816449	0.0607215	0.311676	0.420037	0.677454	0.416293	0.0165135	0.00450941	0.30526	0.316143
0.205433	0.204881		0.282885	0.365253	0.0293644	0.000646064	0.00741478	0.997344	0.391833	0.0154253	0.00946383	0.528334	0.347231	0.618287	0.0170257	0.397025	0.449972
0.528017	0.0809113		0.162543	0.256	0.0152974	4.67964e-06	0.00174432	0.135212	0.0003829	0.774994	0.0571864	0.448136	0.327416	0.902158	0.26595	0.153712	0.353144
0.535931	0.175123		0.453174	0.390434	0.204751	0.131865	0.28293	0.120014	0.532497	0.0011245	0.0418284	0.469345	0.34387	0.0868215	0.410044	0.234633	0.298568
0.158849	0.349313		0.325106	0.740303	0.136192	0.997682	0.108946	0.439486	0.439307	0.0943794	0.138775	0.27574	0.463015	0.106036	0.104989	0.105048	0.0505388
0.141865	0.17361		0.54878	0.499986	0.06864	0.00212115	0.00150741	0.193079	0.462411	0.157358	0.420725	0.700373	0.112811	0.899349	0.00255134	0.415081	0.239683
0.729569	0.000574848		0.0457501	0.424538	0.0401163	0.857379	0.449407	0.765186	0.4231	0.980824	0.0720354	0.776748	0.248549	0.995788	4.47409e-06	0.36757	0.535261
0.47998	0.278995		0.298112	0.378413	0.0269304	0.00841235	0.00253772	0.548281	0.0229904	0.823261	0.0235837	0.439423	0.320843	0.0832302	0.168937	0.258557	0.226229
0.451968	0.00665346		0.0721469	0.550897	0.194884	3.29266e-06	0.000226523	0.447374	0.368442	0.193495	0.353896	0.4791	0.333529	0.762679	0.000142584	0.40796	0.259478
0.405352	0.234849		0.023104	0.25153	0.0754732	0.542181	0.492576	0.604709	0.244386	0.179115	0.223169	0.537969	0.328643	0.166969	0.00184412	0.18923	0.213191
0.576374	0.168391		0.367101	0.165499	0.000943195	0.7397	0.00108889	0.395847	0.419651	0.363584	0.381408	0.564964	0.476513	0.00384626	0.0880839	0.136121	0.351727
0.52237	0.250957		0.151222	0.156674	0.0547072	0.218569	0.797316	0.456922	0.128667	5.70594e-07	0.115185	0.684079	0.296181	0.109723	1.95774e-06	0.400529	0.148863
0.882833	0.15982		0.103713	0.955097	0.190814	0.994967	0.00290389	0.461503	0.367073	0.00914872	4.77391e-06	0.552063	0.31768	0.999001	0.144293	0.368237	0.139979
0.630476	0.0917856		0.0333631	0.277447	0.16378	0.988618	9.38958e-05	0.433697	0.451366	0.574654	0.0137525	0.449571	0.473596	0.933387	0.0146085	0.593886	0.266324
0.321168	0.120836		0.433877	0.67808	0.755121	0.998706	9.20065e-06	0.67947	0.451253	0.0462109	0.156032	0.345148	0.252476	0.934845	0.29518	0.457799	0.275783
0.537055	0.0218804		0.12936	0.810137	0.265262	0.953946	0.0434013	0.544051	0.00501013	0.390194	0.00447959	0.44241	0.343781	0.17545	0.144737	0.0643868	0.0711263
0.491459	0.456322		0.316616	0.590701	0.0611551	0.563326	0.00241376	0.413274	0.28565	0.99548	0.293378	0.631763	0.363048	0.736805	0.132609	0.314434	0.235181
0.311992	0.213619		0.386648	0.327039	0.0498619	0.00735516	1.84313e-05	0.502782	0.26552	0.95979	1.07409e-06	0.569641	0.114446	0.0780568	0.24657	0.239427	0.341049
0.444187	0.230201		0.49661	0.252498	0.160234	0.0681852	0.000196362	0.317921	0.00982174	0.981043	0.198845	0.497571	0.302233	0.881886	0.251226	0.143139	0.171086
0.415993	0.259548		0.037672	0.968329	0.168734	7.38257e-06	1.82509e-06	0.474152	0.515385	0.522019	0.354244	0.474187	0.252822	0.52978	0.021533	0.329416	0.260148
0.617487	0.553302		0.389131	0.595682	0.148836	1.75554e-05	0.000274188	0.515598	0.389769	0.924516	0.0287841	0.365645	0.276237	0.337254	0.0257819	0.237687	0.299043
0.179478	0.445073		0.158044	0.554632	0.180441	0.00144462	0.926701	0.756998	0.211421	0.481656	0.00306219	0.382287	0.376864	0.0716029	0.310324	0.302025	0.286576
0.649029	0.264468		0.341988	0.82787	0.0611985	0.913977	2.94892e-06	0.37055	0.344527	0.716896	0.771356	0.584031	0.349251	0.140706	0.108148	0.263435	0.314961
0.539364	0.320738		0.310219	0.596045	0.337175	0.983091	0.00139149	0.527413	0.324986	0.164261	0.0243229	0.462538	0.379675	0.966034	0.0153731	0.337423	0.125521
0.368469	0.0433215		0.338981	0.509727	0.0136446	0.707497	0.395772	0.522372	0.385716	0.298317	0.0895348	0.605436	0.354467	0.403575	0.0148735	0.2546	0.14251
0.438564	0.201782		0.00926143	0.42727	0.017288	0.997806	0.000221089	0.826792	0.176222	0.080474	0.101472	0.536648	0.388963	0.997414	2.16013e-05	0.19028	0.241802
0.423062	0.190498		0.202844	0.887528	0.20452	1.91738e-06	0.00071044	0.533404	0.179015	0.197749	0.346517	0.727556	0.146762	0.99854	0.314695	0.137453	0.693954
0.47777	0.0388538		0.148145	0.30733	0.0669889	0.707433	8.31898e-06	0.32857	0.411856	0.000649634	0.000242384	0.427052	0.545712	0.97789	0.0378456	0.258298	0.152488
0.375595	0.180325		0.280304	0.408109	0.0426109	0.638143	3.72821e-07	0.387723	0.0906904	0.00025761	8.8621e-05	0.486782	0.428204	0.450127	0.000243617	0.156465	0.0955285
0.599755	0.285811		0.18343	0.61797	0.176225	0.547402	0.0358163	0.357081	0.301315	0.522981	0.334243	0.459148	0.0606133	0.895062	0.104033	0.124484	0.191105
0.414349	0.108966		0.261005	0.811987	0.0944925	2.9334e-06	0.0361717	0.473044	0.313232	0.975941	0.000136309	0.410901	0.826373	0.999721	7.86924e-05	0.106442	0.341766
0.617666	0.0677382		0.468565	0.16005	0.00380989	0.991679	0.00340141	0.506198	0.331951	0.313717	0.411338	0.537606	0.306759	0.0256061	0.0885899	0.0818732	0.322549
0.249495	0.153341		0.27996	0.339688	0.0734892	0.0102777	5.89587e-06	0.648394	0.128562	0.0145374	0.0101515	0.350416	0.301411	0.347671	0.241483	0.553537	0.121416
0.322646	0.212603		0.470575	0.591334	0.221473	0.999822	0.000458587	0.399638	0.622693	0.124489	0.0150205	0.598187	0.06862	0.906325	0.00486874	0.458579	0.318169
0.634071	0.00992582		0.33738	0.998776	0.19616	0.994541	4.733e-06	0.468831	0.51171	0.108714	0.0484384	0.220464	0.309526	0.527584	0.0504717	0.62142	0.27799
0.621027	0.010734		0.0418866	0.0926544	0.0182278	0.639728	0.509731	0.982631	0.228116	0.00134994	0.458237	0.716944	0.330484	0.0149338	0.0389213	0.273398	0.0873695
0.420885	0.503985		0.666299	0.462323	0.0404087	0.5471	0.550973	0.456144	0.340325	0.555943	0.0487299	0.540599	0.315059	0.0606052	0.137208	0.158794	0.350491
0.0238869	0.453215		0.105207	0.0343486	0.12178	0.010877	8.92215e-05	0.373437	0.285852	0.104584	0.539594	0.391039	0.504586	0.450043	0.0366041	0.0904659	0.380269
0.790255	0.0760925		0.112286	0.603193	0.0790535	0.999418	1.69666e-05	0.484339	0.376643	0.295872	0.162929	0.589391	0.514014	0.121896	0.0552907	0.339198	0.325112
0.634816	0.294646		0.0524378	0.0522375	0.0443399	0.461446	0.489226	0.614392	0.289093	0.00154752	0.35777	0.275725	0.28479	0.0244412	0.000277261	0.250692	0.43577
0.280164	0.13432		0.477926	0.258859	0.345971	9.7145e-07	1.02138e-06	0.723471	0.380709	0.826322	0.0351412	0.567213	0.328129	0.274534	0.338698	0.350744	0.328111
0.249725	0.240946		0.314107	0.597945	0.106628	0.965836	0.14002	0.399072	0.283159	0.895594	0.495655	0.540412	0.281222	0.996357	0.0284901	0.250841	0
0.300733	0.4216		0.104986	0.524148	0.154322	0.000702174	1.95544e-05	0.507764	0.282865	0.00231852	0.00033235	0.407655	0.357289	0.0393471	0.000596543	0.167006	0.103594
0.369923	0.351289		0.451595	0.650205	0.236495	0.991479	1.51706e-05	0.406315	0.436846	4.47095e-05	0.697792	0.469299	0.424005	0.44331	4.5315e-05	0.201116	0.208491
0.501756	0.214044		0.396738	0.447237	0.274523	0.000698181	0.24544	0.492425	0.679398	0.512133	0.227468	0.467904	0.484205	0.24685	0.00130712	0.22229	0.238058
0.422495	0.298174		0.275866	0.432612	0.14175	2.69205e-05	5.61959e-06	0.391153	0.388093	0.00114251	0.0313858	0.181146	0.438457	0.849377	0.226583	0.280885	0.331705
0.582758	0.158732		0.306471	0.779154	0.224551	0.97202	0.0234045	0.451106	0.394209	0.571857	0.365357	0.594558	0.448334	0.585994	0.0337565	0.415194	0.267527
0.772915	0.00495698		0.256823	0.556274	0.149555	0.000349797	0.00792958	0.376193	0.36916	0.0207171	0.0300244	0.276	0.541276	0.907084	0.000872492	0.658708	0.54676
0.537902	0.408016		0.213497	0.977168	0.126649	1.11905e-05	6.22005e-06	0.651642	0.444429	0.507905	0.368436	0.445849	0.242985	0.212042	0.267012	0.449435	0.170321
0.362547	0.0361596		0.541155	0.50782	0.0160294	0.999973	0.0113561	0.135525	0.402428	0.716403	0.464764	0.404824	0.323438	0.969442	0.0166657	0.222857	0.291552
0.34107	0.370874		0.20418	0.348341	0.0529214	5.13187e-06	7.79764e-07	0.423045	0.322731	0.663334	0.343291	0.530936	0.247081	0.999982	0.13532	0.248004	0.318307
0.629138	0.333523		0.189307	0.222368	0.149136	0.999649	0.527685	0.4628	0.2997	0.40448	0.0908918	0.414209	0.325715	0.0538953	0.108033	0.158107	0.66259
0.53366	0.200311		0.546036	0.271017	0.058167	0.00396286	3.73921e-06	0.518992	0.430726	0.0235685	0.0651166	0.584407	0.33812	0.755272	0.268024	0.0500985	0.265008
0.205665	0.244462		0.0857261	0.0471077	0.0822503	0.000310089	0.00213108	0.447921	0.279164	0.999989	0.000581845	0.842177	0.430888	0.474503	0.00164882	0.754922	0.382839
0.525234	0.196788		0.517184	0.558972	0.397077	0.00486331	0.000341442	0.487453	0.00702154	0.0389644	0.404988	0.50132	0.318813	0.216226	0.0308417	0.701024	0.326256
0.666462	0.172395		0.35356	0.463266	0.380732	0.900882	0.63625	0.499716	0.310393	0.884945	2.70228e-05	0.574829	0.400625	0.994158	8.75943e-06	0.120938	0.393997
0.34913	0.249027		0.251963	0.957565	0.341522	0.857226	0.000280763	0.396465	0.430925	0.32672	0.106423	0.258435	0.396461	0.692224	0.119485	0.66335	0.0624383
0.21881	0.221696		0.0615879	0.435977	0.0618629	0.000108969	0.000719424	0.38419	0.477346	0.219659	0.456666	0.390689	0.39204	0.902623	0.235964	0.348007	0.213566
0.763717	0.375992		0.0724214	0.237847	0.0277089	0.00012453	1.37754e-06	0.216703	0.444348	0.0098112	0.0606257	0.579663	0.125278	0.174788	0.158995	0.12451	0.0254767
0.513804	0.347748		0.0350376	0.0901292	0.175397	0.0312551	0.000635701	0.396398	0.411774	0.113504	0.244468	0.412712	0.160592	0.285301	0.401049	0.729395	0.272575
0.455325	0.306245		0.25243	0.451641	0.000232514	0.000226493	0.557262	0.437299	0.335279	0.39104	0.37945	0.481032	0.384664	0.960253	1.66498e-05	0.147614	0.287402
0.43182	0.429655		0.393079	0.350555	0.335725	0.0146107	0.770674	0.501784	0.243455	0.00416129	0.088274	0.433151	0.339799	0.976439	0.152558	0.463945	0.16875
0.379164	0.412807		0.107003	0.180735	0.08127	0.000139619	0.120711	0.24731	0.0989712	0.0563957	0.0251252	0.701533	0.191876	0.234531	0.528866	0.242325	0.316162
0.433518	0.00173107		0.437176	0.511495	0.00670383	1	0.0208263	0.598722	0.448522	0.573782	0.00309605	0.491267	0.332284	0.996869	0.0581566	0.074805	0.236467
0.731044	0.160966		0.491057	0.842165	0.00682283	0.00166794	1.34083e-05	0.636617	0.276194	0.579309	0.271469	0.50147	0.322081	0.701733	0.141802	0.498529	0.241357
0.399092	0.654008		0.391455	0.610104	0.0243737	0.0679153	0.139407	0.563286	0.395736	0.074595	0.115011	0.466264	0.258624	0.01873	0.0312755	0.113151	0.262488
0.558768	0.333774		0.470617	0.681014	0.189444	0.971354	0.996921	0.998875	0.389946	0.0374979	5.37573e-06	0.372276	0.283337	0.0319451	0.094142	0.174205	0.203618
0.330712	0.00249893		0.127414	0.855987	0.146157	0.0692098	0.00155662	0.406663	0.324392	0.0957808	2.58695e-06	0.512705	0.444086	0.744194	0.212666	0.239123	0.15202
0.457062	0.232634		0.0170025	0.564521	0.218783	0.000833099	0.0125501	0.368501	0.506584	0.4678	0.14588	0.581595	0.307372	0.441132	0.00331259	0.361503	0.128725
0.320797	0.133959		0.344348	0.83367	0.253521	0.992703	0.899679	0.342245	0.231618	0.314503	0.358153	0.45075	0.201829	0.92293	0.0846412	0.437417	0.321089
0.539138	0.336087		0.189307	0.10252	0.209168	0.996529	0.00228697	0.286284	0.0338578	0.450936	0.0223643	0.522569	0.465853	0.923856	0.0778792	0.279393	0.320611
0.46444	0.0360931		0.160201	0.459875	0.097459	0.102458	2.24874e-06	0.921915	0.38581	0.133468	0.997808	0.821739	0.309201	0.297516	0.04032	0.306495	0.166799
0.736706	0.221257		0.279905	0.859667	0.104463	0.960377	0.874978	0.527985	0.231965	0.264292	0.271906	0.562038	0.205524	0.191292	0.102073	0.0575788	0.44384
0.832952	0.113062		0.425075	0.397558	0.160044	0.999992	0.0733544	0.19065	0.357868	0.0667947	0.355137	0.472353	0.338589	0.302269	0.277745	0.159775	0.105996
0.430641	0.465621		0.257332	0.543928	0.307202	0.352048	0.593412	0.490486	0.37141	0.272966	4.23806e-06	0.484102	0.484107	0.142195	0.0819538	0.403596	0.388956
0.394482	0.166221		0.393871	0.360863	0.0188201	2.96137e-08	0.000328853	0.259592	0.344373	0.00276811	0.0377088	0.644966	0.275813	0.999731	0.0785757	0.237923	0.255114
0.549346	0.353167		0.331657	0.625999	0.0900935	0.999996	1.26578e-06	0.472344	0.370603	0.0195288	0.010312	0.608795	0.363902	0.999997	0.230446	0.381881	0.187926
0.412105	0.0444883		0.0634931	0.462769	0.0376963	0.0190069	0.921783	0.617336	0.214432	0.221373	8.05915e-05	0.348355	0.527292	0.141515	0.0372211	0.282072	0.442053
0.514338	0.319282		0.266483	0.66901	0.00114831	0.000110026	0.43853	0.848689	0.297887	0.426155	0.0271141	0.418186	0.27511	0.600592	0.0854836	0.517916	0.312864
0.543838	0.195662		0.484421	0.951488	0.0241331	0.884806	0.00036873	0.493402	0.432765	0.999853	0.0634729	0.779552	0.463123	0.0688172	0.183583	0.516899	0.356259
0.50136	0.33471		0.400725	0.233111	0.075328	0.996497	0.000307175	0.40629	0.357837	0.00696616	0.0203903	0.391814	0.351248	0.0511239	0.052164	0.631641	0.152
0.554369	0.114465		0.0529951	0.708772	0.00410728	0.999061	0.0753885	0.682134	0.546458	0.51978	0.0262418	0.642922	0.469579	0.51355	0.260763	0.283039	0.227577
0.521545	0.00479689		0.434947	0.266981	0.0361698	0.995737	0.997191	0.342679	0.800522	0.580384	0.0131879	0.508061	0.316117	0.0442334	0.00242517	0.221725	0.1244
0.72922	0.0738483		0.349588	0.229932	0.0599456	0.896886	0.656528	0.452446	0.462871	0.553253	0.424325	0.662171	0.246562	0.0429822	0.171432	0.314858	0.222774
0.432261	0.18576		0.29681	0.948269	0.133537	0.928489	0.169062	0.493788	0.525474	0.10119	0.174801	0.269607	0.243301	0.534357	0.0636322	0.411344	0.321472
0.521662	0.119203		0.261005	0.548267	0.0333926	0.99928	0.0231299	0.535401	0.378599	0.0967811	0.000533005	0.952299	0.359097	0.0343255	0.28919	0.151032	0.130265
0.581338	0.343934		0.266371	0.315707	0.0278758	0.0217226	9.54151e-05	0.52466	0.371675	0.357971	0.40874	0.454461	0.23293	0.211421	0.0669931	0.591819	0.193456
0.147796	0.405406		0.182853	0.154756	0.462947	0.987923	1.30929e-05	0.345281	0.265956	0.61733	0.372	0.503836	0.389641	0.999808	0.00495236	0.154472	0.156325
0.900775	0.0694303		0.436765	0.704805	0.0452393	0.761778	0.0129733	0.617097	0.00464645	0.966375	1.50818e-05	0.87233	0.331613	0.0737009	0.220857	0.448941	0.269519
0.654121	0.1067		0.331242	0.134566	0.151265	0.0625295	7.2585e-07	0.457842	0.407836	0.665319	0.450428	0.581708	0.665436	0.0444376	6.33496e-05	0.148439	0.491149
0.662571	0.283511		0.240519	0.604948	0.0200848	0.960008	0.000616241	0.553487	0.277643	0.0109428	0.302332	0.23997	0.181406	0.807279	0.0369798	0.254806	0.536794
0.378515	0.373853		0.205562	0.981778	0.00333109	4.26561e-05	0.341743	0.252625	0.215583	0.0804267	0.105722	0.578775	0.383857	0.915967	0.294382	0.631386	0.330116
0.624601	0.150778		0.392163	0.38852	0.0915709	0.036573	0.0131748	0.425872	0.213786	0.999974	0.0618869	0.534371	0.300426	0.411493	0.00275898	0.0620453	0.537933
0.53897	0.394878		0.209861	0.660784	0.090005	0.824387	7.32526e-06	0.188293	0.222055	0.33136	0.00226754	0.595102	0.145517	0.234863	0.0761992	0.0302601	0.246854
0.750948	0.170927		0.656022	0.831653	0.0842152	0.230302	3.0164e-06	0.376218	0.416602	0.0267473	0.446633	0.489629	0.425377	0.8684	0.341495	0.393246	0.400919
0.648934	0.244027		0.14314	0.52158	0.384351	0.999958	0.0203588	0.573734	0.394788	0.533077	6.24986e-05	0.408925	0.430585	0.265034	0.00789923	0.0826247	0.420318
0.678729	0.317357		0.392996	0.528305	0.0113418	0.0392014	0.00127267	0.729329	0.316533	0.0938114	0.227622	0.309849	0.363474	0.0767965	0.190425	0.424944	0.358308
0.664711	0.199205		0.193343	0.527337	0.0215006	0.563091	3.40641e-06	0.154014	0.0258301	0.997997	0.074212	0.445272	0.599642	0.0863451	0.132022	0.182725	0.37998
0.457431	0.235202		0.445854	0.848395	0.0328704	0.967382	0.000119195	0.600326	0.261271	0.972522	0.384475	0.607717	0.479763	0.283369	0.00221905	0.944016	0.247466
0.592659	0.135455		0.121727	0.857276	0.357575	0.440079	3.47691e-06	0.638421	0.568621	4.63937e-05	0.708642	0.506979	0.281577	0.418368	0.169008	0.410751	0.527946
0.396896	0.0609625		0.0401292	0.403153	0.104187	0.94592	2.61904e-05	0.218455	0.493012	0.000555138	0.00315742	0.571429	0.337009	0.396728	0.0549491	0.287363	0.556242
0.481119	0.172547		0.307922	0.98199	0.0342815	0.995389	0.0110776	0.432191	0.265793	3.80458e-05	0.407004	0.212083	0.229253	0.0433229	0.00534633	0.356966	0.224413
0.402346	0.226735		0.0256268	0.336788	0.0291748	0.10229	0.112803	0.273943	0.2418	0.403665	0.351498	0.607398	0.391963	0.0101865	0.0726667	0.0627931	0.428553
0.339671	0.245478		0.398287	0.607926	0.0483326	0.22122	0.00302903	0.447757	0.575103	0.446823	0.00843136	0.428643	0.0920972	0.513566	0.0439311	0.249359	0.158084
0.597574	0.0327816		0.227868	0.342637	0.0476311	0.938431	2.36922e-05	0.540503	0.522529	0.29186	0.155154	0.473834	0.400446	0.472351	0.000297195	0.46048	0.229797
0.487612	0.312993		0.145131	0.43874	0.0517715	0.00121254	6.91507e-05	0.429291	0.00542652	0.248918	0.0475597	0.47493	0.435254	0.778709	0.751337	0.140989	0.529525
0.273648	0.317487		0.201914	0.17996	0.0592354	0.972792	0.00228697	0.160259	0.236074	0.75867	0.00116033	0.330178	0.316509	0.960253	0.364241	0.128638	0.311042
0.477864	0.100518		0.0695643	0.186192	0.000499297	1.72912e-07	0.134543	0.532416	0.49677	0.386006	0.112328	0.59271	0.341121	0.0638383	0.0126584	0.0754587	0.298895
0.770324	0.330238		0.47801	0.348012	0.000707158	0.0830288	0.977259	0.45427	0.450261	0.118488	0.0518703	0.2558	0.298424	0.0372625	0.180422	0.0599307	0.41136
0.517163	0.163206		0.350657	0.697916	0.20715	0.781065	0.0102621	0.931131	0.516381	0.995006	0.33844	0.608645	0.342759	0.93737	0.108166	0.285264	0.306377
0.8062	0.217419		0.190609	0.406681	0.139922	1.0935e-05	0.0105755	0.730506	0.0364085	0.381849	0.413743	0.459129	0.184809	0.374663	0.000136752	0.540883	0.56469
0.722864	0.00335798		0.0934791	0.305083	0.0532175	0.988326	0.00191557	0.25469	0.458342	0.00598592	7.15707e-05	0.579568	0.353201	0.214739	0.120285	0.0520764	0.321001
0.786512	0.471839		0.43465	0.474124	0.32319	0.000100599	5.46636e-05	0.365664	0.386558	0.485498	0.392664	0.461816	0.326198	0.118658	0.171431	0.0809053	0.384398
0.658807	0.0949758		0.358655	0.543202	0.29597	0.994933	0.0959148	0.587062	0.176734	0.483627	0.18053	0.467313	0.328577	0	0.0394826	0.329922	0.584687
0.358361	0.204015		0.0227492	0.0871432	0.328976	0.00151785	0.0256591	0.388854	0.00407579	0.214667	0.02836	0.540185	0.421671	0.0590954	0.0521509	0.23711	0.152803
0.070649	0.321648		0.160595	0.459943	0.0224287	5.56099e-06	0.000426846	0.430424	0.40204	0.735132	2.17133e-05	0.618791	0.327025	0.973944	0.00268965	0.276597	0.331769
0.734634	0.256175		0.340736	0.894514	0.0195514	0.998116	0.00628439	0.987845	0.488911	0.0301293	0.018976	0.419121	0.248859	0.590355	0.056577	0.308523	0.200701
0.600866	0.263365		0.13108	0.608537	0.00511111	0.324031	0.000489987	0.96788	0.036027	0.0927036	0.235969	0.489954	0.382882	0.247298	0.000764464	0.295558	0.366167
0.453205	0.0876327		0.0451477	0.578031	0.103115	0.974979	1.96749e-05	0.655619	0.158447	0.405514	0.158946	0.648766	0.464604	0.636326	0.117224	0.532589	0.223265
0.642636	0.13214		0.224321	0.368951	0.0111149	0.00851583	0.000161703	0.567595	0.192894	0.528252	0.128816	0.756628	0.126072	0.338034	0.517658	0.464871	0.41093
0.289575	0.170405		0.548235	0.813203	0.171491	0.0232508	0.00117814	0.753044	0.551058	0.733385	2.03439e-08	0.578443	0.475707	0.369403	0.0178593	0.0726001	0.183666
0.324379	0.204638		0.302158	0.676132	0.0216937	0.989385	0.000172136	0.401177	0.338253	0.519407	0.340116	0.615457	0.42305	0.297516	0.000289833	0.230418	0.334002
0.594703	0.287766		0.308764	0.590058	0.0206107	0.000180126	0.0130154	0.421666	0.439936	0.525498	0.458491	0.36727	0.339397	0.587694	0.335319	0.507986	0.249219
0.763916	0.0223759		0.228995	0.302482	0.0853631	0.0986528	4.64588e-08	0.494515	0.225526	0.0576323	0.00177408	0.473412	0.466184	0.251471	0.119271	0.407542	0.430452
0.341834	0.0104728		0.175927	0.538412	0.0198981	0.00387817	4.12848e-07	0.725639	0.453187	0.555943	0.0338683	0.453483	0.400901	0.62528	0.266308	0.282971	0.418863
0.405528	0.00169066		0.41731	0.175351	0.00400744	0.999798	0.00386582	0.955631	0.00899491	0.000782598	0.0299138	0.451886	0.211774	0.887169	0.0731561	0.365907	0.249978
0.544702	0.176922		0.595197	0.436347	0.0181639	0.988568	0.000598402	0.509413	0.435622	0.993831	3.11573e-06	0.196619	0.415418	0.463993	0.0684893	0.518033	0.405039
0.509856	0.292857		0.497883	0.572845	0.345518	0.545746	0.000892872	0.573025	0.337848	0.0706962	3.29593e-06	0.451002	0.29716	0.020344	3.67612e-05	0.307585	0.118363
0.419631	0.33999		0.263046	0.438422	0.281418	0.997973	3.60561e-05	0.51859	0.0077982	0.00979527	8.969e-06	0.722146	0.177166	0.883154	0.091799	0.191902	0.243964
0.700102	0.0579479		0.0952322	0.419074	0.588428	0.360786	0.00132169	0.461584	0.00192198	0.105108	0.194165	0.474023	0.373025	0.47084	0.0439424	0.248839	0.132215
0.350247	0.449107		0.0315093	0.540843	0.00373372	0.018058	0.510549	0.408029	0.149727	0.719986	0.0136963	0.42944	0.419783	0.0015414	0.019663	0.110795	0.282938
0.710371	0.211111		0.0884146	0.661435	0.31767	0.310375	0.535803	0.40654	0.36469	0.98917	0.334821	0.84281	0.503568	0.998561	0.0270892	0.170734	0.369864
0.521266	0.173276		0.256623	0.443645	0.0224554	0.0136211	0.0266481	0.328937	0.356263	0.398961	0.0611211	0.524763	0.41708	0.659488	0.324696	0.258266	0.11538
0.511109	0.0634317		0.00520614	0.462077	0.00771535	0.304786	6.31776e-07	0.308497	0.482375	0.734772	0.235368	0.794748	0.494699	0.277926	2.06106e-05	0.399624	0.300487
0.583533	0.252348		0.186482	0.800816	0.303401	0.0954069	0.519352	0.992594	0.175102	0.725693	0.428906	0.341146	0.103076	0.802011	0.0299322	0.261124	0.179804
0.166474	0.138009		0.134336	0.236154	0.325108	0.878085	0.000128856	0.861256	0.371489	0.287483	0.068373	0.566898	0.271504	0.814188	0.0140132	0.500133	0.276197
0.316873	0.352916		0.245077	0.515652	0.340683	0.0022753	0.000779486	0.290236	0.543761	9.75603e-06	0.0662525	0.481375	0.442776	0.136529	0.319732	0.19308	0.248978
0.664316	0.0238922		0.484421	0.557152	0.0165636	0.0150464	0.00358522	0.759653	0.393198	0.376335	0.033907	0.493081	0.521839	0.338959	0.072015	0.195807	0.317385
0.441946	0.00333609		0.32271	0.448051	0.36885	0.000230409	0.00127568	0.708332	0.133734	0.332622	0.148754	0.971839	0.304954	0.325515	0.201699	0.12243	0.191828
0.339577	0.0667645		0.323384	0.60758	0.214155	0.915126	6.29228e-06	0.384336	0.402294	0.773969	0.00647291	0.483766	0.208311	0.193755	0.407524	0.329171	0.0946954
0.537317	0.00513083		0.367101	0.037431	0.254931	0.921708	3.90904e-05	0.428797	0.330632	0.0545661	0.121498	0.420276	0.428392	0.014384	0.117496	0.329755	0.219404
0.449284	0.0128538		0.347836	0.819746	0.0238975	5.1882e-06	4.34109e-05	0.913525	0.215352	0.233715	0.00539989	0.567836	0.462104	0.422305	0.0157634	0.225449	0.369576
0.333861	0.19525		0.770355	0.454034	0.159967	7.59287e-05	0.0191788	0.367826	0.419339	0.209576	0.0810814	0.675573	0.206409	0.997975	0.0424588	0.75913	0.276092
0.791602	0.0341376		0.308645	0.30476	0.184487	0.961052	0.0217753	0.42693	0.431222	0.00117053	0.112068	0.578579	0.422079	0.0374762	0.137972	0.691662	0.390677
0.426371	0.280553		0.0616555	0.709154	0.0340827	0.990016	8.63598e-06	0.594752	0.225219	0.0263348	0.0788711	0.722186	0.335952	0.872933	0.196685	0.0754724	0.353698
0.192939	0.25838		0.391032	0.326819	0.00106904	0.999948	0.0363201	0.362926	0.451371	0.739239	0.124059	0.876665	0.269765	0.357183	0.398713	0.153835	0.0936317
0.883427	0.218761		0.0976302	0.474645	0.408251	0.999994	0.000609772	0.996797	0.190762	0.526406	0.00111014	0.431286	0.498317	0.157638	0.0288438	0.363755	0.604721
0.748124	0.156261		0.243383	0.508332	0.149606	1.18683e-05	0.932498	0.411377	0.342283	0.0172414	0.372936	0.726237	0.290073	0.873612	1.7434e-05	0.29725	0.276749
0.48442	0.371201		0.304827	0.998659	0.18622	0.96627	9.13485e-08	0.996899	0.180283	0.522403	4.3407e-05	0.620578	0.274481	0.161657	0.232297	0.554123	0.105996
0.506829	0.122983		0.302347	0.785204	0.0169098	0.00232218	0.928931	0.12726	0.518423	0.523255	0.49534	0.498893	0.472362	0.968632	0.160141	0.38149	0.402949
0.915793	0.221473		0.455278	0.523146	0.342765	0.998972	0.0005454	0.457038	0.37352	0.471996	0.0396633	0.455359	0.322368	0.0202251	0.00721416	0.625291	0.390377
0.103969	0.100929		0.30947	0.695438	0.322817	0.0987377	4.50283e-05	0.396359	0.497965	0.0322224	0.458646	0.480113	0.431753	0.0356445	0.00235155	0.241577	0.157086
0.569023	0.127453		0.329832	0.91863	0.386551	0.998356	0.584056	0.493739	0.353387	0.564809	0.322525	0.607729	0.375776	0.878914	0.00127564	0.779167	0.519187
0.272838	0.495783		0.292864	0.61198	0.259889	1	0.590207	0.357638	0.407882	0.756514	0.0775537	0.669683	0.212567	0.0544129	0.0864781	0.522813	0.279922
0.420665	0.267728		0.429143	0.559274	0.303624	0.94407	0.965223	0.481241	0.161779	0.43491	0.552456	0.524503	0.546785	0.90368	0.0729715	0.0336514	0.221481
0.0923387	0.148225		0.284571	0.286392	0.0122551	0.295332	3.61503e-07	0.986683	0.00847345	0.105888	0.327907	0.515674	0.405275	0.985331	0.0215947	0.402187	0.525438
0.284646	0.170609		0.187047	0.654182	0.145971	0.165817	0.00217012	0.462276	0.00486098	0.00963332	0.000112887	0.387454	0.378629	0.99535	0.00244453	0.620468	0.403844
0.626745	0.298956		0.321589	0.265025	0.0782112	0.0142939	0.0253887	0.444256	0.332545	0.166138	0.0582771	0.626171	0.275281	0.978029	0.224541	0.359301	0.29689
0.219458	0.158889		0.125348	0.739095	0.125383	0.235379	0.0619048	0.518469	0.299949	0.00425881	0.00411228	0.391338	0.441316	0.99898	0.0719057	0.381794	0.257755
0.268728	0.158887		0.215934	0.122602	0.0960622	0.450984	8.42721e-05	0.233042	0.118274	0.117166	1.0123e-05	0.501149	0.457314	0.0702041	0.000480125	0.200944	0.355478
0.231513	0.229975		0.172716	0.287765	0.0561918	0.9919	2.91946e-06	0.668523	0.262289	0.532241	0.050387	0.317631	0.334366	0.260769	0.0413149	0.216798	0.424537
0.570869	0.278988		0.432888	0.358262	0.046735	0.000718174	2.84093e-05	0.485465	0.336565	0.520448	0.112661	0.586415	0.264604	0.835879	0.0619777	0.536852	0.399766
0.322073	0.0107923		0.3729	0.733646	0.0872718	0.808604	0.000148422	0.810475	0.298961	0.193494	0.358752	0.549397	0.171462	0.037711	0.0804021	0.250127	0.225755
0.47897	0.0438848		0.280371	0.999049	0.0615802	0.00423243	0.215484	0.446369	0.465511	0.372733	0.191877	0.775128	0.281322	0.808982	0.0817578	0.509529	0.218443
0.270703	0.432906		0.303838	0.448908	0.0958239	0.998707	0.0035005	0.497683	0.256297	0.975941	0.0723625	0.53004	0.349246	0.184568	7.35065e-06	0.658236	0.252087
0.030871	0.477649		0.768287	0.34479	0.0453242	0.999639	0.635076	0.448098	0.258518	0.0474166	0.139403	0.828579	0.486333	0.313122	0.0963455	0.433632	0.0865358
0.478883	0.185343		0.345004	0.438142	0.0195658	0.984537	0.000139838	0.213617	0.000578169	0.443546	0.380625	0.691116	0.38373	0.265059	0.117149	0.327685	0.328429
0.0935926	0.419043		0.245477	0.607004	0.0394284	0.998579	0.766641	0.117623	0.50223	0.520682	7.02212e-09	0.467308	0.134423	0.0690705	0.00199556	0.460558	0.114431
0.257136	0.279262		0.316223	0.242264	0.106223	0.991792	0.000106579	0.478	0.413239	0.741366	0.348311	0.466416	0.387283	0.0917516	0.000109592	0.364493	0.527512
0.53202	0.330611		0.469795	0.215894	0.00584209	0.109089	0.0508141	0.418586	0.381197	0.0787001	4.07191e-05	0.815861	0.182105	0.0868795	0.394835	0.196582	0.207833
0.682775	0.06649		0.554397	0.35775	8.37419e-05	0.000120809	0.95926	0.596908	0.295747	0.509616	0.132332	0.455478	0.294437	0.988943	0.0320519	0.316411	0.308713
0.47889	0.592429		0.357062	0.586902	0.0513503	1	0.00073671	0.231737	0.410991	0.166337	0.144124	0.739037	0.24208	0.0809773	0.153605	0.200272	0.509695
0.686202	0.305841		0.113579	0.434775	0.131548	0.143545	0.0119931	0.422587	0.191806	0.551984	0.344994	0.50689	0.355635	0.507701	0.0178593	0.506153	0.280185
0.215692	0.45886		0.243777	0.43573	0.0738257	8.65436e-05	6.87296e-06	0.559441	0.403762	0.365018	0.283873	0.474416	0.325209	0.00690295	0.203236	0.195224	0.163323
0.280247	0.0615445		0.0339703	0.986355	0.0810426	0.892544	5.53471e-05	0.461092	0.176083	0.973804	0.255931	0.517315	0.33323	0.96381	0.0331153	0.617294	0.264043
0.44745	0.386055		0.291402	0.193764	0.0541872	0.628592	1.93406e-05	0.34431	0.326857	0.000248996	0.67236	0.445666	0.659865	0.411767	0.0482706	0.426173	0.146416
0.28185	0.0435822		0.174451	0.547164	0.0210043	0.0447377	0.000360353	0.933421	0.129188	0.0360815	0.344032	0.504247	0.499273	0.719814	0.107876	0.0628459	0.24276
0.386177	0.382471		0.197632	0.734759	0.00666476	0.381336	6.81214e-05	0.54834	0.613291	0.323473	0.405399	0.42329	0.476242	0.327979	0.345385	0.0919815	0.111055
0.3819	0.047878		0.208133	0.800267	0.214689	0.964736	1.02295e-05	0.705775	0.110595	0.300358	0.137193	0.341046	0.269387	0.120181	0.000131665	0.249971	0.346821
0.237991	0.314189		0.26021	0.781275	0.0565648	0.373151	0.0904116	0.492026	0.349937	0.999992	0.00458999	0.586682	0.384743	0.996783	0.239178	0.154475	0.427395
0.518335	0.202579		0.176944	0.705509	0.18423	0.000354156	2.46292e-06	0.258477	0.242967	0.756584	0.376961	0.470668	0.353295	0.853319	1.48476e-05	0.297051	0.423909
0.636541	0.206191		0.0260571	0.508489	0.0470107	0.957098	0.0223678	0.81024	0.476095	0.00452854	0.0822833	0.484637	0.337111	0.670127	0.00998942	0.0410909	0.645818
0.578726	0.144004		0.218038	0.356043	0.389807	0.96678	3.35981e-05	0.424708	0.262886	0.0140825	0.0074021	0.156846	0.146995	0.57642	0.0565279	0.242178	0.185443
0.420871	0.0993213		0.189307	0.132342	0.0829389	0.00309035	0.129353	0.435283	0.425767	0.979687	0.0647173	0.491202	0.12847	0.00932711	0.322042	0.5245	0.202456
0.175526	0.338654		0.413852	0.345783	0.0183073	0.508282	8.17987e-05	0.573077	0.447633	0.433277	0.00184949	0.212745	0.42002	0.729035	0.401773	0.0600231	0.283834
0.434979	0.241196		0.259884	0.808384	0.350472	1.70721e-05	0.0023816	0.632757	0.232463	0.00260068	0.225295	0.61568	0.399183	0.107309	0.0877283	0.442184	0.433002
0.279761	0.326353		0.298518	0.47125	0.00122078	0.997929	5.31145e-07	0.429917	0.285991	0.175836	0.293355	0.516927	0.359131	0.0724652	0.343318	0.530203	0.369524
0.292438	0.153474		0.433257	0.451928	0.108518	0.999702	0.00209086	0.336544	0.511123	0.745451	0.000550477	0.270587	0.420139	0.836002	0.107867	0.0780677	0.291499
0.412345	0.292289		0.174285	0.293289	0.0671835	0.99989	3.73137e-07	0.628146	0.493848	0.675762	0.54577	0.544242	0.397868	0.981632	0.0292153	0.196168	0.538208
0.625272	0.014203		0.299481	0.516079	0.208721	0.894853	0.0117761	0.227297	0.311535	0.229826	0.00533613	0.498303	0.279588	0.287986	1.53302e-05	0.403309	0.3405
0.444985	0.389777		0.420781	0.499448	0.125234	0.997548	0.999255	0.484889	0.444813	0.713979	0.149354	0.754337	0.40722	0.454007	0.00856757	0.22927	0.326145
0.206964	0.19361		0.116211	0.438572	0.0742091	4.44576e-05	9.16458e-06	0.676289	0.0138352	0.620943	0.0187484	0.273966	0.364724	0.462397	0.0225772	0.169462	0.277065
0.310036	0.324396		0.0515248	0.468822	0.0776126	0.999668	0.94194	0.970875	0.40996	0.63563	0.111757	0.220007	0.420852	0.421395	0.0338303	0.312529	0.285899
0.688851	0.484352		0.0943535	0.611969	0.0303877	0.968637	0.0429877	0.513007	0.307999	0.00525784	0.272671	0.381829	0.236454	0.682371	0.114137	0.101152	0.0727247
0.351608	0.349235		0.364261	0.471183	0.0576028	0.993393	4.5749e-05	0.140965	0.13127	0.65516	4.47263e-07	0.41409	0.246012	0.342488	0.05218	0.400915	0.157184
0.385145	0.361652		0.217959	0.0346125	0.10029	0.0723191	2.91137e-05	0.467259	0.313195	0.551984	0.177212	0.547819	0.427639	0.170631	0.0746437	0.475778	0.230587
0.461107	0.245157		0.22123	0.426651	0.00493642	2.12465e-07	0.00167235	0.947607	0.199531	0.668277	0.217241	0.473035	0.247022	0.882793	8.79703e-05	0.347204	0.170027
0.304532	0.458413		0.6057	0.530185	0.0246038	0.99938	0.00643361	0.885795	0.377084	0.260418	0.00045914	0.234851	0.360026	0.707849	0.00249546	0.363384	0.139892
0.387215	0.733091		0.635453	0.786089	0.29424	8.64492e-05	0.00311532	0.656085	0.28675	0.784158	0.0130449	0.327152	0.380096	0.430461	0.161005	0.457389	0.0567613
0.413833	0.184115		0.380184	0.307706	0.019533	0.0951358	2.31113e-05	0.339429	0.253414	0.0746188	0.328315	0.774467	0.40081	0.399489	8.65543e-07	0.164847	0.215774
0.0142852	0.290125		0.112066	0.605912	0.0202649	0.953475	0.00952244	0.415068	0.16025	0.0150028	0.000852479	0.421199	0.385895	0.828131	0.0714257	0.438859	0.130676
0.948483	0.0317983		0.378923	0.346481	0.066328	0.945174	1.10702e-05	0.508874	0.00742654	0.48999	0.391472	0.791534	0.407242	0.388652	0.0566111	0.613136	0.19874
0.965225	0.298566		0.260252	0.131404	0.0393943	0.997885	0.504917	0.496	0.452716	0.0775025	0.361436	0.494071	0.282094	0.999745	0.334024	0.0701901	0.5111
0.475798	0.216879		0.482042	0.418356	0.160933	0.000251366	0.616476	0.849605	0.553478	0.36776	1.07742e-07	0.410342	0.417974	0.907488	0.0363162	0.343816	0.310684
0.752824	0.213635		0.0404977	0.307719	0.0946882	0.307555	0.0216072	0.450272	0.484984	0.0518416	0.353262	0.755539	0.21193	0.36603	0.0516482	0.446821	0.320613
0.512775	0.506875		0.479614	0.507223	0.246961	0.0033146	0.0021948	0.755933	0.230904	0.136646	0.00250578	0.478322	0.420088	0.970887	0.13133	0.121623	0.304145
0.146456	0.0405849		0.297769	0.586638	0.345374	0.997215	0.947853	0.463271	0.337732	0.000445091	0.190493	0.575308	0.27276	0.35761	0.0991968	0.59181	0.206681
0.924168	0.263577		0.415419	0.857739	0.0115783	0.967097	0.00161726	0.322253	0.272278	0.00260223	0.278587	0.570635	0.266625	0.468545	0.000104487	0.197649	0.34899
0.524426	0.0454541		0.256491	0.809839	0.000508003	0.00469978	5.40467e-05	0.14648	0.14731	0.387361	0.31047	0.469056	0.446963	0.238018	0.0548006	0.319762	0.156669
0.461585	0.0995722		0.365302	0.459834	0.337284	0.0066718	0.000921515	0.587535	0.302658	0.00207973	0.350995	0.376305	0.213273	0.113772	0.298902	0.721444	0.170005
0.87501	0.00791876		0.140452	0.478818	0.130299	0.995998	0.603714	0.986219	0.188064	0.0158342	1.21737e-05	0.544434	0.471235	0.499916	0.159922	0.128435	0.410103
0.660392	0.391887		0.0346143	0.446799	0.0159031	0.069115	0.549786	0.569102	0.231136	0.547827	0.110328	0.203997	0.350432	0.203956	0.000162904	0.262974	0.283045
0.253557	0.159747		0.263925	0.511249	0.0155967	0.999555	0.000236091	0.992884	0.376915	0.00101475	0.00627389	0.367292	0.378704	0.999978	0.000596543	0.392227	0.369267
0.246875	0.755781		0.420569	0.68433	0.0609827	0.0389701	0.979278	0.550752	0.00953316	0.0894114	0.210602	0.464892	0.412517	0.368502	0.0796054	0.118314	0.199846
0.261566	0.172883		0.198648	0.793781	0.203191	0.903032	0.0118102	0.349443	0.439081	0.294508	0.352705	0.542614	0.289655	0.423124	0.130215	0.291035	0.234347
0.281189	0.069749		0.382825	0.0373183	0.205357	0.0235927	1.31942e-08	0.283766	0.314302	0.40487	0.0399414	0.382336	0.34433	0.996013	0.356746	0.376653	0.451403
0.47033	0.0202898		0.20483	0.0729813	0.128538	1.97272e-05	0.00541058	0.610417	0.0622123	0.00771241	0.193967	0.444038	0.269059	0.589601	0.00547847	0.262044	0.210883
0.567288	0.445616		0.355536	0.502487	0.370311	0.000814559	0.000180298	0.481926	0.223203	0.915226	0.0826558	0.583701	0.349758	0.447111	0.152945	0.241112	0.107738
0.523589	0.234901		0.127324	0.462947	0.0235285	0.0116934	0.00236976	0.845552	0.173994	0.00303625	0.0844892	0.460622	0.317599	0.991455	0.00743463	0.290815	0.148863
0.458354	0.244678		0.35058	0.437252	0.031344	0.0517127	1.87149e-05	0.701788	0.19206	0.00335407	0.120951	0.764672	0.443764	0.245639	0.0924453	0.320416	0.230871
0.397499	0.211597		0.0236722	0.363672	0.191632	0.999996	0.0973334	0.930487	0.268572	0.00378946	0.0514013	0.30531	0.27955	0.289582	0.00570418	0.393446	0.24636
0.796774	0.0573729		0.0976631	0.575521	0.112076	2.61216e-05	1.1239e-06	0.470791	0.314051	0.157786	0.0498226	0.469144	0.312842	0.180596	0.411476	0.112679	0.326559
0.442904	0.0232919		0.202572	0.462016	0.00036987	0.958336	0.984277	0.537752	0.445145	0.924898	0.396507	0.454504	0.275312	0.399602	0.0476771	0.390396	0.243941
0.604066	0.26103		0.382967	0.628056	0.292617	0.93396	1.9328e-06	0.491491	0.476984	0.344682	0.210533	0.488153	0.761047	0.132325	0.0657868	0.0732308	0.487051
0.335173	0.231626		0.0227492	0.449795	0.112769	0.998466	8.2871e-06	0.48027	0.506989	0.983095	4.74353e-11	0.612166	0.446616	0.996757	0.000221742	0.0519875	0.428121
0.369244	0.162152		0.0418282	0.377713	0.129679	0.915416	1.20511e-05	0.510807	0.434638	0.911175	0.000310426	0.226211	0.500578	0.999601	0.110616	0.24647	0.143707
0.282241	0.105122		0.117258	0.818563	0.319714	5.56203e-05	0.000516104	0.620292	0.122597	0.000152763	0.000164668	0.529439	0.473886	0.880383	0.478725	0.468102	0.237962
0.588981	0.265989		0.140009	0.624165	0.0929506	0.13464	1.70404e-06	0.165427	0.50288	0.472485	2.55029e-05	0.464383	0.226801	0.0687231	0.0673097	0.102256	0.0791356
0.692755	0.0669363		0.383551	0.972328	0.180459	0.98725	9.28178e-06	0.624844	0.128571	0.474034	3.67535e-06	0.44615	0.457703	0.165644	0.110749	0.446923	0.356487
0.655521	0.0260004		0.273884	0.822922	0.0164991	0.640209	0.000743412	0.44754	0.266539	0.00114251	0.0347366	0.166907	0.451851	0.256702	0.00644138	0.554721	0.306836
0.593881	0.0800352		0.152495	0.343403	0.209467	0.00668611	2.35838e-08	0.576578	0.000486814	0.58829	0.301081	0.149483	0.53207	0.946185	0.524044	0.263593	0.473853
0.397822	0.493757		0.390573	0.906694	0.0662395	0.921769	0.849294	0.450999	0.355631	0.475845	0.0147361	0.560226	0.487328	0.746166	0.262528	0.0915266	0.439427
0.35468	0.281812		0.422877	0.810453	0.0627955	0.999721	8.44877e-05	0.402987	0.341774	0.194685	0.0111352	0.544156	0.192774	0.0129648	0.0261784	0.158276	0.361862
0.440977	0.405498		0.4667	5.67088e-06	0.270233	0.0214555	0.152906	0.163445	0.144192	0.84118	0.0199804	0.862395	0.488444	0.252177	0.0883971	0.246254	0.268835
0.689007	0.227992		0.275571	0.382351	0.069811	0.892751	0.000222717	0.945007	0.326684	0.480932	0.323232	0.853805	0.347671	0.110543	0.145834	0.124475	0.456713
0.416227	0.187715		0.105118	0.456326	0.0240144	0.962528	6.93798e-05	0.999228	0.290582	0.9291	0.179301	0.260191	0.383186	0.586741	0.0746284	0.349671	0.501517
0.278444	0.213477		0.399223	0.461365	3.65996e-05	0.677576	1.59827e-05	0.409102	0.399624	0.000557365	0.393107	0.627368	0.186173	0.482668	0.0908432	0.10952	0.319929
0.299198	0.0298172		0.142557	0.373209	0.160108	0.999935	0.115932	0.46648	0.467492	0.677373	0.000318021	0.377153	0.364679	0.239147	0.00123579	0.811147	0.174734
0.584335	0.203		0.120316	0.701155	0.0795701	0.741992	0.136925	0.996416	0.431672	0.0191462	0.0130575	0.497319	0.133303	0.0440383	0.183665	0.542185	0.189637
0.727475	0.24577		0.235673	0.543912	0.318644	0.996594	0.736267	0.526758	0.371668	0.514508	0.0818819	0.558032	0.380676	0.376779	0.0647485	0.364196	0.111084
0.442464	0.0910959		0.49661	0.579447	0.155502	0.0435078	0.00836818	0.561285	0.539283	0.516116	0.10912	0.443196	0.229031	0.0857708	0.0847957	0.447501	0.255406
0.249042	0.0383274		0.413669	0.436276	0.174495	0.441302	1.32829e-05	0.459012	0.18515	0.00319238	0.338258	0.469938	0.589408	0.152381	0.268841	0.442118	0.380744
0.425434	0.235935		0.167863	0.440207	0.0746548	0.990236	5.13889e-05	0.354486	0.334337	0.00263535	0.268728	0.38372	0.153566	0.238049	0.0893574	0.480648	0.138176
0.395178	0.0745354		0.411854	0.46372	0.274645	1.42758e-06	0.863303	0.542192	0.443038	0.625647	2.97962e-05	0.556705	0.322044	0.711769	0.000874954	0.410833	0.360762
0.855608	0.493449		0.28458	0.941615	0.00873573	1.31358e-05	0.336716	0.451207	0.535275	0.434363	0.000143173	0.849358	0.324424	0.995212	0.0902657	0.373743	0.504927
0.760084	0.183867		0.359239	0.770293	0.22601	0.995989	0.00555499	0.458188	0.326644	0.333695	0.0380383	0.331044	0.36202	0.957527	0.00020123	0.0875659	0.396763
0.568689	0.0901304		0.0925282	0.337684	0.281276	0.296124	0.967194	0.936293	0.299142	0.853899	0.0464518	0.609636	0.313466	0.99989	0.279052	0.396357	0.405993
0.253705	0.130232		0.105258	0.351554	0.101844	0.228088	2.44399e-07	0.190344	0.36202	0.383817	1.0123e-05	0.398638	0.399039	0.0428349	0.0193865	0.147447	0.343174
0.570966	0.0318173		0.478976	0.547819	0.318745	0.945224	3.2755e-05	0.402215	0.334646	0.478866	0.00212936	0.516192	0.438901	0.288475	0.112183	0.298061	0.176638
0.317774	0.0708353		0.522438	0.213829	0.121609	0.999524	0.50315	0.644428	0.0795358	0.14177	0.00580257	0.568397	0.197741	0.550146	0.058025	0.12535	0.0395779
0.458288	0.468915		0.0620019	0.198148	0.0554504	0.000113559	0.00718889	0.605159	0.168145	0.151452	0.251535	0.595136	0.382719	0.873663	0.166623	0.179614	0.446339
0.635042	0.261005		0.0628943	0.651444	0.216656	0.999919	0.00988126	0.484567	0.412563	0.210338	0.165349	0.693488	0.379299	0.972907	0.132099	0.147374	0.343081
0.422836	0.0184304		0.353503	0.561152	0.173824	0.0148994	0.999997	0.877468	0.138965	0.632194	0.100644	0.482614	0.189866	0.00276281	0.08573	0.156559	0.0995823
0.305962	0.109789		0.284771	0.416377	0.246736	0.0316095	0.000854678	0.102451	0.576037	0.313183	0.0494116	0.613638	0.260033	0.735308	0.0179745	0.273954	0.0759817
0.576962	0.166243		0.182031	0.722009	0.102199	0.991167	0.972103	0.465387	0.471022	0.386473	0.392433	0.500115	0.455539	0.0686763	0.00190383	0.514252	0.526411
0.543761	0.561247		0.0876137	0.626037	0.249162	1.04491e-05	0.0032059	0.486524	0.338552	0.847557	0.0167495	0.577062	0.343552	0.959126	0.0023182	0.0928013	0.032618
0.287676	0.117596		0.440626	0.531894	0.332785	0.487081	0.81866	0.517807	0.3699	0.0795381	0.321488	0.358781	0.508517	0.344604	0.0155225	0.354179	0.13566
0.666104	0.154755		0.138094	0.79379	0.0753712	0.000204245	3.21177e-06	0.6139	0.30966	1	0.0144459	0.542374	0.224846	0.993083	0.0294603	0.0557967	0.214254
0.250762	0.206498		0.305666	0.578698	0.0506525	0.996486	0.000172576	0.462551	0.322931	0.118064	0.00101711	0.454087	0.237988	0.658242	0.323369	0.231901	0.218473
0.686525	0.0670385		0.23002	0.481885	0.126979	0.00935993	0.00443229	0.539755	0.327432	0.0746188	0.205695	0.63021	0.284136	0.202191	0.128678	0.166164	0.239902
0.603579	0.451516		0.376446	0.321531	0.249136	0.919607	0.0026809	0.384466	0.333016	0.198369	0.24362	0.472847	0.444065	0.981991	0.0150884	0.285422	0.321962
0.463724	0.272177		0.381384	0.854902	0.336495	0.00915947	0.518971	0.403739	0.00108528	0.368506	0.0924482	0.726532	0.131664	0.858905	0.00089152	0.430073	0.156218
0.293187	0.034502		0.296318	0.558906	0.0492622	0.00735634	7.86799e-07	0.316657	0.051645	0.939748	0.312366	0.254863	0.371539	0.128101	0.00342169	0.475778	0.271756
0.327374	0.111194		0.217741	0.334745	0.221286	0.991034	0.000186638	0.224751	0.371992	0.364502	0.00077515	0.538457	0.354992	0.0280881	0.135608	0.283919	0.353655
0.328199	0.194505		0.0487282	0.207842	0.206681	0.00135808	0.359258	0.377243	0.161224	0.454631	0.282701	0.378676	0.167145	0.962287	0.00167059	0.147376	0.274367
0.369945	0.352227		0.276873	0.493017	0.0906799	0.00964664	0.0209388	0.945125	0.324416	0.000176046	0.0369932	0.622668	0.473907	0.504245	0.580236	0.337242	0.395325
0.608148	0.278768		0.0841027	0.126574	0.273326	0.520111	0.999996	0.874947	0.171991	0.0455092	0.343412	0.510179	0.305707	0.384679	0.0731059	0.262992	0.186058
0.241188	0.21064		0.725806	0.716874	0.269811	0.000569735	1.09307e-05	0.438828	0.335057	1	0.643808	0.353672	0.429911	0.0449202	0.119988	0.49573	0.36185
0.445158	0.017427		0.0551407	0.425157	0.0192647	0.997244	4.54916e-07	0.193025	0.386756	0.80367	0.08764	0.328102	0.289536	0.336206	0.099047	0.766013	0.260238
0.534441	0.247883		0.38526	0.109659	0.175939	0.625525	0.962726	0.536647	0.553745	0.238967	0.192556	0.463982	0.21669	0.0781795	0.184582	0.302374	0.337461
0.618431	0.364399		0.308764	0.721177	0.0520374	0.00939047	0.0154576	0.499751	0.31566	0.343747	0.160111	0.50035	0.202842	0.0262413	0.305029	0.134024	0.444871
0.322305	0.33983		0.306407	0.713159	0.0796632	0.0198762	1.79007e-05	0.0540135	0.512352	0.0254044	0.000829779	0.339209	0.359608	0.0111213	0.169989	0.222308	0.355266
0.247936	0.128061		0.527336	0.340067	0.421726	0.994481	0.306797	0.41573	0.387124	0.348496	0.0866473	0.388199	0.33432	0.997107	0.0283841	0.131941	0.246663
0.91699	0.0559075		0.310838	0.391772	0.173548	1	5.96081e-06	0.360926	0.283383	0.495877	0.00215111	0.555692	0.4431	0.824722	0.0255419	0.580232	0.209708
0.410978	0.0448788		0.0284369	0.261117	0.618431	0.62554	3.1875e-06	0.52956	0.452371	0.0512339	0.339177	0.544242	0.19166	0.30617	3.23921e-05	0.229334	0.229321
0.712074	0.28268		0.262704	0.598577	0.171263	0.000477928	1.51965e-05	0.737614	0.959596	0.081157	0.0857667	0.327253	0.359614	0.215738	0.00583596	0.376676	0.248698
0.714512	0.184583		0.44413	0.643665	0.0594433	0.995413	0.409169	0.372789	0.270891	0.490959	0.113839	0.595216	0.400333	0.0358783	0.0320269	0.244281	0.174582
0.121197	0.159485		0.305603	0.967653	0.0353847	0.999661	0.00623919	0.442724	0.0561071	0.0437073	0.00140086	0.727085	0.465464	0.2428	0.283546	0.496292	0.312511
0.318433	0.402698		0.0269301	0.526706	0.0392509	0.870524	0.887682	0.530736	0.327603	0.366128	0.191978	0.465573	0.236111	0.516569	0.245153	0.354765	0.521979
0.560228	0.132619		0.369042	0.342889	0.029867	6.29738e-05	1.09919e-05	0.541963	0.368691	0.00928626	0.307844	0.487404	0.35338	0.334616	0.187898	0.3142	0.119421
0.0852284	0.014631		0.0628943	0.815336	0.12198	0.821042	4.3149e-05	0.545354	0.245294	0.741126	0.119568	0.702193	0.388982	0.93724	0.0723616	0.342374	0.0495451
0.753078	0.0269176		0.218038	0.643349	0.0282108	0.997007	0.000693603	0.397068	0.464705	0.348892	0.464598	0.465098	0.343087	0.111128	0.000132605	0.432532	0.28476
0.251356	0.328077		0.225311	0.37657	0.056547	0.00274822	4.71637e-05	0.435185	0.335141	0.081157	0.181519	0.0732681	0.24288	0.900242	0.104033	0.26282	0.466053
0.262518	0.209732		0.0317859	0.57204	0.0489769	0.997807	2.29439e-06	0.458237	0.401334	0.4666	0.0662339	0.590808	0.275634	0.289641	0.0890261	0.369139	0.239305
0.198954	0.283976		0.0196462	0.97501	0.116445	0.867522	0.0855041	0.473575	0.190616	0.00131442	0.0504534	0.58761	0.26555	0.271849	0.000264197	0.484098	0.651867
0.69923	0.170815		0.373359	0.49695	0.278472	0.449351	1.00815e-06	0.474809	0.268333	0.00270143	0.071519	0.165507	0.219872	0.430436	0.0098619	0.183942	0.36325
0.607953	0.119298		0.150521	0.588154	1.89306e-05	0.742172	0.00430003	0.452614	0.36995	0.498926	0.00294744	0.686325	0.427853	0.50413	0.101191	0.0992978	0.313778
0.567827	0.0234263		0.174532	0.484594	0.0735228	0.00123132	0.000332413	0.500873	0.222557	0.00461228	0.0584062	0.7164	0.392619	0.623424	0.0395853	0.348277	0.0827714
0.527645	0.178168		0.0184787	0.87626	0.0326966	0.084444	1.41544e-08	0.304524	0.42719	0.102875	0.568283	0.533855	0.332492	0.0372698	0.10889	0.228355	0.229802
0.502292	0.156975		0.219508	0.256771	0.000487966	0.0109739	0.000122446	0.37556	0.439634	0.479035	0.0492406	0.797574	0.45438	0.640175	0.355776	0.341342	0.458252
0.713263	0.0621713		0.0230266	0.654511	0.0997484	0.977029	0.0377439	0.940882	0.082483	0.117371	0.00923245	0.380838	0.0685582	0.0658075	0.00952428	0.358268	0.312229
0.380028	0.218115		0.312292	0.82633	0.122173	0.0804923	0.00105033	0.506203	0.186117	0.37575	0.00778829	0.516711	0.365185	0.0180298	0.0609438	0.125638	0.2336
0.452917	0.240665		0.133791	0.135411	0.050592	0.593111	2.42024e-07	0.556078	0.35847	0.699524	0.490086	0.401762	0.298855	0.026734	0.295407	0.286974	0.27275
0.29818	0.358793		0.081425	0.921341	0.0069534	0.000239079	0.641036	0.42477	0.270785	0.0602714	0.000130359	0.436841	0.298835	0.447664	0.0200972	0.34215	0.436613
0.631099	0.133743		0.422877	0.158177	0.0625862	0.00356934	0.0195034	0.866069	0.35343	0.23062	0.221894	0.446312	0.352512	0.999883	0.543435	0.161965	0.418571
0.404486	0.230951		0.498051	0.546408	0.106912	1.89042e-05	0.0313728	0.418362	0.373485	0.0739799	0.445846	0.837858	0.520322	0.0306853	0.00038561	0.945477	0.118055
0.284633	0.390717		0.362258	0.509743	0.208901	0.829483	0.0341151	0.742851	0.424816	0.708352	0.339726	0.691813	0.42712	0.680852	0.0247023	0.654127	0.452175
0.331118	0.0641029		0.0382067	0.812659	0.246486	0.000346108	0.0154422	0.36397	0.42318	0.657366	0.0565541	0.447501	0.43738	0.451209	0.144451	0.291292	0.220919
0.942262	0.0121001		0.349263	0.440485	0.00563187	0.197115	0.982669	0.520605	0.45868	0.00430601	0.388126	0.746902	0.349816	0.999884	0.223045	0.721504	0.168086
0.405526	0.273397		0.132125	0.838764	0.113167	0.142866	0.00123532	0.504684	0.394752	0.0775263	0.240562	0.234395	0.372691	0.361835	0.2081	0.760357	0.299304
0.65855	0.00456446		0.122248	0.735043	0.133642	0.425543	2.08021e-05	0.434682	0.331832	0.684759	0.00100748	0.863884	0.436518	0.746166	0.130313	0.375309	0.136423
0.352388	0.169542		0.274949	0.0115781	0.0272166	7.7885e-05	2.6402e-05	0.535337	0.0746897	0.216503	0.0558086	0.532948	0.38941	0.401305	0.0616317	0.0815913	0.323044
0.193075	0.0320739		0.423756	0.467863	0.000853556	4.42769e-05	0.00360574	0.954605	0.368769	0.307826	0.29217	0.499587	0.353159	0.528888	0.134426	0.363644	0.545229
0.423997	0.196913		0.381431	0.953221	0.00521531	0.748429	0.00193926	0.445806	0.174061	0.337161	0.32249	0.541069	0.150578	0.16397	0.00320865	0.0797265	0.304275
0.425105	0.361898		0.353733	0.717701	0.186823	0.555511	0.0392345	0.803648	0.427266	0.292503	0.170069	0.514359	0.425337	0.725294	0.000154389	0.163984	0.270949
0.687557	0.131305		0.179094	0.468593	0.00034121	0.000868234	9.133e-05	0.454492	0.41059	0.0219391	0.013017	0.538105	0.318915	0.0459282	0.0123401	0.601314	0.352821
0.470982	0.246959		0.0956822	0.300366	0.0499295	0.606213	2.58932e-07	0.556149	0.380931	0.359378	0.0040865	0.481843	0.399086	0.0243476	0.226717	0.3148	0.113103
0.225751	0.00065473		0.555197	0.0722804	0.00262718	0.0013405	0.381572	0.668229	0.342634	0.540529	1.2479e-07	0.50755	0.252377	0.603037	0.000191868	0.232251	0.256188
0.839279	0.208773		0.450962	0.238584	0.000314151	1	2.99364e-05	0.657727	0.144187	0.0828435	0.0235637	0.422338	0.334053	0.113853	0.000136752	0.032383	0.355172
0.373646	0.149899		0.546372	0.434913	0.0382789	0.999791	0.0375581	0.364956	0.371659	0.334717	0.000522086	0.440985	0.391123	0.376492	0.00108986	0.482418	0.0175023
0.189788	0.218766		0.416589	0.538776	0.550679	0.13467	1.2826e-05	0.42004	0.350606	0.0164999	0.343199	0.458038	0.137222	0.290718	0.0433617	0.126955	0.508031
0.399257	0.108385		0.0702554	0.738097	0.0600628	0.820358	0.00573105	0.282452	0.491169	0.0410276	0.0380556	0.442542	0.515287	0.183423	2.16087e-06	0.528099	0.182163
0.365724	0.298309		0.0822514	0.410247	0.168365	0.976756	0.220491	0.498583	0.375804	0.999786	0.400568	0.448287	0.368212	0.191342	0.17899	0.0555919	0.206291
0.691342	0.245673		0.327317	0.385135	0.0545398	0.0214664	0.00198728	0.518021	0.444333	0.996816	0.339826	0.27656	0.446668	0.77701	0.0871772	0.276338	0.322588
0.275874	0.156318		0.31039	0.299638	0.189507	0.994267	2.077e-07	0.423003	0.380407	0.0389812	0.223644	0.530288	0.127816	0.474541	0.119768	0.372558	0.408379
0.471405	0.356772		0.194043	0.617719	0.0698365	0.9759	1.33822e-06	0.351104	0.301527	0.0927599	0.0608436	0.639999	0.26351	0.305378	0.212863	0.737778	0.233096
0.304563	0.254787		0.529219	0.634301	0.0056128	0.719775	0.000249671	0.432024	0.241265	0.0889546	0.237453	0.70467	0.413044	0.957941	0.012317	0.439448	0.361904
0.308579	0.339579		0.415419	0.486411	0.181709	0.0521975	1.4662e-05	0.612866	0.418586	0.551673	0.118375	0.462389	0.365516	0.622106	3.52314e-07	0.236128	0.350366
0.513259	0.0703883		0.143623	0.297013	0.161366	0.99904	0.00120243	0.378412	0.359519	0.449916	0.061942	0.256841	0.256601	0.999959	0.0658908	0.415697	0.307904
0.70424	0.204733		0.150006	0.147586	0.0202478	0.264246	0.00147503	0.570974	0.53436	0.0315612	0.610255	0.647359	0.296655	0.215674	0.039295	0.389045	0.316973
0.0447939	0.029241		0.0721469	0.387979	0.0520031	0.988837	0.000216573	0.733189	0.182516	0.345016	0.000407987	0.526129	0.399572	0.477378	0.174807	0.120122	0.155712
0.564944	0.000576182		0.17203	0.458522	0.00854802	5.60687e-05	0.00445	0.702575	0.100438	0.661663	4.7226e-05	0.460347	0.342354	0.0494177	0.0806665	0.022691	0.240049
0.376145	0.298575		0.428223	0.398361	0.350466	0.0155662	0.00464313	0.665951	0.359345	0.00732233	0.191877	0.531893	0.308556	0.0884778	0.723975	0.0298804	0.403202
0.311839	0.267031		0.599706	0.477565	0.128278	0.993801	0.81162	0.380431	0.348102	0.579315	0.00765132	0.2968	0.254396	0.0411969	0.000816286	0.171995	0.274335
0.848284	0.0282416		0.131268	0.580258	0.137988	7.9244e-06	0.00334869	0.761779	0.298238	0.285647	0.0920721	0.557181	0.363836	0.356772	0.00615113	0.0738511	0.116128
0.191968	0.293344		0.123648	0.154067	0.0497546	0.00291272	0.46625	0.52587	0.207559	0.258167	3.49329e-05	0.446513	0.317199	0.0241331	0.258962	0.420305	0.294163
0.390569	0.320342		0.0591695	0.510843	0.316188	1.01744e-05	0.258618	0.395106	0.460536	1.27354e-05	0.0802521	0.656327	0.287008	0.999836	2.01048e-06	0.125014	0.199997
0.578035	0.0527514		0.0454236	0.109606	0.0486826	0.000420277	0.0175298	0.526793	0.378817	0.0301325	0.184655	0.553777	0.416007	0.342184	0.000384199	0.322171	0.182411
0.571976	0.325565		0.262331	0.647301	0.0361655	0.441124	0.00352532	0.478366	0.300058	0.394648	0.285645	0.461948	0.637716	0.788936	0.0309262	0.278312	0.354156
0.445553	0.193936		0.274011	0.596088	0.134558	2.1026e-05	0.51522	0.572653	0.389847	0.0559074	0.0264097	0.731595	0.412009	0.439737	3.52314e-07	0.67103	0.263363
0.531717	0.443579		0.263046	0.412094	0.00420547	0.614623	1.30374e-07	0.420437	0.0409778	0.0916445	0.383861	0.575523	0.312876	0.0698845	0.145277	0.861135	0.273671
0.376454	0.239099		0.470893	0.758272	0.000152654	0.000242674	0.00632731	0.475801	0.436296	0.0539127	0.134127	0.523	0.385055	0.143993	0.207477	0.362079	0.319639
0.1926	0.0395408		0.309336	0.858152	0.177029	0.543767	0.00244821	0.350234	0.385563	0.0222718	0.240894	0.762158	0.351811	0.858139	0.339224	0.353287	0.232393
0.213101	0.0151486		0.141899	0.625893	0.230605	0.991934	0.510044	0.445615	0.317179	0.368018	0.0168536	0.418285	0.363213	0.172411	0.0537664	0.0355737	0.181676
0.57187	0.206265		0.229869	0.181804	0.0520477	0.596836	0.394055	0.365475	0.391411	0.865984	0.0589152	0.529254	0.448755	0.471024	0.0040639	0.391172	0.205124
0.37329	0.388868		0.355443	0.589403	0.408908	0.99684	0.00192341	0.579089	0.423866	0.65028	0.261846	0.330063	0.374585	0.92017	0.0371355	0.482459	0.313971
0.235421	0.136861		0.300382	0.66178	0.0147415	0.995324	1.52021e-05	0.555164	0.294642	0.474009	0.170894	0.601906	0.558938	0.0498025	0.0868674	0.424098	0.101011
0.358013	0.147774		0.170277	0.389782	4.85456e-05	0.59697	0.461379	0.511611	0.307063	0.594337	0.366004	0.481047	0.443838	0.24149	0.0778401	0.205853	0.0684793
0.703501	0.300245		0.238953	0.906067	0.101387	0.986567	0.338223	0.45119	0.325303	0.318365	0.00110945	0.271122	0.420308	0.027122	0.232727	0.1603	0.465002
0.301768	0.244785		0.355536	0.537202	0.677211	0.0137148	0.143463	0.477266	0.372243	0.0174879	0.0166642	0.197974	0.331711	0.601571	0.296284	0.260677	0.14198
0.627851	0.0570407		0.471491	0.744983	0.118884	0.99057	0.00332168	0.95731	0.00182657	0.48352	0.613782	0.717523	0.237044	0.614404	0.0157195	0.262908	0.2993
0.946951	0.154821		0.263449	0.998865	0.00165231	0.000118363	0.00328281	0.729112	0.152629	0.453251	0.0501582	0.39346	0.203451	0.362633	1.57188e-05	0.533821	0.44294
0.633945	0.273855		0.283255	0.911639	0.0208159	0.994181	0.000197152	0.431344	0.343877	0.362636	0.0168386	0.280704	0.209732	0.994976	0.160103	0.0587809	0.159446
0.519706	0.02778		0.085718	0.822244	0.399887	0.121525	0.890152	0.453649	0.551723	0.00786971	0.0687687	0.342928	0.409108	0.702139	0.000480125	0.291198	0.27023
0.564194	0.168304		0.43475	0.437259	0.0360838	2.99216e-05	0.636151	0.611133	0.215103	0.782071	0.00981962	0.545942	0.367464	0.0142618	0.0144837	0.427559	0.141536
0.333201	0.242679		0.344686	0.792498	0.153181	0.995395	0.977327	0.712081	0.364971	0.518378	0.0208516	0.456051	0.306085	0.259114	0.107586	0.445808	0.463639
0.406545	0.00867034		0.411712	0.163783	0.377235	0.774698	0.205907	0.417587	0.300166	0.490675	0.010239	0.57362	0.240912	0.233134	0.0200972	0.397739	0.226527
0.870187	0.0873113		0.231896	0.382349	0.137852	0.998904	5.8553e-05	0.544777	0.263811	0.00886875	0.275931	0.630397	0.156851	0.386379	0.602541	0.591303	0.111167
0.337071	0.357804		0.495402	0.700132	0.08831	0.848028	4.44049e-05	0.528582	0.319214	0.507	0.00170306	0.492749	0.435196	0.24946	0.000712602	0.416037	0.291337
0.38934	0.300867		0.07258	0.241303	0.000191062	0.0284871	0.00330531	0.516979	0.521168	0.00427547	5.33823e-06	0.420748	0.231553	0.715603	0.130215	0.561658	0.430666
0.418589	0.4232		0.459002	0.40499	0.0314359	1.92202e-08	0.000319752	0.871661	0.213408	0.481083	0.339655	0.530098	0.244717	0.118377	0.00010303	0.217939	0.347128
0.739532	0.192103		0.19216	0.488355	0.168591	9.15555e-06	0.000115279	0.362123	0.353581	0.0060768	0.0497353	0.5751	0.414926	0.0894472	0.0695428	0.455002	0.276054
0.453846	0.202212		0.410509	0.487988	0.175296	0.0443355	1.80473e-05	0.457319	0.141542	0.0207781	0.294778	0.43858	0.379623	0.550827	0.000775974	0.372054	0.256079
0.925862	0.026702		0.317119	0.974039	0.0492582	0.835642	0.281042	0.508539	0.554554	0.781415	0.136861	0.511511	0.12197	0.685513	0.0259246	0.366746	0.200086
0.87892	0.21116		0.0293582	0.978279	0.128823	0.968533	0.900001	0.36449	0.498014	0.108151	0.0013271	0.450691	0.285553	0.774684	0.0375225	0.647092	0.101411
0.484956	0.0407563		0.378203	0.539983	0.291625	0.0713525	0.0155968	0.501977	0.289714	0.727949	0.000642245	0.477316	0.424804	0.472557	0.15625	0.386629	0.386557
0.690282	0.529521		0.259144	0.623869	0.082319	0.880255	0.863908	0.460679	0.0925182	0.0551008	2.74164e-05	0.338213	0.323788	0.999886	8.19887e-06	0.0409298	0.244856
0.544396	0.199423		0.15372	0.484831	0.325645	0.999806	0.585143	0.992058	0.387588	0.724491	0.0430204	0.477236	0.296676	0.505199	0.0203101	0.234449	0.194536
0.268742	0.361961		0.143707	0.982229	0.320242	0.159379	8.3922e-07	0.565143	0.450301	0.50734	0.19384	0.461927	0.331838	0.321384	0.0436443	0.301549	0.252194
0.970205	0.276523		0.0292411	0.237397	0.400426	0.000574789	0.784586	0.483412	0.0702938	0.689786	0.47077	0.628783	0.31631	0.609882	0.214445	0.516644	0.252293
0.276511	0.172957		0.371601	0.684933	0.177731	0.99983	1.44692e-06	0.622788	0.500893	0.203629	0.00399178	0.797395	0.182916	0.0187399	0.362967	0.15223	0
0.479885	0.00235862		0.00926143	0.380684	0.0983889	0.999909	2.18574e-05	0.422812	0.0791254	0.00106811	0.104917	0.577759	0.231914	0.0765411	0.11381	0.285841	0.171846
0.343419	0.169144		0.38526	0.783279	0.513066	0.994355	1.69276e-05	0.485455	0.396959	0.379939	0.023938	0.25981	0.496464	0.848469	0.048658	0.137848	0.22178
0.627484	0.359088		0.352949	0.288541	0.109389	0.999993	1.57469e-05	0.843736	0.483697	0.0891614	0.0342607	0.619622	0.404939	0.384458	0.583449	0.143401	0.552108
0.747913	0.553085		0.122416	0.591563	0.0122337	0.999999	6.12031e-06	0.3918	0.00503188	0.426894	0.00163261	0.517928	0.28834	0.997138	0.0616468	0.526732	0.311495
0.466732	0.201388		0.262331	0.532695	0.0124978	0.996227	0.243126	0.974	0.380456	0.081914	0.283564	0.650066	0.178906	0.0197013	0.840518	0.0374117	0.140493
0.392149	0.184036		0.195378	0.718815	0.0122237	0.302272	0.683748	0.464926	0.397697	0.996873	0.0474892	0.480642	0.335871	0.996582	0.00246443	0.284921	0.244734
0.471188	0.277634		0.468388	0.316807	0.204302	0.00108585	0.188971	0.473146	0.456445	0.00168351	0.000111647	0.55729	0.252836	0.386102	0.0524693	0.0212283	0.48101
0.573977	0.21212		0.203437	0.186034	0.273138	1	4.44643e-05	0.629816	0.489518	0.519527	0.0308152	0.417171	0.293596	0.088499	0.100356	0.347376	0.247237
0.548755	0.145478		0.480387	0.813342	0.0606364	0.999988	2.02923e-05	0.445527	0.352671	0.441781	0.0680701	0.456974	0.187789	0.0347458	0.00060782	0.188563	0.273286
0.466684	0.287764		0.445428	0.740063	0.238413	0.980637	1.08087e-07	0.684737	0.31476	0.20134	0.00237039	0.421563	0.381382	0.0736066	0.12762	0.357753	0.35318
0.373499	0.179183		0.416133	0.658243	0.00907388	0.927773	0.54142	0.554784	0.0512635	0.515117	0.000411668	0.46785	0.131795	0.996183	0.0772994	0.127462	0.328403
0.117462	0.211163		0.0262386	0.276566	0.0319726	3.25826e-06	0.110928	0.556847	0.347011	0.0247003	0.160445	0.446585	0.479739	0.787195	0.21074	0.417108	0.149936
0.696853	0.100534		0.229831	0.900913	0.167165	0.998644	0.74451	0.193811	0.255689	0.403434	0.310484	0.488125	0.524597	0.625754	0.346261	0.557636	0.109886
0.462956	0.153667		0.105723	0.712218	0.0388689	0.929886	0.00244821	0.470039	0.55355	0.0847897	0.188063	0.272195	0.369298	0.0538953	0.27573	0.458133	0.269178
0.436203	0.0320216		0.329832	0.348076	0.0801892	0.637183	0.608348	0.432853	0.217976	0.705355	0.0320166	0.534112	0.141193	0.0444782	2.06106e-05	0.641085	0.296608
0.304666	0.487856		0.204959	0.16052	0.0613328	0.996619	0.0137876	0.27307	0.22168	0.129205	0.229693	0.600829	0.327937	0.578923	0.257064	0.580042	0.272234
0.534966	0.183544		0.491259	0.375173	0.109943	7.97286e-06	0.588221	0.540235	0.151229	0.00446255	0.0628802	0.463005	0.300505	0.362267	0.102593	0.345062	0.202105
0.378454	0.302104		0.353545	0.60774	0.200408	0.994235	3.27015e-05	0.51668	0.20159	0.255832	0.00219808	0.400965	0.340807	0.998617	0.235472	0.161737	0.0805044
0.364602	0.116657		0.329832	0.553762	0.153995	0.00187603	0.00113971	0.456962	0.598251	0.821343	0.347927	0.575995	0.183494	0.176301	0.204664	0.274381	0.207386
0.337682	0.15437		0.28627	0.363257	0.125008	0.40344	0.712256	0.431044	0.194074	0.503723	0.000614629	0.41606	0.296594	0.559749	0.0893112	0.202221	0.397699
0.624124	0.455755		0.301005	0.354774	0.219042	0.965052	0.233924	0.286952	0.485264	0.569829	0.00087342	0.248895	0.426688	0.168633	0.0725445	0.455844	0.413532
0.497439	0.316906		0.0998678	0.58075	0.172158	0.999921	0.000928487	0.570808	0.357379	0.973589	0.00204205	0.424286	0.420335	0.384138	6.54229e-07	0.158431	0.421155
0.452762	0.325754		0.301927	0.333012	0.00574854	0.999573	0.0114146	0.34799	0.0148549	0.15217	0.211186	0.509177	0.317832	0.18338	0.139346	0.336775	0.378944
0.750929	0.0249676		0.175927	0.702146	0.440744	0.749105	0.653336	0.443164	0.442049	0.976237	0.583643	0.424361	0.466173	0.944344	0.217336	0.313291	0.207874
0.384461	0.344767		0.347567	0.253986	0.341305	0.00189835	0.000814872	0.312372	0.318303	0.512855	0.00599435	0.490485	0.439184	0.0320367	0.145653	0.416389	0.406697
0.53205	0.316358		0.136169	0.417586	0.169523	0.00599675	0.00333216	0.836492	0.451685	0.346371	0.300423	0.585143	0.436655	0.975624	0.3573	0.101526	0.354541
0.359491	0.496595		0.266391	0.325429	0.344255	6.29472e-07	3.36534e-07	0.588935	0.248753	0.463651	1.65008e-06	0.597753	0.374286	0.162923	0.257492	0.352119	0.241462
0.411912	0.360165		0.252928	0.431562	0.201169	0.969454	0.0014351	0.409189	0.0251574	0.500413	0.262118	0.312186	0.250485	0.427643	0.229787	0.304186	0.0161146
0.587596	0.265928		0.151306	0.795795	0.0368315	0.00246909	0.000647921	0.379596	0.40051	0.293335	0.0619682	0.413328	0.366812	0.156049	2.04183e-05	0.364338	0.336877
0.558773	0.173181		0.369715	0.365596	0.303246	0.995531	5.11836e-05	0.518337	0.157783	0.477038	0.423686	0.438677	0.430864	0.203925	0.235622	0.484735	0.134097
0.497112	0.222591		0.262939	0.46582	0.157549	6.08626e-07	0.0158176	0.54748	0.252919	0.0415249	0.00113874	0.342165	0.453842	0.162852	0.0864712	0.0660975	0.366287
0.869733	0.00559145		0.283641	0.820905	0.252212	0.628502	0.999296	0.463017	0.188878	0.00221941	0.00804538	0.4486	0.334001	0.264244	0.0849408	0.420363	0.244827
0.733209	0.389982		0.309336	0.847701	0.300736	0.00416882	0.000815012	0.8316	0.143317	0.307607	0.200879	0.648426	0.272937	0.996863	0.059874	0.150145	0.368545
0.409685	0.04329		0.298055	0.630434	0.0430092	0.668882	0.562964	0.280615	0.586498	0.896711	0.385059	0.438457	0.353885	0.398365	0.180485	0.110542	0.186174
0.778402	0.681123		0.367101	0.400831	0.0160733	2.27646e-07	4.01822e-06	0.42699	0.43588	0.577499	0.133867	0.50005	0.17584	0.141591	0.258551	0.140161	0.218181
0.527807	0.31994		0.34826	0.55949	0.20226	0.0547335	0.213514	0.470416	0.292717	0.595209	0.342012	0.836409	0.46605	0.329887	0.394218	0.184681	0.410682
0.25562	0.244989		0.158044	0.527704	0.271744	0.999383	0.000688706	0.38087	0.268727	0.51978	7.50106e-06	0.458994	0.472712	0.0606778	0.0665911	0.564769	0.309888
0.566921	0.237574		0.0253576	0.618804	0.108117	0.275391	0.106258	0.285718	0.344696	0.12226	0.371376	0.337569	0.170106	0.76091	0.0166709	0.0922618	0.314819
0.448249	0.340181		0.336813	0.453539	0.24072	0.928832	0.000637853	0.328056	0.194377	0.00299324	0.255402	0.549138	0.499564	0.0880381	0.0771633	0.406177	0.345824
0.296024	0.573763		0.165451	0.378596	0.0276267	0.837461	0.00806688	0.559775	0.397595	0.037131	0.223036	0.165947	0.404845	0.166463	0.144482	0.164535	0.211372
0.0129534	0.018914		0.119622	0.839307	0.115902	0.338579	0.0132829	0.425809	0.0120073	0.147732	0.0165255	0.185149	0.519154	0.191933	0.0281223	0.308815	0.223581
0.357644	0.304396		0.394215	0.290597	0.108288	0.524293	8.80882e-09	0.695	0.0147355	0.780316	0.0515751	0.512656	0.32495	0.286538	0.074481	0.0344784	0.310844
0.941801	0.492579		0.368621	0.360624	0.40535	0.979967	3.50766e-06	0.397745	0.423184	0.440837	0.070843	0.508081	0.405323	0.0534457	3.819e-05	0.173133	0.368818
0.595081	0.0678829		0.307922	0.0110475	0.210362	0.986564	0.218114	0.629927	0.475703	0.999807	0.360056	0.334194	0.316851	0.778194	0.126901	0.314074	0.387964
0.532422	0.190278		0.29476	0.627175	0.104353	0.00389192	0.000809277	0.126407	0.187836	0.925309	0.385449	0.322508	0.226576	0.622809	0.0434856	0.312059	0.324755
0.38127	0.0691297		0.240931	0.834056	0.0516528	0.324813	0.000695313	0.656888	0.30452	0.427675	4.76282e-06	0.584901	0.479871	0.068786	7.90814e-05	0.589673	0.215052
0.0527659	0.281494		0.283641	0.477121	0.0243424	0.0098108	0.00527489	0.324336	0.426598	0.655698	0.104493	0.509578	0.531618	0.965443	0.57147	0.368577	0.252664
0.400148	0.0934194		0.0934791	0.501979	0.00967771	0.0993701	1.22038e-05	0.577156	0.382849	0.0828682	0.0274869	0.347053	0.464397	0.609531	0.0137789	0.554609	0.367017
0.509321	0.353986		0.426086	0.48353	0.130398	0.988222	0.999945	0.937519	0.459308	0.0039375	0.000552561	0.450462	0.456311	0.99758	0.00943535	0.0899704	0.402403
0.428592	0.228528		0.49297	0.5274	0.0441298	0.532749	0.715448	0.862552	0.377578	0.62072	0.104527	0.431693	0.367234	0.989913	0.181945	0.0651885	0.259381
0.516602	0.163109		0.107275	0.410035	0.120755	0.00571277	3.01355e-06	0.593586	0.379887	0.686047	0.309741	0.270274	0.424575	0.993542	0.0735301	0.307634	0.582049
0.0154906	0.317359		0.180675	0.727214	0.0132638	0.00281437	0.302126	0.997881	0.266944	0.014568	0.419171	0.504864	0.447266	0.157823	0.174504	0.263586	0.173848
0.408188	0.180181		0.0515248	0.525517	0.0103572	0.000123381	0.081386	0.124932	0.00248466	0.805426	0.276471	0.456931	0.392823	0.488885	0.333123	0.321399	0.170595
0.392594	0.027756		0.14078	0.475638	0.045988	0.0280593	1.0123e-08	0.339852	0.41077	0.0154167	0.435285	0.645795	0.430821	0.999992	0.217476	0.575209	0.204587
0.29397	0.244959		0.0531458	0.481408	0.0814051	0.990416	0.000276581	0.968656	0.539975	0.281393	0.0216516	0.589289	0.469088	0.194766	0.0420855	0.410044	0.585851
0.401329	0.339096		0.298735	0.00331946	0.398813	0.840991	0.000843678	0.118994	0.167203	0.395133	0.309365	0.485261	0.411996	0.725811	0.277935	0.0528625	0.271003
0.231089	0.136368		0.227868	0.936243	0.54723	0.00633584	2.38938e-07	0.381111	0.426841	0.321635	0.247712	0.455949	0.417501	0.0941583	0.223189	0.310466	0.204705
0.277092	0.00828157		0.17552	0.417463	0.0349471	0.997137	0.995184	0.458577	0.141098	0.300426	0.0338787	0.640715	0.302272	0.57156	0.157023	0.172367	0.311064
0.545364	0.326759		0.173883	0.213897	0.253387	0.369781	2.86335e-06	0.310036	0.492488	0.765235	0.349661	0.422718	0.131693	0.213515	0.233684	0.30202	0.570397
0.570016	0.313507		0.0835936	0.761033	0.029478	0.947585	0.000301979	0.256453	0.565652	0.000413233	0.386882	0.270939	0.198038	0.32443	0.0054606	0.54433	0.254086
0.577929	0.690359		0.144068	0.688523	0.0884057	0.394256	1.71141e-08	0.942312	0.242514	0.747014	0.107391	0.645468	0.409299	0.44311	0.00452907	0.288731	0.248343
0.335535	0.401072		0.462777	0.460399	0.000934078	0.0105592	0.000545382	0.662234	0.405237	0.81002	0.0903275	0.590074	0.39577	0.1019	0.01985	0.766273	0.2946
0.621968	0.294127		0.437176	0.506309	0.109494	0.978033	7.77921e-06	0.432747	0.42004	0.0130531	0.167064	0.57797	0.320943	0.0584676	0.00135487	0.00473321	0.346335
0.379695	0.11057		0.0522263	0.94457	0.0506989	0.00775954	0.00466321	0.447882	0.299403	0.553074	0.0256949	0.625469	0.4218	0.767896	0.768377	0.13328	0.185409
0.543374	0.000191619		0.261866	0.621202	0.00111443	0.000338606	2.45121e-05	0.539086	0.440098	0.184776	0.0496397	0.565813	0.450422	0.0417991	0.0656907	0.135794	0.675522
0.446963	0.168445		0.362258	0.787999	0.054417	0.968778	3.40026e-07	0.61393	0.64539	0.866877	0.296117	0.464383	0.502026	0.465147	0.049906	0.299383	0.378083
0.438009	0.295716		0.431422	0.180686	0.0459725	0.736457	0.992185	0.202321	0.520856	0.481205	0.000820619	0.256908	0.411465	0.483065	0.214811	0.345244	0.183204
0.741893	0.280994		0.234279	0.405972	0.157364	2.89732e-05	0.995358	0.707051	0.381092	0.0131128	0.0658744	0.449193	0.281949	0.774684	0.00810252	0.343413	0.0980221
0.659571	0.198547		0.125838	0.457294	0.303637	3.23347e-05	0.0113327	0.469761	0.381241	0.0417597	0.13247	0.452344	0.293547	0.785524	0.0290611	0.25526	0.395452
0.485064	0.170854		0.159824	0.715574	0.0649118	0.846195	0.0173773	0.701657	0.0952668	0.405913	0.0173383	0.27757	0.429922	0.969442	0.24657	0.292222	0.424918
0.394962	0.497078		0.330288	0.354974	0.131624	0.98654	1.15437e-08	0.446136	0.37349	0.0724467	0.0248212	0.508808	0.300503	0.0400813	0.22935	0.252862	0.353295
0.547876	0.0756346		0.355536	0.439196	0.0481454	0.993058	4.71095e-05	0.516615	0.487646	0.547627	9.16016e-05	0.664112	0.299958	0.430174	0.0496792	0.662835	0.179819
0.952042	0.196541		0.329392	0.7298	0.0502178	0.999952	0.999466	0.446434	0.483087	0.0024672	0.207943	0.427518	0.527668	0.0803724	0.00130532	0.304748	0.0808773
0.289937	0.204615		0.261005	0.78746	0.0173277	0.97529	5.35083e-07	0.0983941	0.220739	0.00312197	0.0164645	0.827451	0.371251	0.134418	0.000492615	0.441853	0.330539
0.29935	0.152175		0.222029	0.627281	0.0484257	0.995944	9.27706e-05	0.423988	0.264383	0.00204857	0.0167022	0.259412	0.184715	0.459126	0.0947812	0.176478	0.342646
0.247574	0.499358		0.309674	0.307625	0.137406	0.94166	0.000481731	0.634619	0.571057	0.180132	0.203903	0.583621	0.564062	0.361827	0.0379591	0.263193	0.409246
0.489211	0.128752		0.29011	0.994661	0.0321045	0.999979	0.000152708	0.795745	0.560672	0.348556	0.0285991	0.403925	0.21946	0.548314	1.78421e-05	0.357733	0.2276
0.294971	0.385348		0.381651	0.591679	0.0513283	0.998685	4.44111e-06	0.379465	0.485511	0.00484782	0.0714054	0.70579	0.42001	0.317674	0.266826	0.302588	0.108331
0.209033	0.0787347		0.405567	0.476655	0.013866	0.901044	3.62741e-06	0.709055	0.385273	0.63549	0.0307445	0.595302	0.580271	0.746388	0.00854743	0.138995	0.562422
0.933204	0.385048		0.188577	0.952739	0.0952506	0.972598	1.1053e-08	0.431231	0.0895636	0.599637	0.278427	0.41363	0.146445	0.502013	0.0562474	0.475079	0.418373
0.939115	0.160916		0.156929	0.278399	0.0118088	0.995679	0.000306888	0.553158	0.433029	0.752642	1.3584e-05	0.468641	0.469106	0.151666	0.192876	0.476864	0.367066
0.252002	0.220694		0.0841027	0.322972	0.0528692	0.870129	0.989077	0.439592	0.533225	0.0497841	0.241519	0.424275	0.358663	0.996062	0.46643	0.691056	0.309136
0.669525	0.45037		0.271387	0.393132	0.000146776	0.995609	0.0012761	0.38423	0.36032	0.53537	0.574568	0.359937	0.238524	0.0758231	0.527297	0.135311	0.397407
0.639053	0.0962351		0.266982	0.636892	0.0216863	0.170455	4.43517e-06	0.630923	0.533677	0.667897	0.199601	0.576595	0.158334	0.0990689	0.198247	0.498932	0.224448
0.231023	0.285724		0.146981	0.0230083	0.019782	0.00850019	0.000558453	0.991373	0.373822	0.496893	0.476557	0.195197	0.412163	0.124426	0.000633927	0.160638	0.0835872
0.548465	0.18769		0.385037	0.4286	0.211987	0.0881861	0.991324	0.295631	0.391903	0.30849	0.475205	0.425985	0.219975	0.698967	0.00038561	0.699218	0.275664
0.425339	0.088013		0.224126	0.93454	0.270354	0.0231097	4.63921e-05	0.598162	0.00471887	0.00433411	0.0559885	0.462125	0.271846	0.997894	0.486515	0.409997	0.123585
0.599874	0.325878		0.409811	0.389864	0.123125	0.46777	0.0952361	0.145771	0.390919	0.0212178	0.315606	0.776371	0.434868	0.999776	0.0216211	0.172437	0.190733
0.270057	0.183993		0.429143	0.712081	0.0499431	1.64783e-05	1.02464e-07	0.880235	0.0090903	0.941272	0.260588	0.435259	0.305042	0.990677	0.199029	0.0532817	0.193286
0.925544	0.022412		0.0208298	0.0326368	0.0764137	0.999936	0.0041654	0.265487	0.371524	0.228234	0.436458	0.486057	0.346668	0.340255	0.0615235	0.348809	0.189352
0.732208	0.14119		0.303073	0.34335	0.000273157	8.34979e-05	3.84089e-05	0.390673	0.406984	0.333797	0.044581	0.939409	0.363362	0.853821	7.36231e-05	0.363179	0.373061
0.887413	0.00264392		0.0930348	0.519546	0.433392	0.998892	0.00104102	0.45667	0.161013	0.151282	0.160814	0.517566	0.137342	0.0273535	6.19624e-05	0.551862	0.428341
0.365373	0.234664		0.260769	0.0220938	0.0130727	0.00960017	0.111165	0.778229	0.454068	0.229543	0.289809	0.456969	0.4463	0.999996	0.0174311	0.328931	0.565755
0.714606	0.376283		0.126834	0.480903	0.147833	7.29524e-06	9.02621e-05	0.637322	0.27384	0.0802087	0.13386	0.643935	0.30685	0.193864	2.76065e-05	0.383449	0.39564
0.405294	0.404457		0.136134	0.371622	0.0329335	0.621592	3.47621e-07	0.368891	0.0634244	0.5915	0.031628	0.427833	0.368539	0.744612	0.107519	0.171944	0.105266
0.268441	0.284744		0.0980046	0.453115	0.010871	0.999933	2.94516e-10	0.850244	0.392911	0.897388	0.00226152	0.51252	0.140981	0.639061	0.0235883	0.460865	0.351665
0.34195	0.209789		0.17552	0.0853062	0.256403	0.0342258	0.000253721	0.573318	0.39909	0.0775973	0.000399708	0.446695	0.420847	0.328479	0.0122355	0.297581	0.0614848
0.309868	0.00762771		0.0496623	0.855809	0.119011	1.02955e-05	6.9852e-08	0.919683	0.145344	0.357821	0.245694	0.277885	0.400418	0.0417991	0.00210487	0.445412	0.171188
0.383502	0.215525		0.462178	0.406168	0.157519	0.000178549	0.0970492	0.338643	0.349128	0.0739799	0.370878	0.519608	0.332183	0.998581	0.0524197	0.707104	0.231287
0.841783	0.0754971		0.163288	0.45867	0.257327	0.201721	0.201726	0.382684	0.451915	0.816266	0.169331	0.499876	0.42894	0.314224	0.0500831	0.0483111	0.181901
0.33822	0.173754		0.108424	0.645958	0.230571	0.00716897	0.847066	0.575128	0.31297	0.516498	0.621232	0.461675	0.379431	0.367792	0.431053	0.038952	0.419998
0.224739	0.237656		0.552214	0.857024	0.0555843	0.000621529	0.693598	0.457287	0.0501664	0.281455	0.0560395	0.504611	0.474104	0.171531	0.284247	0.510795	0.197382
0.30198	0.334074		0.189307	0.903239	0.0341724	0.657006	0.000171635	0.711687	0.223477	0.992618	0.306322	0.608012	0.450665	0.296882	0.0430456	0.217612	0.546084
0.331143	0.0168388		0.443209	0.821625	0.220929	0.0141795	0.239921	0.519578	0.333481	0.899573	0.00473108	0.508308	0.294352	0.752831	0.0718238	0.374788	0.350208
0.3663	0.198456		0.336784	0.641977	0.167163	0.0047312	5.8637e-05	0.555228	0.166304	0.686569	0.265071	0.898097	0.169533	0.398963	0.149782	0.0517662	0.265638
0.421576	0.5043		0.482042	0.764204	0.0301761	0.998799	0.000502183	0.492412	0.510943	0.751957	0.0588967	0.531984	0.470542	0.543038	0.000154129	0.297434	0.406566
0.550666	0.127991		0.462855	0.304731	0.0284806	0.527369	0.129225	0.654089	0.265089	0.795025	0.42112	0.499758	0.446458	0.368882	4.06583e-05	0.273586	0.549513
0.352953	0.255162		0.364973	0.280038	0.0476167	0.999996	0.130368	0.334695	0.434344	0.63752	0.206556	0.500157	0.456581	0.794083	0.0127591	0.565336	0.294378
0.677172	0.651565		0.120434	0.435911	0.000218056	0.500861	0.998875	0.158556	0.120441	0.634908	0.0771732	0.246355	0.299105	0.915861	0.21354	0.176283	0.089668
0.0320065	0.0263282		0.124169	0.935708	0.0284827	0.00988466	5.05145e-08	0.378673	0.364222	0.831335	0.0941714	0.439768	0.394174	0.617791	0.357827	0.134062	0.394925
0.309647	0.144399		0.0260571	0.784678	0.130712	0.509068	0.239913	0.585435	0.156429	0.830517	0.0162833	0.391197	0.431054	0.947545	0.029868	0.465557	0.275562
0.618592	0.107928		0.395913	0.282771	0.00141982	8.18865e-05	5.51537e-05	0.721519	0.388273	0.249039	0.339205	0.430674	0.313474	0.981965	0.165339	0.373572	0.198115
0.370589	0.280449		0.146479	0.0789061	0.14677	0.998442	0.0563775	0.958111	0.25666	0.885924	0.000511543	0.284487	0.277791	0.996629	0.265433	0.228152	0.335146
0.782234	0.27236		0.351218	0.466219	0.00536269	0.0506992	0.0466708	0.571914	0.40541	0.00306302	0.0027825	0.636105	0.342915	0.927391	0.0517281	0.494697	0.111484
0.210176	0.100092		0.476051	0.104662	0.231159	0.822254	3.58966e-05	0.133165	0.214634	0.507659	0.170894	0.442375	0.36248	0.934108	0.116614	0.65255	0.251058
0.399597	0.240478		0.486587	0.333546	0.148351	0.831063	0.424461	0.569504	0.427573	0.481636	4.81619e-07	0.490843	0.154239	0.918471	0.0101101	0.236147	0.434296
0.570964	0.186449		0.34354	0.724806	0.0465337	0.9916	0.000377131	0.429631	0.413953	0.0152373	0.432236	0.543563	0.172809	0.978983	0.0243731	0.488443	0.312668
0.292327	0.00376413		0.137989	0.567762	0.220352	0.954184	0.000289008	0.150432	0.114195	0.570058	0.0076909	0.375914	0.380836	0.286565	0.0224603	0.166551	0.457964
0.745641	0.435873		0.329812	0.48499	0.226377	0.533396	2.51455e-06	0.987695	0.0168888	0.0174631	0.0663158	0.673139	0.423581	0.00836887	0.738244	0.262166	0.172829
0.776214	0.170748		0.0707451	0.40243	0.150371	0.941651	0.536315	0.300083	0.361839	0.00324911	0.00904529	0.429868	0.285474	0.902508	0.0481237	0.529528	0.442585
0.338215	0.143467		0.0259333	0.391647	0.287822	0.00421249	0.994696	0.491602	0.402815	0.00160328	0.249843	0.365088	0.466103	0.417862	0.204066	0.114373	0.329542
0.153002	0.198489		0.148853	0.378081	0.0376433	0.0427565	0.000997383	0.640661	0.352668	0.813876	0.0517109	0.476309	0.489347	0.147248	2.09602e-05	0.731751	0.249751
0.719146	0.190367		0.0199986	0.907657	0.0779166	0.93057	0.996722	0.367682	0.426875	0.106688	0.105631	0.434039	0.435794	0.933331	5.28592e-06	0.769667	0.283906
0.409533	0.0276102		0.473916	0.295485	0.00088413	1.26627e-05	0.0478211	0.339804	0.3535	0.962391	0.00277812	0.446695	0.285942	0.197581	0.0920054	0.415263	0.403564
0.213353	0.183398		0.294956	0.5974	0.0503088	0.990371	0.0361446	0.189296	0.00674219	0.0606393	0.428906	0.573425	0.42164	0.997468	7.56024e-06	0.149937	0.252704
0.266219	0.153986		0.261923	0.319611	0.205093	0.468359	0.143522	0.367283	0.400832	0.524663	0.0538221	0.483247	0.20816	0.366699	0.11022	0.208888	0.389822
0.14617	0.0832957		0.280304	0.545122	0.0705766	0.974259	0.00145885	0.532601	0.148238	0.0312223	0.0294792	0.562834	0.413121	0.670589	0.0860167	0.12964	0.59341
0.760371	0.132477		0.286411	0.529588	0.296024	0.954693	0.000121087	0.499474	0.000853342	0.993279	0.0294792	0.227699	0.431866	0.95941	0.0797283	0.779645	0.142316
0.596399	0.00166379		0.453906	0.497806	0.0539951	0.685291	0.00097545	0.557304	0.474393	0.0117517	0.174451	0.886826	0.456349	0.0848594	0.0815406	0.332139	0.439843
0.302269	0.267866		0.466227	0.243519	0.00170674	0.385779	6.26447e-06	0.998372	0.228225	0.802322	0.143017	0.377681	0.508854	0.362144	0.000235983	0.0890438	0.343724
0.414835	0.302462		0.254006	0.0701885	0.0184586	0.142319	0.000368698	0.997803	0.351116	0.0186893	0.00104522	0.831407	0.0443789	0.940307	0.0356133	0.253094	0.575427
0.451717	0.282707		0.0687595	0.826211	0.00914985	4.235e-05	1.16467e-05	0.44232	0.510324	0.0284417	0.408258	0.544698	0.278777	0.346099	0.206396	0.158677	0.373826
0.130179	0.0412783		0.269628	0.314041	0.00131754	0.0774031	0.00188766	0.246697	0.469772	0.0308147	0.366004	0.578206	0.460396	0.0675979	0.281987	0.338453	0.329521
0.28005	7.37163e-05		0.269857	0.62761	0.497404	0.99918	0.83519	0.300698	0.0992895	0.00130103	0.0739002	0.482717	0.358866	0.252304	0.00135104	0.294185	0.333541
0.521359	0.0208672		0.364973	0.640047	0.138013	0.83265	0.00141014	0.462467	0.522585	0.794694	0.12784	0.684175	0.478862	0.711221	8.19887e-06	0.301428	0.272602
0.564241	0.39164		0.408484	0.583598	0.0908026	0.462993	0.150817	0.383317	0.582983	0.662776	0.0491181	0.453656	0.47839	0.990424	0.0127627	0.649829	0.416984
0.20749	0.128143		0.151111	0.746329	0.00633874	0.868694	7.35004e-05	0.255211	0.386435	0.979562	2.7528e-05	0.437217	0.239181	0.557383	0.34471	0.181972	0.125837
0.180663	0.315396		0.176993	0.343706	0.252899	0.000435533	0.435635	0.500769	0.17486	0.170511	0.132736	0.754843	0.450514	0.999977	0.0871765	0.61928	0.299141
0.622433	0.169964		0.366013	0.857455	0.0229447	0.821433	0.665241	0.643569	0.172391	0.691402	1.63235e-05	0.389462	0.286538	0.999991	0.336049	0.626793	0.286893
0.369069	0.0876319		0.469507	0.801673	0.0497362	0.0266482	6.36656e-06	0.538642	0.282292	0.000587136	0.169591	0.448178	0.481232	0.801057	0.120311	0.225929	0.366495
0.279089	0.226597		0.0561176	0.833721	0.0374759	0.982239	0.0047844	0.643893	0.231823	0.32946	0.343489	0.476604	0.267253	0.997579	0.0181271	0.394019	0.339573
0.351022	0.048229		0.0741817	0.445704	0.228176	0.000202539	2.46421e-05	0.246101	0.342981	0.0731948	0.319958	0.407644	0.323875	0.461784	0.405882	0.0538876	0.470417
0.738873	0.221827		0.105207	0.567465	0.0242934	0.0558227	0.0137882	0.517064	0.00769256	0.997852	0.415871	0.523098	0.237555	0.893135	0.00468361	0.23435	0.494649
0.336763	0.337401		0.165402	0.476309	0.143539	0.999969	3.67269e-05	0.501084	0.48554	0.504335	0.117805	0.490796	0.0418441	0.34611	0.0168517	0.0835997	0.467035
0.273978	0.158719		0.28627	0.526649	2.69825e-05	7.82966e-06	0.748654	0.602726	0.492308	0.120504	0.0945092	0.65802	0.479772	0.895681	0.247576	0.472506	0.203624
0.492396	0.373678		0.146867	0.657626	0.201011	0.991426	5.92043e-07	0.366861	0.156452	0.154708	0.427329	0.456824	0.251903	0.99861	2.61431e-05	0.19279	0.329396
0.463555	0.0604824		0.353996	0.601033	0.0448339	1.23284e-06	0.0110331	0.438539	0.29074	0.616692	2.7079e-06	0.587925	0.366842	0.00750395	0.0755846	0.0734335	0.373678
0.512384	0.0555785		0.0185607	0.21088	0.108426	3.55793e-05	2.92211e-06	0.395675	0.343376	0.889686	0.0883639	0.861478	0.149553	0.153014	0.00170469	0.00570808	0.144527
0.583325	0.258174		0.354083	0.643339	0.019685	0.000208322	0.00250515	0.511703	0.365499	0.0302895	0.000406828	0.52727	0.45233	0.124426	0.286397	0.71487	0.291388
0.315414	0.253835		0.120697	0.370265	0.019619	0.0526846	0.0901892	0.513032	0.425144	0.385325	0.0838472	0.673904	0.0774175	0.171239	0.00271028	0.458741	0.110821
0.463516	0.325725		0.290186	0.586385	0.0872278	0.00118578	0.00103801	0.732061	0.360033	0.000741299	0.119455	0.336531	0.312467	0.639205	0.537513	0.0525571	0.12026
0.41261	0.170327		0.37125	0.988055	0.203774	0.000469077	2.87381e-06	0.560149	0.328559	0.0602714	0.416774	0.440135	0.451493	0.0606052	0.220539	0.379436	0.360221
0.283686	0.23202		0.378373	0.610944	0.239815	0.00583429	0.000117135	0.77547	0.404128	0.58992	7.82049e-05	0.613851	0.229189	0.409369	0.315135	0.477327	0.274524
0.285423	0.417378		0.540535	0.794351	0.305485	0.00171925	1.16513e-05	0.38361	0.281171	0.255948	0.234652	0.485484	0.307463	0.0877453	0.0102803	0.252848	0.159174
0.644342	0.35176		0.379276	0.555888	0.244348	0.121909	0.863873	0.332929	0.494753	0.490693	0.355992	0.438792	0.23162	0.395084	0.180305	0.381648	0.262377
0.21597	0.0546061		0.684069	0.779413	0.240165	0.83968	1.69549e-05	0.256607	0.0175656	0.828377	0.0292312	0.593858	0.113563	0.167818	0.461287	0.581574	0.234703
0.449858	0.364092		0.461303	0.423489	0.105798	0.983402	0.0696598	0.474942	0.513694	0.0445377	0.335306	0.756685	0.396972	0.148039	0.132664	0.572473	0.0958155
0.47917	0.285486		0.326412	0.38575	0.145846	0.908767	0.0281045	0.464588	0.254426	0.312803	0.185251	0.329641	0.354487	0.502505	0.0450212	0.306981	0.063701
0.483239	0.00247834		0.493644	0.272867	0.102266	0.991909	1.92144e-05	0.410795	0.274778	0.00162726	0.0246844	0.651533	0.826077	0.992151	0.0408908	0.316597	0.270888
0.333673	0.260245		0.0674877	0.382237	0.0557289	0.0142505	3.05857e-06	0.353522	0.400631	0.0137373	0.232758	0.616628	0.361239	0.171239	0.000166449	0.0841389	0.256775
0.383861	0.126006		0.275166	0.722945	0.0856664	0.088985	0.000334352	0.464445	0.427519	0.495834	0.390805	0.522154	0.312829	0.198851	0.0694487	0.516434	0.368227
0.473508	0.374737		0.396837	0.660167	0.224195	0.109953	8.93319e-05	0.412767	0.0833279	0.479323	0.308712	0.653983	0.383399	0.191617	0.123194	0.363907	0.238258
0.501183	0.0462874		0.0141932	0.515422	0.307862	0.199288	7.26407e-06	0.427648	0.311535	0.224076	0.0550523	0.484209	0.389356	0.999835	0.00257676	0.225869	0.27244
0.371941	0.187968		0.236687	0.416297	0.236418	0.998118	0.996046	0.598373	0.11795	0.754089	0.0438365	0.621099	0.165516	0.0434689	0.14979	0.522119	0.228109
0.267478	0.30532		0.262939	0.390718	0.0727973	0.996934	9.79054e-05	0.465375	0.0246466	0.000713998	0.232893	0.511286	0.305025	0.804992	0.263704	0.615557	0.278602
0.54021	0.0170549		0.43541	0.221322	0.0289599	1	0.00508728	0.487802	0.371583	0.00846947	0.00719014	0.588752	0.429156	0.0260594	0.213165	0.0908982	0.163318
0.556796	0.188728		0.239147	0.538881	0.25004	4.11257e-05	0.616382	0.523302	0.211041	0.000253768	0.0324794	0.487594	0.283196	0.999951	0.113848	0.645138	0.162197
0.177674	0.223232		0.413556	0.261944	0.152306	0.76905	0.53052	0.373149	0.124731	0.355699	0.0144293	0.370887	0.199443	0.291987	0.0205048	0.257191	0.0913552
0.312925	0.328942		0.164354	0.37537	0.0465919	0.979773	0.000879898	0.407331	0.409543	0.0104719	0.0681772	0.464917	0.438802	0.357641	0.176314	0.309755	0.241608
0.409265	0.328092		0.716566	0.3666	0.520238	2.1759e-05	0.0190567	0.844674	0.411049	0.0055721	0.15587	0.531665	0.478253	0.944641	0.103857	0.359618	0.199632
0.500578	0.484457		0.29107	0.221683	0.0786806	0.709896	0.000737829	0.473443	0.426574	0.353947	4.47263e-07	0.552194	0.352916	0.391754	0.0977639	0.350626	0.0575044
0.454323	0.338		0.113378	0.998563	0.0894592	0.000231495	3.2484e-08	0.477375	0.109342	0.000607133	6.63562e-07	0.50897	0.266029	0.970152	0.189412	0.287467	0.123246
0.699663	0.237268			0.566503	0.0318798	0.999605	0.00436617	0.554994	0.0680298	0.687997	0.070196	0.635097	0.399423	0.300952	0.216683	0.493632	0.23708
0.417731	0.317183			0.347695	0.188257	0.0062855	0.00418397	0.418034	0.307779	0.447622	0.296576	0.50955	0.269199	0.447692	0.0966771	0.14657	0.108058
0.0560382	0.356746			0.474562	0.261227	0.806423	0.000171723	0.457318	0.520661	0.0490875	3.31698e-09	0.696843	0.241554	0.999994	0.0103818	0.323676	0.146344
0.670421	0.18457			0.914303	0.00352167	0.8647	0.0086449	0.483978	0.0105607	0.0509068	0.676883	0.558787	0.324622	0.219481	0.00549941	0.38463	0.0800726
0.350286	0.0864694			0.574678	0.172101	0.00554549	0.0777256	0.495116	0.3386	0.808888	2.74164e-05	0.648112	0.270327	0.208793	0.189946	0.17853	0.40265
0.454126	0.230398			0.14923	0.159473	0.761616	0.00145288	0.447483	0.0125011	0.975884	0.0185571	0.446474	0.328452	0.391781	0.0833028	0.226851	0.177587
0.560463	0.190449			0.0108992	0.193059	0.999748	1.8383e-06	0.528125	0.253615	0.384009	0.215119	0.430313	0.407368	0.291467	2.49046e-05	0.257963	0.0697382
0.443654	0.297			0.500747	0.00227461	0.0293046	0.0807171	0.653232	0.102018	0.35659	0.202585	0.783136	0.168636	0.691532	0.084799	0.266459	0.122951
0.103722	0.163387			0.641353	0.232628	0.997361	0.729489	0.626323	0.671544	0.219936	0.02317	0.498924	0.243447	0.71168	0.000233695	0.395324	0.30528
0.468659	0.236783			0.685965	0.00753696	0.016846	0.00318838	0.427571	0.214618	0.493507	0.00935596	0.520183	0.422592	0.0329108	0.0621465	0.346574	0.460382
0.174691	0.0069027			0.674283	0.0327023	0.998627	5.07632e-06	0.342941	0.253404	0.628637	4.82198e-05	0.525907	0.336628	0.0562947	0.0773268	0.181214	0.14133
0.909342	0.327744			0.32297	0.0988772	0.999865	1.64747e-06	0.605987	0.432985	0.00337919	0.00385626	0.447731	0.242548	0.966846	0.000110878	0.658187	0.190051
0.361212	0.282355			0.496011	0.0220555	7.28214e-06	0.000112571	0.772103	0.448849	0.57877	0.000225316	0.405576	0.308939	0.00672247	3.63649e-05	0.193107	0.298026
0.337412	0.196655			0.396569	0.184576	0.886186	0.740505	0.72152	0.270151	0.383723	0.38095	0.59832	0.270155	0.394577	0.104432	0.791211	0.257796
0.2371	0.516799			0.501848	0.10418	0.966164	0.0110479	0.37739	0.152878	0.417525	0.331028	0.544295	0.366233	0.215626	0.0788961	0.400829	0.49423
0.261991	0.194481			0.436993	0.0451487	0.961354	2.70979e-05	0.255981	0.48994	0.887044	0.352763	0.60708	0.367435	0.155245	8.94107e-06	0.488033	0.13359
0.429515	0.0213674			0.210562	0.0340227	0.930802	0.452462	0.391231	0.398048	0.618012	0.024164	0.437774	0.379253	0.00886143	0.0917552	0.561326	0.283086
0.582322	0.0347351			0.508279	0.0398311	0.999677	3.496e-06	0.887242	0.0345887	0.355528	0.929775	0.471646	0.317932	0.0135347	0.0958705	0.0232796	0.0946431
0.402687	0.197677			0.452531	0.116027	0.0160251	0.000253475	0.566747	0.336747	0.712441	0.0606257	0.580698	0.216366	0.990502	7.21584e-05	0.286691	0.275107
0.481214	0.264476			0.705872	0.0815676	0.999884	0.0767944	0.473902	0.295844	0.449916	0.231519	0.634263	0.25565	0.363883	0.00315973	0.0414404	0.0653099
0.540713	0.106338			0.352418	0.17517	0.529488	0.326859	0.554194	0.159867	0.581557	0.477096	0.420646	0.228895	0.0661756	0.124209	0.548885	0.432032
0.293278	0.0822077			0.718641	0.114573	2.7187e-07	1.51117e-08	0.430308	0.389152	0.46811	0.400162	0.489603	0.438571	0.478352	0.246407	0.0357164	0.284015
0.371757	0.126526			0.406847	0.114367	0.366528	0.000103411	0.498604	0.449273	0.362745	0.288229	0.508154	0.240562	0.376453	0.0717556	0.730329	0.169135
0.475624	0.334822			0.818764	0.312227	0.999999	1.12137e-07	0.632847	0.289758	0.483649	0.00101841	0.461164	0.225437	0.651975	0.303004	0.235092	0.273163
0.359264	0.272754			0.300039	0.136389	0.994805	0.843407	0.546189	0.401272	0.0207497	0.00406005	0.519257	0.341154	0.421	9.41637e-06	0.0815945	0.329059
0.159043	0.0751236			0.579254	0.116255	0.0121473	1.06391e-06	0.542397	0.428217	0.98398	0.446528	0.4939	0.0844515	0.749427	0.0695897	0.478693	0.120661
0.462146	0.496522			0.404769	0.416326	0.999975	0.0587748	0.521581	0.506833	0.488433	0.33844	0.494866	0.233676	0.260996	0.236719	0.174978	0.353254
0.85994	0.235904			0.464667	0.182249	1	0.0120859	0.589663	0.394495	0.999989	0.225528	0.520135	0.386032	0.659921	3.39751e-06	0.219745	0.431832
0.343217	0.309035			0.734553	0.317599	0.948595	0.382842	0.423151	0.404368	0.85285	0.962309	0.443963	0.212452	0.981659	0.786372	0.381447	0.313049
0.881092	0.504444			0.74532	0.164957	0.567623	0.646578	0.551354	0.313845	0.753322	1.98147e-06	0.529415	0.487219	0.762698	1.60873e-05	0.182342	0.389107
0.242038	0.0252495			0.416144	0.128162	0.773288	0.0939548	0.432047	0.475386	0.000709748	0.000788749	0.416532	0.48898	0.25941	0.476813	0.0880197	0.220152
0.771139	0.336233			0.352517	0.306119	0.90414	0.00762605	0.634504	0.323176	1	0.00744616	0.472192	0.253198	0.997574	0.230095	0.442902	0.356103
0.601495	0.436501			0.492213	0.0187359	0.49559	0.046207	0.383938	0.487955	0.413707	0.13468	0.673147	0.202146	0.554398	0.116016	0.0453556	0.263479
0.596027	0.221563			0.552665	0.0776131	0.0383404	0.000187723	0.442622	0.559185	0.0353028	0.273284	0.588027	0.471327	0.424007	0.0338506	0.397688	0.055237
0.368953	0.314875			0.856521	0.00440465	0.108927	0.000562063	0.837029	0.199792	0.330724	0.0335585	0.481057	0.26691	0.183679	0.0190235	0.420864	0.232471
0.419272	0.175486			0.048679	0.259704	0.988782	3.50843e-07	0.376158	0.493788	0.941632	0.570319	0.475795	0.392731	0.9975	0.0129696	0.517517	0.340468
0.414479	0.22704			0.482992	0.0178968	2.5829e-05	0.00658088	0.191726	0.304358	0.419659	0.277656	0.281633	0.37867	0.587299	0.39746	0.443376	0.0572529
0.453853	0.326706			0.957452	0.126604	0.000506829	0.551103	0.419002	0.0768982	0.787773	0.077835	0.647682	0.167088	0.334802	0.0680486	0.0273129	0.186169
0.475141	0.227406			0.318331	0.118658	0.0445044	0.000323795	0.272349	0.344855	0.302733	0.180139	0.486215	0.488666	0.199573	0.356366	0.475007	0.498926
0.922758	0.230245			0.669636	0.00340583	6.04215e-05	1.3041e-07	0.316021	0.365956	0.631681	0.040423	0.562741	0.450372	0.0492618	0.437646	0.359342	0.262938
0.369488	0.119481			0.577333	0.0551747	0.756789	6.61503e-08	0.0529218	0.391919	0.909751	0.245565	0.553598	0.251886	0.477742	0.0160109	0.522508	0.112785
0.623941	0.0751792			0.32697	0.0913206	0.00960081	0.0774618	0.371785	0.0581052	0.208112	0.53129	0.567356	0.524935	0.960053	0.141485	0.259182	0.11365
0.127976	0.359474			0.915706	0.37577	0.999806	0.0239692	0.546108	0.320639	0.668344	3.03122e-05	0.483189	0.458067	0.81281	0.00770761	0.297666	0.30752
0.222322	0.103014			0.432748	0.397486	0.385469	5.52564e-06	0.542586	0.331483	0.551841	1.11741e-05	0.381731	0.183008	0.0590509	0.167685	0.346687	0.228686
0.286734	0.139846			0.186993	0.0656706	0.993158	1.09855e-05	0.511577	0.218273	0.0107617	0.0330119	0.42131	0.0817292	0.999572	0.276774	0.280361	0.60504
0.61202	0.233387			0.515797	0.0488531	0.981917	1.91603e-05	0.32998	0.132317	0.180009	0.000255304	0.26838	0.358408	0.0984826	0.0509444	0.271428	0.155444
0.672614	0.0986384			0.50529	0.165155	0.180169	0.00418213	0.421339	0.251149	0.0893692	0.134245	0.343157	0.365011	0.589953	0.00162887	0.651324	0.385172
0.355762	0.373563			0.484253	0.0357252	5.04218e-05	0.0013007	0.554721	0.173609	0.538997	0.0223213	0.394776	0.31178	0.994983	0.141025	0.502682	0.279181
0.368735	0.33442			0.962404	0.381564	0.00121544	0.173829	0.265754	0.0884503	0.671208	0.00291713	0.508242	0.471187	0.717368	0.0475073	0.299637	0.192855
0.318073	0.211826			0.141922	0.0887042	0.988994	5.695e-05	0.431866	0.327816	0.815543	0.086554	0.495776	0.333216	0.225317	0.248994	0.416061	0.263788
0.790728	0.226461			0.99572	0.346968	0.000138139	0.000253492	0.943244	0.245938	0.0470639	0.00875322	0.573496	0.4809	0.0168016	0.142894	0.113118	0.182344
0.47917	0.121675			0.360745	0.177392	0.000193222	0.0024826	0.505077	0.560509	0.0692013	0.0915395	0.533067	0.285311	0.144347	0.126781	0.35631	0.372951
0.403031	0.123512			0.953344	0.223559	0.991578	0.00286612	0.23481	0.425548	0.086604	0.073744	0.304204	0.339243	0.589601	0.395754	0.383171	0.168993
0.50694	0.101768			0.273912	0.151371	0.99978	4.81773e-05	0.405923	0.343275	0.511502	0.00127649	0.836426	0.394577	0.755973	0.301946	0.713704	0.233884
0.611433	0.348997			0.916386	0.337506	0.0105913	0.00584723	0.352637	0.420973	9.62941e-05	0.237569	0.47429	0.3262	0.010808	0.757185	0.740436	0.236378
0.762104	0.0452883			0.619643	0.00107618	0.991608	0.31893	0.977011	0.539673	0.442505	0.000276864	0.464164	0.401235	0.556404	0.0578281	0.605032	0.226799
0.781516	0.272013			0.402495	0.0228825	0.988921	0.00120286	0.509356	0.144651	0.384372	0.525189	0.485388	0.140918	0.0486498	0.240539	0.18936	0.241634
0.846846	0.0688187			0.77238	0.179671	0.272744	9.77181e-06	0.193747	0.269844	0.275199	0.535074	0.375151	0.401464	0.023821	0.0001105	0.303878	0.260189
0.403414	0.104451			0.384169	0.181468	0.000150442	0.0250225	0.539455	0.51741	0.595926	0.0760233	0.575803	0.469163	0.530703	0.248372	0.0368634	0.0713688
0.288847	0.0157114			0.794901	0.00256352	0.879606	0.295287	0.428083	0.313907	0.938589	0.256259	0.660656	0.525904	0.275042	4.26045e-06	0.0295669	0.279512
0.355071	0.0371711			0.44841	0.135697	0.998773	0.00962033	0.487802	0.394776	0.00724755	0.251117	0.460168	0.312847	0.988545	0.369014	0.152516	0.286585
0.43892	0.128119			0.612689	0.00523543	0.999155	0.0415856	0.695114	0.404574	0.580684	0.50281	0.50599	0.401225	0.0653212	0.0682302	0.258241	0.349523
0.345791	0.365012			0.11733	0.077563	0.0077047	0.000142529	0.485656	0.284196	0.81002	0.0793428	0.788988	0.204756	0.414506	0.00743463	0.329582	0.157816
0.401581	0.110845			0.282803	0.337163	0.0116158	0.0196228	0.333605	0.340948	0.594337	0.479093	0.702123	0.402497	0.999221	3.27344e-05	0.460158	0.334001
0.556327	0.22028			0.613937	0.137438	0.126225	0.831073	0.624009	0.373375	0.267112	6.51219e-05	0.502139	0.337495	0.578859	0.00631821	0.295769	0.294063
0.819755	0.107856			0.29894	0.0677374	0.000111727	0.305017	0.516759	0.32939	0.613227	0.0399282	0.659415	0.247171	0.0455763	0.0694903	0.281495	0.269585
0.583323	0.260787			0.307563	0.0418781	0.445544	1.19924e-06	0.295106	0.488913	0.00539941	0.0023838	0.443993	0.427689	0.260072	0.259745	0.079951	0.0977449
0.261572	0.127627			0.724985	0.00680035	1.23041e-06	3.09317e-05	0.800857	0.435789	0.0462478	0.221963	0.627975	0.425965	0.813425	0.159215	0.394396	0.419322
0.500936	0.0793315			0.27337	0.13334	0.811531	0.00990786	0.432474	0.287209	0.453312	0.623196	0.457801	0.23821	0.925391	0.00171675	0.0760145	0.16093
0.589673	0.205156			0.40516	0.0515239	0.592942	0.804099	0.371012	0.395498	0.364372	0.239306	0.456822	0.393312	0.481367	0.122155	0.32164	0.470009
0.763017	0.118455			0.572981	0.038784	0.963355	0.000372369	0.439667	0.17098	0.197302	0.000549754	0.421506	0.0907638	0.0176834	0.166463	0.14251	0.690448
0.823432	0.288421			0.385386	0.149835	0.786608	1.58413e-07	0.293426	0.439258	0.400824	0.331938	0.468909	0.386973	0.704444	0.24745	0.0872838	0.241759
0.527452	0.173055			0.54361	0.221595	0.94543	0.0136864	0.552433	0.000441374	0.0016464	0.0195651	0.469854	0.717529	0.942876	0.0119772	0.235279	0.360809
0.684448	0.295382			0.0284042	0.091823	0.000390952	3.40699e-07	0.343412	0.436618	0.73043	0.133159	0.707265	0.130758	0.440291	0.00184412	0.292369	0.235467
0.338314	0.378746			0.145512	0.0804466	0.999422	3.14352e-05	0.620145	0.48934	0.354592	5.82202e-06	0.476601	0.173909	0.251207	0.0279751	0.0357726	0.201177
0.408748	0.119295			0.645314	0.131658	0.998798	0.000612014	0.465664	0.258867	0.000668458	0.251343	0.423921	0.363915	0.259111	0.195763	0.172577	0.274579
0.402827	0.148136			0.67726	0.00154476	0.999866	1.2384e-05	0.427672	0.452034	0.0923771	0.0360912	0.424674	0.277521	0.121092	0.341625	0.12012	0.381649
0.540617	0.280401			0.39111	0.139145	0.000133695	1.64139e-06	0.443297	0.403963	0.0844383	0.343683	0.469523	0.197919	0.900067	0.0480045	0.233026	0.249267
0.468281	0.249756			0.256937	0.0309441	0.999766	2.41542e-07	0.455885	0.364352	0.539685	0.33738	0.380565	0.250971	0.482445	0.0221193	0.635696	0.536195
0.711225	0.0970411			0.716628	0.0903484	0.933839	0.951565	0.284095	0.173339	0.998017	0.00266757	0.675119	0.462557	0.910969	0.0517171	0.294027	0.547638
0.655823	0.456541			0.735962	0.211196	0.950676	0.0312405	0.164588	0.297155	0.565315	0.070196	0.335363	0.416041	0.0865559	0.00190012	0.171045	0.0969159
0.328628	0.113721			0.804553	0.101755	0.98406	0.00282503	0.52903	0.244272	0.0459871	0.065874	0.574698	0.334276	0.292949	0.0522985	0.429115	0.153784
0.647925	0.21479			0.711113	0.00882686	0.986406	0.497229	0.365097	0.407898	0.980156	0.0577576	0.584549	0.42638	0.0358783	0.0186731	0.0941635	0.135721
0.134267	0.374081			0.0425537	0.0351379	0.00120472	0.571873	0.479209	0.116883	0.836236	0.0311591	0.441474	0.282688	0.979618	0.182131	0.0235228	0.406501
0.460832	0.613705			0.782241	0.14114	0.971967	6.48268e-05	0.307366	0.317149	0.781592	0.00104179	0.461602	0.323937	0.12251	0.0849408	0.34268	0.139132
0.269946	0.0563376			0.609512	0.000333959	0.000123668	0.000348696	0.420088	0.320261	0.0985582	0.0710871	0.470316	0.386475	0.381951	0.00570765	0.108862	0.164691
0.748159	0.274083			0.335533	0.0493909	5.02366e-05	0.329955	0.997565	0.324065	0.399463	0.438869	0.492121	0.388735	0.234863	0.0405994	0.290279	0.280087
0.420958	0.0986792			0.487319	0.117159	0.999721	0.0105337	0.58498	0.439117	0.764635	0.112536	0.408194	0.237562	0.162437	0.139597	0.0976074	0.338326
0.346772	0.183287			0.681677	0.216987	1.3083e-05	0.0314774	0.602361	0.424715	0.0111806	0.0515751	0.360668	0.251596	0.00176591	0.215485	0.336668	0.347121
0.615222	0.148077			0.746292	0.105601	0.998206	0.00606323	0.479826	0.347438	0.0221136	0.324724	0.474989	0.0631969	0.995257	0.012277	0.167682	0.193133
0.481709	0.337589			0.914943	0.432786	0.00299129	0.00866589	0.416389	0.437738	0.621238	0.0323033	0.450171	0.415244	0.880876	0.0958115	0.59063	0.147673
0.55887	0.130435			0.214788	0.00177205	0.0877641	0.00113821	0.358733	0.424763	0.82395	0.196942	0.505908	0.225655	0.993344	0.161432	0.625283	0.269199
0.399435	0.220369			0.592143	0.200393	0.992758	1.24713e-06	0.619381	0.16435	0.00484035	0.0314154	0.40205	0.277478	0.189544	0.047569	0.355807	0.411124
0.362944	0.24867			0.359049	0.376277	0.00459816	4.03126e-05	0.338628	0.251591	0.459918	0.163755	0.453054	0.362577	0.478414	8.75943e-06	0.0802878	0.249794
0.329062	0.226462			0.554587	0.0010364	0.992204	0.012129	0.77312	0.255246	0.380075	0.472153	0.496175	0.370339	0.937963	0.145942	0.412247	0.108989
0.875705	0.174885			0.573689	0.176881	0.999189	4.22821e-05	0.286361	0.195457	0.634673	8.47043e-06	0.611538	0.127951	0.581618	0.0385761	0.0447351	0.316044
0.32855	0.0672665			0.360062	0.123828	0.999066	0.00148098	0.101485	0.457938	0.261422	0.30839	0.456648	0.402348	0.568261	0.0980235	0.372272	0.282113
0.69908	0.0322806			0.982489	0.0711787	0.989928	0.00410553	0.267629	0.249542	0.461457	0.116395	0.4647	0.155377	0.128154	0.168909	0.238518	0.262751
0.39625	0.182253			0.518511	0.0574409	0.000285628	1.3102e-05	0.607599	0.246399	0.388196	0.233722	0.385192	0.461899	0.542982	0.241489	0.137948	0.317123
0.476506	0.0771213			0.27619	0.0676751	0.988046	0.00155917	0.405744	0.292114	0.0187851	0.270676	0.701935	0.321918	0.564695	0.0616468	0.384085	0.426104
0.335131	0.253661			0.528257	0.046943	0.197033	0.115562	0.475875	0.412281	0.0567374	0.203477	0.408786	0.234646	0.971205	4.26045e-06	0.0832355	0.100745
0.439532	0.0870984			0.355736	0.144226	0.131595	0.817175	0.405307	0.328594	0.330253	0.00745713	0.518747	0.341265	0.44267	0.0358902	0.159739	0.350824
0.844806	0.430436			0.665404	0.323476	0.27534	0.0186483	0.260108	0.411571	0.978229	0.00258362	0.576102	0.390609	0.363137	0.0516556	0.346805	0.343517
0.857185	0.0455806			0.150132	0.0459733	0.999981	0.621304	0.512777	0.136525	0.785631	0.117873	0.674511	0.373328	0.70744	0.0444503	0.315726	0.0413401
0.22687	0.296633			0.990556	0.191597	0.00249917	8.41789e-07	0.466269	0.481545	0.635093	0.329344	0.5076	0.46258	0.23674	0.407258	0.157101	0.443643
0.887231	0.257769			0.270592	1.91197e-05	0.999936	2.09413e-06	0.95566	0.225341	0.373494	0.334114	0.476649	0.263174	0.492405	0.436696	0.8607	0.339053
0.459016	0.379548			0.125087	0.447759	6.87722e-05	0.0597857	0.546065	0.142846	0.711385	0.0207815	0.390071	0.469113	0.943098	0.0549125	0.356772	0.289131
0.705068	0.198741			0.809252	0.494995	0.0777261	0.000287684	0.554268	0.457069	0.908987	0.0318548	0.616219	0.373371	0.973038	0.0102563	0.548091	0.404215
0.410406	0.503161			0.156394	0.128953	0.0142462	0.000759065	0.500262	0.408695	0.273769	0.37006	0.589251	0.376613	0.0343989	0.0601137	0.425327	0.288119
0.389494	0.371061			0.416126	0.0837929	0.997468	0.91997	0.194442	0.293199	0.248009	0.00365201	0.445097	0.198447	0.838088	0.0811799	0.344422	0.296883
0.498218	0.259551			0.409246	0.226542	1	0.835575	0.685447	0.156735	0.00418444	0.0927659	0.219337	0.4281	0.0332491	0.108659	0.40975	0.390179
0.527338	0.137782			0.451874	0.0581008	0.95269	0.0130077	0.46989	0.231237	0.109637	0.0516116	0.486953	0.336225	0.0641055	0.148236	0.190162	0.433921
0.586792	0.0216212			0.34959	0.0766302	0.9542	0.157282	0.531478	0.368632	0.161404	0.109815	0.434795	0.36641	0.994678	0.0171592	0.0442628	0.390984
0.165472	0.156138			0.688487	0.300174	0.997419	0.0489791	0.330298	0.353364	0.567709	0.295178	0.482515	0.152923	0.700526	0.0273886	0.269619	0.394243
0.482024	0.642827			0.383469	0.428526	1	0.0171978	0.518979	0.313503	0.157103	0.00411984	0.21613	0.374642	0.034921	0.0184639	0.0916228	0.275756
0.539257	0.183577			0.208308	0.0738525	0.996831	3.33108e-06	0.536524	0.192839	0.00681327	0.510704	0.679594	0.452685	0.629464	0.34125	0.444602	0.165249
0.433174	0.064713			0.0617714	0.0408799	0.814583	0.469377	0.502525	0.233877	0.412757	0.109549	0.730148	0.280125	0.575373	0.188938	0.381117	0.416738
0.800365	0.461224			0.591655	0.662845	0.998911	8.09519e-07	0.496516	0.616215	0.703368	0.0237549	0.69285	0.180819	0.342327	3.5868e-06	0.181481	0.103744
0.672775	0.168374			0.396977	0.0508689	0.750497	4.95676e-05	0.446178	0.088353	0.000349626	0.399858	0.474822	0.32622	0.224121	0.0694387	0.271865	0.255102
0.74984	0.169074			0.928095	0.0104293	0.692299	2.91991e-06	0.305499	0.212406	0.294354	2.88173e-05	0.36857	0.409116	0.476178	0.000505169	0.512516	0.423106
0.520469	0.34561			0.726537	0.231061	4.20378e-06	0.154172	0.423518	0.297155	0.533436	0.771356	0.482363	0.411425	0.309871	0.0978567	0.636598	0.398444
0.345469	0.0055626			0.958786	0.0678245	0.339236	0.995191	0.551146	0.412464	0.524549	0.00588274	0.483255	0.309054	0.94501	0.0124183	0.237558	0.115444
0.364829	0.152014			0.399873	0.00781388	0.993179	7.0648e-05	0.527886	0.280011	0.655798	0.179493	0.33914	0.3315	0.999723	0.0305668	0.0599339	0.156169
0.270585	0.533627			0.959836	0.460701	0.958997	0.000622202	0.674789	0.430438	0.00121968	0.0380337	0.521742	0.129624	0.447505	0.132133	0.283833	0.266678
0.522044	0.520969			0.715016	0.000359337	0.796816	0.000143832	0.998423	0.00335467	0.741437	0.425105	0.417223	0.397548	0.894234	0.00577421	0.300582	0.296063
0.409836	0.104284			0.625512	0.191811	0.99988	3.07757e-05	0.5832	0.411079	0.282983	0.260044	0.464006	0.585798	0.993608	0.27931	0.175942	0.491008
0.644228	0.256997			0.395814	0.109621	0.939823	0.00385903	0.598694	0.354201	0.158622	0.00542288	0.898615	0.382316	0.651799	0.0492418	0.531038	0.411618
0.548335	0.36245			0.483625	0.011615	0.00054258	0.0163354	0.973227	0.0131171	0.669702	0.0115417	0.477808	0.128727	0.714792	0.0124339	0.0872749	0.232328
0.387296	0.0325007			0.686425	0.18085	0.016448	0.004245	0.932163	0.340455	0.00690099	0.312071	0.437818	0.252456	0.985163	0.152022	0.699787	0.0529035
0.323682	0.203089			0.668054	0.310661	0.993467	0.00199514	0.364912	0.0837978	0.303418	0.224422	0.521166	0.209412	0.739299	0.00465779	0.187097	0.0490185
0.361723	0.0898936			0.680573	0.0401976	0.670438	3.57677e-05	0.552357	0.147888	0.996994	0.0492147	0.622371	0.38764	0.21902	0.0649538	0.37389	0.268095
0.375675	0.262922			0.284485	0.0602231	0.250141	0.0776739	0.62572	0.251866	0.0126713	0.0012439	0.30219	0.272393	0.572479	0.0643094	0.438982	0.383655
0.145142	0.236098			0.718344	0.0137085	0.00154778	0.0168427	0.37481	0.361426	0.085711	0.0574382	0.456822	0.425952	0.358689	0.224898	0.159657	0.303553
0.252272	0.0974271			0.737061	0.0202473	0.0155441	7.97533e-05	0.229969	0.475645	0.27782	0.121531	0.770482	0.368761	0.985159	0.239974	0.23323	0.745306
0.0361867	0.130232			0.439907	0.312548	0.00106	0.0134048	0.459916	0.88256	0.460253	0.0312547	0.396802	0.459747	0.0260594	0.128671	0.358132	0.15742
0.5484	0.523036			0.551546	0.0862733	0.0555271	0.00106385	0.356729	0.117151	0.0145184	0.0133503	0.400319	0.113659	0.0749462	1.03769e-05	0.353497	0.143245
0.327751	0.0468436			0.54368	0.35947	0.28053	0.0117395	0.712848	0.478357	0.624512	0.460349	0.579629	0.140539	0.0473669	0.0244048	0.158298	0.116313
0.527127	0.0450132			0.496711	0.204743	1.52407e-08	6.0096e-05	0.469123	0.410316	0.0667947	0.325353	0.582272	0.119229	0.0727918	0.00379219	0.73649	0.373901
0.185022	0.386768			0.636224	0.0820129	0.000279442	0.897258	0.537259	0.38163	0.625913	0.0606257	0.424692	0.395943	0.208793	0.290611	0.331987	0.137312
0.555428	0.034586			0.338669	0.000509791	0.0128953	3.48512e-07	0.862817	0.0276437	0.341542	0.254869	0.594725	0.209053	0.157623	0.136637	0.452592	0.206225
0.770697	0.329317			0.381755	0.000791934	0.108934	0.0586444	0.702253	0.438565	0.727847	0.0829926	0.56605	0.288106	0.885181	0.238897	0.0928422	0.384699
0.545654	0.301167			0.142668	0.303323	0.0097195	0.0508223	0.557187	0.28975	0.9989	0.000643601	0.641988	0.370638	0.372982	0.00327656	0.480278	0.0723337
0.661344	0.247728			0.498869	0.160594	0.00173052	0.00749884	0.47653	0.326286	0.108187	0.00157976	0.444548	0.506014	0.936729	0.254011	0.354879	0.288802
0.627192	0.185559			0.057102	0.487691	2.3425e-05	0.32601	0.095433	0.440426	0.513701	8.66344e-07	0.502159	0.447219	0.999987	0.222961	0.346427	0.288035
0.498313	0.26833			0.775977	0.0986824	0.852843	0.899914	0.436108	0.204952	0.892416	0.195476	0.699959	0.346166	0.366976	0.0210847	0.298267	0.271184
0.46981	0.269286			0.395853	0.0492885	0.0747568	0.000515942	0.364821	0.219257	0.841244	0.345276	0.706395	0.378498	0.325927	0.264654	0.130158	0.169525
0.531027	0.201951			0.457265	0.0621667	0.999263	0.000884258	0.329685	0.530839	0.00873983	0.0518703	0.551564	0.464821	1	0.0452427	0.0872958	0.151034
0.0338142	0.307481			0.409635	0.380755	0.00460332	0.00809244	0.553768	0.350609	0.00687373	6.02824e-05	0.278285	0.426661	0.137119	0.00138393	0.574465	0.144085
0.245314	0.378442			0.720248	0.00240413	0.00114838	0.000161132	0.598796	0.0775296	0.731685	0.000533494	0.496547	0.323609	0.0675006	0.0461527	0.425526	0.29944
0.497001	0.0164833			0.11124	0.098959	0.957658	0.00144842	0.804975	0.377988	0.405514	0.417071	0.561835	0.420797	0.937244	0.0416752	0.106042	0.111093
0.485625	0.224893			0.282187	0.246695	8.38171e-05	0.000384219	0.662617	0.327786	0.659508	0.0917242	0.567178	0.344254	0.279757	0.201264	0.179133	0.559761
0.587327	0.24408			0.581441	0.0433496	0.990707	0.915369	0.275645	0.280431	0.414548	0.0239927	0.475202	0.399678	0.549137	0.106572	0.245861	0.359698
0.433317	0.00984316			0.384586	0.391573	0.123518	0.411789	0.432975	0.4133	0.0458621	0.0989451	0.509905	0.110379	0.112941	0.000750577	0.728151	0.394398
0.339845	0.212972			0.483736	0.149852	0.911711	0.357807	0.324439	0.45268	0.989173	5.62465e-05	0.340018	0.124472	0.053821	0.000768316	0.593268	0.500758
0.558663	0.441216			0.184236	0.194214	0.000820392	0.0205387	0.430049	0.247614	0.827226	0.096486	0.470433	0.127734	0.292206	0.3431	0.316637	0.0717455
0.361218	0.0748053			0.429872	0.272908	8.64632e-05	0.001447	0.321045	0.00152527	0.053647	0.144288	0.276317	0.261491	0.904974	0.0429524	0.314361	0.202265
0.378737	0.165091			0.601624	0.00200737	0.00100273	0.00022112	0.620322	0.0336097	0.586571	1.86665e-07	0.511486	0.37764	0.615873	0.184795	0.130115	0.318425
0.54449	0.434587			0.667712	0.00195409	0.9579	3.70478e-06	0.482606	0.26267	0.443689	0.272943	0.328412	0.16115	0.180944	0.0769472	0.169737	0.33781
0.675678	0.261159			0.650758	0.0622965	0.00229214	1.18044e-08	0.111591	0.137062	0.0405352	0.29202	0.689124	0.29212	0.264435	0.179921	0.380291	0.369817
0.483623	0.784619			0.987266	0.0633976	0.999238	0.000553838	0.535271	0.29193	0.0157362	0.357492	0.492956	0.44866	0.615137	0.0892497	0.792221	0.592483
0.727768	0.172703			0.403531	0.0304326	0.038986	0.107413	0.408948	0.413741	0.0393356	0.364102	0.463757	0.399767	0.343201	0.0898233	0.223047	0.353487
0.290453	0.114886			0.730008	0.0114939	0.176892	1.05646e-07	0.982201	0.207637	0.292732	0.00168192	0.382692	0.36373	0.0318095	0.189009	0.50416	0.0648498
0.386224	0.709395			0.782052	0.0274212	0.993677	0.00547922	0.822426	0.505319	0.174622	0.159567	0.55051	0.286998	0.479731	0.0876298	0.23533	0.549292
0.440458	0.422077			0.516726	0.030001	0.0496963	1.22956e-05	0.324381	0.342469	0.423963	0.530739	0.772109	0.31264	0.930306	0.243374	0.105199	0.305161
0.153692	0.321808			0.337721	0.0801539	0.289075	9.36761e-06	0.377963	0.329909	0.056843	0.11008	0.510853	0.194609	0.992545	0.13604	0.380375	0.205663
0.608723	0.122446			0.466251	0.34776	0.00310261	0.000404221	0.389034	0.447834	0.159341	0.218921	0.555966	0.346707	0.999966	0.0153127	0.594434	0.361669
0.492052	0.00367257			0.446673	0.00283292	0.000798957	2.80481e-05	0.66274	0.136701	0.0118018	0.54054	0.580098	0.26897	0.672629	0.278728	0.65221	0.12734
0.369677	0.277407			0.475852	0.120773	0.564763	2.81467e-05	0.517895	0.568367	0.0141464	0.0262418	0.762856	0.390691	0.545931	0.101656	0.116489	0.343053
0.827891	0.155071			0.362061	0.0228232	4.5866e-07	2.76513e-06	0.460804	0.456553	0.51722	0.869723	0.508876	0.317511	0.485195	0.092254	0.542131	0.246477
0.517195	0.0200767			0.549461	0.16058	0.995909	0.386946	0.517072	0.303206	0.961595	0.00236868	0.149185	0.290709	0.590295	0.323182	0.364106	0.34583
0.23565	0.134703			0.680976	0.044222	2.28872e-06	1.93525e-05	0.186827	0.282541	0.542626	0.00344982	0.423019	0.280035	0.200017	0.217105	0.239892	0.138101
0.227729	0.163936			0.865204	0.0937937	0.0165981	1.09003e-05	0.543173	0.481311	0.498594	0.0021279	0.487139	0.454104	0.119002	0.382794	0.582382	0.42032
0.353603	0.595108			0.122234	0.312748	0.983396	1.13679e-06	0.450514	0.0562653	0.345974	0.00399178	0.406155	0.422965	0.192925	0.0391797	0.0692463	0.290581
0.614424	0.279462			0.399221	0.238372	0.000226402	0.00118939	0.439106	0.0141042	0.0217552	0.0591742	0.527887	0.487496	0.647255	0.127287	0.417187	0.338027
0.462304	0.111787			0.189339	0.281346	0.946393	6.45784e-07	0.585854	0.387481	0.117126	0.289988	0.540703	0.392402	0.554893	0.0305961	0.341263	0.45193
0.0091299	0.200551			0.781426	0.0406432	0.202616	1.00179e-07	0.627172	0.349918	0.0769147	0.220429	0.660366	0.294948	0.35111	6.03387e-05	0.467811	0.547162
0.460174	0.133104			0.829004	0.151889	0.000553397	3.77036e-05	0.482974	0.580486	0.148808	0.311307	0.800117	0.327223	0.962191	0.244808	0.475196	0.271799
0.201097	0.196869			0.527161	0.0944487	0.950486	0.85086	0.487335	0.447462	0.991208	0.0711566	0.465947	0.275689	0.00754432	0.235288	0.248168	0.301104
0.408846	0.220896			0.3273	0.148629	0.996135	0.000359414	0.508712	0.331487	0.0729141	0.375038	0.668318	0.207091	0.56781	0.0154792	0.812861	0.0188822
0.478385	0.10268			0.337406	0.00788311	0.0975489	4.78315e-07	0.630408	0.0124438	0.591538	4.66068e-05	0.720988	0.297367	0.256209	0.0891955	0.307667	0.337773
0.420109	0.268392			0.545918	0.0458642	0.00152897	0.00158772	0.296132	0.341663	0.980128	0.147358	0.85933	0.315036	0.543986	0.209215	0.0180364	0.274808
0.491977	0.376886			0.416003	0.162179	0.95016	0.0287102	0.477769	0.379495	0.432745	0.369107	0.752496	0.525712	0.917799	0.0173476	0.366921	0.218224
0.418761	0.313346			0.485324	0.000580684	0.049861	0.00180026	0.982782	0.377469	0.310657	0.00404797	0.623073	0.339982	0.538834	0.0177001	0.516851	0.3173
0.488046	0.194883			0.687409	0.0152444	0.079835	0.00653544	0.791302	0.134705	0.693741	0.362435	0.623077	0.184026	0.313601	0.137505	0.460176	0.211073
0.43442	0.632131			0.64302	0.0256773	0.59993	0.50715	0.973499	0.266024	0.275341	0.330538	0.550818	0.428116	0.799777	0.0523041	0.2624	0.081018
0.128215	0.0826876			0.343082	0.0835402	0.991491	0.00170341	0.53874	0.277051	0.991555	1.52843e-06	0.607543	0.479018	0.97956	0.219622	0.107826	0.328784
0.731654	0.241449			0.598252	0.0489152	0.998747	3.22993e-06	0.620504	0.322442	0.75472	0.128374	0.540944	0.28342	0.0205434	0.0680244	0.00161637	0.426697
0.288647	0.0844429			0.811111	0.00681159	0.998776	3.65572e-05	0.941438	0.37005	0.349879	3.74955e-05	0.757722	0.484038	0.960511	0.602764	0.468356	0.323601
0.459219	0.118768			0.611236	0.0917188	0.00191151	5.73142e-08	0.599147	0.243741	0.550493	0.121611	0.644725	0.409319	0.568758	0.220319	0.537835	0.41356
0.748541	0.283853			0.0488498	0.126632	0.989121	0.000529848	0.80587	0.161337	0.423396	0.219858	0.349767	0.344917	0.600035	0.00209981	0.463819	0.323651
0.537816	0.17832			0.638839	0.0343213	0.957159	5.58219e-06	0.494646	0.381706	0.0233648	0.064017	0.711715	0.286367	0.0605543	0.00143198	0.352489	0.192019
0.608774	0.0366012			0.364412	0.0498784	0.897245	0.25023	0.497181	0.349759	0.626136	0.136516	0.532592	0.463017	0.765329	0.470552	0.16843	0.143495
0.290177	0.201314			0.414768	0.0392897	0.998977	1.02478e-05	0.474786	0.390113	0.391806	0.00101711	0.664468	0.378416	0.419529	0.262183	0.422335	0.16835
0.589621	0.313628			0.463676	0.0176853	1	0.493516	0.605571	0.344812	1.00859e-05	0.00186862	0.469403	0.26023	0.981992	0.0116363	0.645769	0.224056
0.528178	0.264592			0.261635	0.144745	1.06358e-06	0.317945	0.462361	0.216212	0.694614	0.404688	0.783954	0.678368	0.105477	0.0167961	0.357557	0.458919
0.836232	0.428451			0.475013	0.0736518	0.510237	0.951721	0.171969	0.00711042	0.518249	0.00624224	0.457468	0.386055	0.56142	0.373817	0.167432	0.230033
0.322889	0.458191			0.38986	0.372034	0.000506275	8.26039e-05	0.682498	0.65003	0.734856	0.0481972	0.470563	0.349097	0.368411	0.082342	0.438013	0.377969
0.660954	0.0467205			0.393355	0.00298194	0.573055	0.491303	0.398038	0.237874	0.91402	0.0639571	0.629505	0.272206	0.632286	0.181076	0.28712	0.212148
0.603233	0.131303			0.45634	0.317738	5.65744e-08	0.0572156	0.782203	0.268416	0.333909	0.98874	0.469603	0.378224	0.513881	0.0414974	0.193791	0.162607
0.154677	0.33795			0.888917	0.0862752	0.76676	0.028761	0.684502	0.251508	0.435257	0.0367678	0.356231	0.385739	0.189216	0.716087	0.322045	0.219058
0.319173	0.118878			0.272122	0.160559	0.997932	0.10852	0.249866	0.505566	0.522331	0.326346	0.520434	0.391435	0.348484	0.0477815	0.433799	0.2561
0.25023	0.00347884			0.394436	0.22716	0.996712	6.31878e-06	0.440803	0.336141	0.628562	0.0941168	0.477079	0.342521	0.99899	0.0361939	0.821773	0.332388
0.64007	0.321537			0.634645	0.191818	0.000306669	0.000224478	0.40286	0.30768	8.80151e-05	0.0720137	0.865541	0.422394	0.0181458	0.144501	0.0559152	0.134709
0.507659	0.120652			0.455365	0.332767	0.0339904	1.44498e-07	0.399552	0.181498	0.120949	0.0209012	0.205577	0.213588	0.336478	0.0832318	0.359583	0.216601
0.536836	0.468133			0.418505	0.0318877	0.909522	9.85259e-05	0.534892	0.459824	0.518594	0.000263512	0.486477	0.396025	0.0844714	2.4642e-05	0.605572	0.31744
0.301704	0.000856697			0.338332	0.0327707	0.0281828	9.78368e-06	0.225607	0.212145	0.452741	0.479907	0.697244	0.457876	0.252543	0.274401	0.208996	0.285849
0.531651	0.22657			0.644715	0.0992676	0.715751	0.998973	0.40634	0.238754	0.0180368	0.0162395	0.490689	0.435654	0.0404641	0.00848732	0.263159	0.587564
0.131762	0.108706			0.998963	0.0703056	1.77176e-05	0.00462475	0.472483	0.186895	0.126332	0.0360889	0.487825	0.292641	0.0735598	0.174664	0.176664	0.346508
0.623957	0.262894			0.424881	0.0747537	0.0227063	0.0238662	0.511678	0.25217	0.124998	0.170491	0.552917	0.178126	0.730618	0.0466727	0.286113	0.442194
0.447599	0.226667			0.254786	0.109885	0.000460961	0.00263805	0.517005	0.455983	0.0587309	0.582112	0.343568	0.380529	0.0725681	0.166855	0.0968149	0.246095
0.382589	0.140095			0.531527	0.0319148	0.7957	2.05477e-06	0.499118	0.350404	0.418497	0.0829233	0.51077	0.240712	0.0176834	0.00981998	0.238233	0.326175
0.269009	0.0761618			0.611193	0.114314	0.990904	0.170987	0.523386	0.2893	0.278146	0.0125967	0.55286	0.475954	0.299814	0.0718007	0.176506	0.314007
0.446705	0.0615047			0.573656	0.0665642	0.729269	0.00564005	0.486355	0.314137	1.96674e-05	0.0175986	0.5663	0.393194	0.703245	0.00373425	0.0738366	0.309975
0.589953	0.274893			0.623206	0.00046691	1.01054e-05	3.36551e-08	0.319322	0.000546683	0.00210586	0.370351	0.431052	0.441061	0.202245	0.00324922	0.268479	0.210085
0.445792	0.0254224			0.392849	0.0760026	0.0109147	0.0294278	0.12719	0.235781	0.706526	0.533414	0.510277	0.387188	0.0252971	0.00123291	0.200918	0.203104
0.495207	0.110083			0.917033	0.109284	0.805733	0.196359	0.337172	0.00454641	0.535759	0.361614	0.669423	0.176167	0.541244	0.0170565	0.105098	0.284515
0.87347	0.284856			0.614309	0.0600642	0.00105604	0.000495026	0.424096	0.00511373	1	0.396079	0.280973	0.420283	0.434598	0.483014	0.220372	0.335922
0.524879	0.499938			0.504032	0.0314705	0.984743	0.00127927	0.980494	0.460049	0.165175	0.00463794	0.652435	0.313703	0.321398	0.212545	0.0640604	0.394069
0.544455	0.413912			0.847543	0.154338	0.000622256	8.65699e-06	0.556006	0.161781	0.392052	0.0356119	0.534844	0.307925	0.659734	0.0641767	0.240109	0.295365
0.373661	0.00527569			0.361578	0.280948	0.999563	4.04336e-05	0.452837	0.111427	1	0.36421	0.47004	0.306223	0.00272009	5.38424e-05	0.233804	0.291688
0.603093	0.0111939			0.789983	0.110949	0.00439382	3.91569e-05	0.900646	0.307318	0.450406	0.0829475	0.428101	0.42953	0.99957	0.661016	0.4285	0.0951143
0.424609	0.208132			0.345227	0.097264	0.0119729	0.940356	0.437545	0.334869	0.00483748	7.13807e-06	0.480345	0.699243	0.27914	0.000414258	0.280275	0.381803
0.43714	0.21324			0.467106	0.162837	0.217112	5.63852e-06	0.463778	0.38064	0.465824	0.0533616	0.472304	0.297725	0.999777	0.000263871	0.395779	0.200613
0.513325	0.0078379			0.488585	0.0991614	0.000306007	0.0114299	0.367271	0.355953	0.265118	0.0943261	0.420547	0.174073	0.037591	0.328145	0.223952	0.387135
0.397059	0.451139			0.173477	0.410344	0.724132	3.11329e-06	0.460584	0.443448	0.673663	0.575478	0.45919	0.297423	0.440249	0.109946	0.215138	0.205774
0.403129	0.00395522			0.126555	0.0366437	0.736776	1.05064e-05	0.459825	0.184903	0.734078	0.329517	0.470432	0.233433	0.897642	0.203971	0.219407	0.359449
0.387095	0.333096			0.799645	0.256364	0.999869	0.0117837	0.368366	0.301301	0.881931	0.00420052	0.73572	0.220592	0.81281	1.74387e-07	0.221676	0.0957643
0.709593	0.0362056			0.0890888	0.248188	0.897996	0.335885	0.799435	0.123805	0.446697	0.161375	0.386088	0.0680631	0.0900204	0.000789693	0.14373	0.840452
0.417172	0.385856			0.41313	0.00404864	0.00011298	0.0927571	0.270442	0.139144	0.61672	0.329325	0.559995	0.22368	0.0514049	0.180145	0.074141	0.611348
0.588155	0.132259			0.655097	0.0370067	0.000117175	7.22074e-05	0.341225	0.421792	0.0715216	0.348811	0.446758	0.255882	0.853319	0.0790704	0.166459	0.257776
0.483705	0.00336965			0.772013	0.140856	0.990308	0.843471	0.481528	0.25496	0.662487	0.284403	0.137413	0.22401	0.453639	0.109156	0.168499	0.388571
0.896645	0.11397			0.485639	0.0561733	0.999698	5.79317e-06	0.4613	0.419146	0.0581942	1.3435e-07	0.56988	0.352379	0.752406	0.0522902	0.177214	0.32619
0.72652	0.00731004			0.377355	0.043173	0.898135	1.21904e-07	0.760588	0.421559	0.997997	0.308712	0.68235	0.491699	0.0176834	0.0739388	0.369661	0.250266
0.378131	0.189214			0.431026	0.139971	0.99795	0.231879	0.723087	0.340279	0.261734	0.392624	0.462073	0.422732	0.680995	0.00222613	0.383694	0.393918
0.930002	0.398985			0.319133	0.113587	0.00080949	2.68855e-05	0.579489	0.2551	0.14096	0.264068	0.426157	0.353156	0.720063	0.132099	0.415679	0.323308
0.713285	0.588627			0.360533	0.0648122	0.984074	0.00142208	0.427454	0.517751	0.0308741	0.00248637	0.490599	0.294072	0.989378	0.110992	0.197867	0.196385
0.282443	0.182222			0.421195	0.0135614	0.0055014	0.0647891	0.207861	0.371277	0.38068	0.072159	0.491374	0.334761	0.748713	0.0139092	0.424528	0.331914
0.392674	0.178954			0.928997	0.14503	1.53755e-07	0.00525363	0.636372	0.404342	0.479659	0.059661	0.480585	0.135427	0.922923	0.0886406	0.203482	0.27769
0.30175	0.294947			0.499501	0.0961969	0.00521559	0.14931	0.460123	0.306315	0.442157	0.000261393	0.594253	0.510027	0.986666	0.19147	0.205531	0.623085
0.867017	0.294815			0.348334	0.00142948	0.994451	0.000260737	0.832434	0.240684	0.655448	0.630635	0.404483	0.443751	0.378839	0.0118643	0.0648675	0.51365
0.0658297	0.174534			0.880355	0.0244808	0.0797886	0.978506	0.768782	0.0249812	0.357273	0.476291	0.590494	0.24714	0.266491	0.0514639	0.902903	0.287629
0.620251	0.565489			0.68214	0.174448	0.708484	0.0540223	0.449206	0.404565	0.491282	0.228554	0.706177	0.267556	0.99988	0.0981222	0.39948	0.500807
0.554866	0.43872			0.541138	0.0362705	0.736863	0.0134741	0.388203	0.410813	0.0262282	0.238954	0.574208	0.449109	0.260746	0.048301	0.42994	0.379714
0.375022	0.0059375			0.254785	0.070115	0.676354	0.0367866	0.48845	0.366035	0.00857537	0.000429249	0.486735	0.353789	0.583628	0.280073	0.295804	0.480359
0.673866	0.152686			0.754508	0.19841	0.491585	8.26785e-05	0.303741	0.423736	0.967934	0.69968	0.497662	0.150088	0.413356	0.50895	0.178215	0.451363
0.35392	0.0102652			0.200728	0.320728	0.996366	0.00429909	0.39756	0.318637	0.0348855	0.407925	0.394627	0.384922	0.675753	0.337828	0.536011	0.0920002
0.375648	0.185876			0.104799	0.226766	0.9895	0.521091	0.171352	0.337997	0.620361	0.154465	0.416064	0.172228	0.999999	0.00799301	0.792278	0.321285
0.343138	0.351306			0.353856	0.160269	0.837728	0.871603	0.715694	0.447871	0.0217733	0.280376	0.498552	0.277791	0.999868	1.03974e-05	0.282071	0.12285
0.911639	0.133595			0.368082	0.220245	3.84169e-06	7.74024e-06	0.506748	0.282591	0.209758	0.248285	0.329336	0.242851	0.0733668	0.0205829	0.2035	0.160261
0.338538	0.232821			0.159174	0.0613241	0.989932	4.20528e-05	0.588584	0.327766	0.0526464	0.148661	0.439374	0.167833	0.0521243	0.106467	0.363007	0.26126
0.535182	0.148401			0.448711	0.105195	0.990914	0.0446415	0.247713	0.00152527	0.851702	0.0755312	0.494209	0.0830192	0.179001	0.293705	0.114875	0.535444
0.402522	0.250641			0.157646	0.0350959	0.998632	0.000667614	0.408467	0.184504	0.671636	0.0179021	0.447658	0.160436	0.96108	0.168602	0.309981	0.335094
0.236015	0.265037			0.392496	0.0857438	0.951384	0.0727064	0.827058	0.367481	0.569829	0.182401	0.584983	0.424339	0.822331	0.0937505	0.432023	0.0480313
0.401793	0.189807			0.66278	0.0164959	5.68617e-05	0.0030822	0.42244	0.401168	1	9.21732e-12	0.452011	0.396634	0.239712	0.0598375	0.751476	0.153283
0.330639	0.214355			0.445559	0.340718	1.07745e-07	3.65224e-08	0.572005	0.48019	0.00312197	0.0635483	0.346259	0.237366	0.0943952	0.109285	0.216228	0.31454
0.29855	0.197505			0.350602	0.0872178	0.324233	0.00168877	0.136191	0.42231	0.345784	0.00950388	0.429602	0.312778	0.810294	0.0252138	0.411606	0.574652
0.427901	0.0375047			0.324053	0.0223567	0.999976	3.67708e-05	0.495726	0.395487	0.409632	1.0756e-09	0.494936	0.227562	0.603172	0.0407137	0.259699	0.268873
0.207742	0.313504			0.54149	0.101886	0.862054	1.76098e-05	0.157115	0.463638	0.000291738	0.04053	0.321949	0.204649	0.13886	0.00943582	0.3414	0.126865
0.758368	0.0529538			0.459422	0.110672	1.54663e-05	0.450352	0.827978	1.15652e-05	0.886226	0.00222265	0.515125	0.314248	0.705153	0.146233	0.290944	0.245186
0.649596	0.0324331			0.885736	0.199051	2.51696e-06	0.00151054	0.155952	0.399911	0.0352375	0.369222	0.642025	0.21881	0.654467	0.174775	0.195177	0.212862
0.571703	0.263479			0.42946	0.138264	0.974452	0.617831	0.383027	0.390143	0.436274	0.327398	0.465153	0.15536	0.101481	0.0717328	0.156756	0.216106
0.293617	0.150605			0.0226052	0.0293818	0.306697	0.0495702	0.648583	0.468868	0.957461	0.0039143	0.595734	0.359084	0.167572	0.129033	0.480956	0.159548
0.743501	0.0344228			0.506783	0.111612	2.05788e-07	0.785471	0.534588	0.217468	0.365752	0.345628	0.498302	0.432736	0.993164	0.0937291	0.230681	0.407594
0.406295	0.22801			0.451237	0.312575	0.246693	0.00236227	0.775154	0.454458	0.5915	0.00552597	0.343197	0.4763	0.711347	0.0468892	0.660124	0.273028
0.435536	0.0570244			0.734311	0.104131	0.710964	0.162304	0.887327	0.401971	0.479462	0.405162	0.436841	0.558254	0.846338	0.471793	0.316646	0.212981
0.332975	0.303027			0.425479	0.077781	0.374266	4.92786e-05	0.436061	0.210318	0.755694	0.36769	0.51963	0.338165	0.0814806	0.194119	0.737747	0.187295
0.426428	0.287021			0.0992244	0.0885187	0.000436417	0.00457806	0.556514	0.225129	0.343796	0.206188	0.485466	0.374047	0.483702	4.22318e-06	0.265619	0.379856
0.477168	0.309944			0.542177	0.194203	0.79141	0.783927	0.567778	0.0602872	0.590461	0.455881	0.778478	0.159768	0.797377	0.286847	0.0685828	0.169558
0.638102	0.0420338			0.366692	0.0357571	0.0095139	0.676842	0.368366	0.131367	0.779912	0.009095	0.0368087	0.391414	0.87102	0.0847065	0.10531	0.268661
0.775086	0.188864			0.648833	0.0257315	0.995741	1.45108e-07	0.479563	0.385152	0.689237	0.13468	0.426842	0.141955	0.846126	0.0426464	0.124723	0.278688
0.411013	0.36341			0.618639	0.325908	0.671224	0.0524931	0.597593	0.385285	0.51692	0.407129	0.130741	0.352266	0.408524	0.022752	0.25056	0.357016
0.495841	0.243527			0.61101	0.157487	1	5.03414e-06	0.448151	0.465635	0.398961	0.359016	0.634132	0.350534	0.889148	0.11521	0.0552975	0.159676
0.730299	0.211002			0.593425	0.190911	0.890084	0.00623864	0.365663	0.278147	0.154379	0.0321226	0.471073	0.246878	0.328133	0.0704509	0.157865	0.181398
0.827044	0.319831			0.885362	0.0390647	0.979448	0.999921	0.499906	0.211652	0.615022	0.502407	0.744592	0.11613	0.119731	9.12966e-05	0.465583	0.259257
0.253904	0.141443			0.880558	0.0221375	0.0206693	0.000416882	0.73608	0.286438	0.335984	0.0898553	0.500217	0.415994	0.303319	0.0898613	0.0748765	0.392111
0.723011	0.11991			0.439709	0.0357277	0.910856	0.00125796	0.199106	0.00619883	0.463667	0.439465	0.459497	0.310775	0.591229	0.0636652	0.617863	0.0509438
0.828559	0.172472			0.496636	0.172557	0.947906	0.000183875	0.391299	0.434465	0.973936	0.265425	0.475564	0.412062	0.190576	0.217653	0.149182	0.272251
0.972499	0.00475529			0.503805	0.125697	0.0793404	0.000633811	0.520292	0.467525	0.0112693	0.0952082	0.472503	0.583485	0.184219	3.15118e-06	0.491538	0.16639
0.39557	0.00934096			0.289953	0.10658	0.608461	0.0149725	0.422934	0.384953	0.000489272	0.267911	0.212197	0.343349	0.195834	0.0227057	0.348206	0.193912
0.47545	0.415652			0.543015	0.225432	0.0159253	0.928972	0.994345	0.330285	0.488948	0.0437925	0.447244	0.384083	0.90928	0.0783209	0.154573	0.360571
0.393947	0.19941			0.999104	0.0545672	0.999783	0.374901	0.508418	0.465821	0.0144094	0.278506	0.42678	0.377768	0.967227	0.124883	0.658812	0.255045
0.402353	0.231654			0.798099	0.226126	0.263119	1.11808e-05	0.990031	0.409284	0.490338	0.335306	0.60202	0.441331	0.362036	0.0428431	0.440843	0.179777
0.371579	0.418781			0.428938	0.0171935	0.0094163	0.000307804	0.339217	0.188389	0.464565	0.0753623	0.637504	0.146851	0.353713	0.245356	0.199754	0.319178
0.524343	0.0222935			0.723507	0.0417197	0.952479	0.561703	0.403884	0.413181	0.973669	0.298768	0.57287	0.465645	0.952842	0.0373242	0.564426	0.0221514
0.581127	0.218284			0.876102	0.053789	0.942585	1.7304e-06	0.185006	0.568893	0.451293	0.0109023	0.647216	0.312456	0.991161	0.182001	0.495034	0.219058
0.923268	0.114769			0.449483	0.0701655	0.0586958	2.87625e-05	0.462677	0.0608601	0.0056436	0.278182	0.412891	0.519112	0.8217	0.0626279	0.221324	0.394722
0.521386	0.0700683			0.379727	0.0196848	0.990403	1.34079e-08	0.144055	0.62201	8.06579e-06	0.485024	0.432114	0.0632439	0.316201	0.171169	0.170952	0.37609
0.368936	0.09669			0.295245	0.335543	1.63013e-05	0.0336824	0.71788	0.359772	0.381985	0.254863	0.657613	0.263303	0.155144	0.000397796	0.331103	0.391879
0.323459	0.0757747			0.902204	0.032711	0.118158	0.996509	0.995682	0.544166	0.540772	0.00447185	0.322614	0.303375	0.01873	0.00156567	0.21725	0.264628
0.308881	0.387713			0.502372	0.0458895	0.359279	2.82471e-05	0.649552	0.257481	0.438017	0.0373588	0.568534	0.477682	0.568567	0.110145	0.158199	0.326055
0.56194	0.153994			0.841139	0.0948298	0.9932	0.000162535	0.520848	0.215016	0.0609304	0.236537	0.01649	0.281499	0.965183	0.00120263	0.204135	0.29878
0.321241	0.0915971			0.771647	0.123148	0.99745	3.50796e-09	0.394521	0.261756	0.0032748	0.00390069	0.553802	0.300896	0.289894	0.0244861	0.264111	0.293454
0.768627	0.133943			0.38942	0.138962	0.66331	0.0437977	0.543112	0.165607	0.908187	0.396334	0.453273	0.428532	0.00554207	2.66947e-05	0.272882	0.21624
0.606001	0.333787			0.452813	0.00686847	0.53229	0.68882	0.467404	0.207563	0.477936	0.000883474	0.407347	0.457481	0.660418	0.0495859	0.326545	0.497883
0.480435	0.0323485			0.438528	0.000818405	0.0642643	0.0379545	0.605559	0.344622	0.600425	0.077755	0.520764	0.427463	0.44456	0.18684	0.592871	0.408122
0.346393	0.163577			0.556913	0.0536462	0.997929	0.0391415	0.433978	0.0319529	0.330978	0.21114	0.519338	0.263668	0.03855	0.046269	0.507903	0.313353
0.469238	0.00188538			0.683162	0.11588	0.96278	0.0703852	0.503473	0.44547	0.00246549	0.338966	0.237564	0.119836	0.427121	0.0544427	0.553225	0.432055
0.575661	0.191675			0.613914	0.298242	0.998779	1.22624e-06	0.319407	3.30144e-05	0.540529	0.303911	0.503884	0.382765	0.03063	0.00307472	0.446941	0.31454
0.769125	0.230122			0.694152	0.062596	0.839005	3.79104e-06	0.441789	0.109145	0.548497	0.256977	0.365921	0.250878	0.269416	0.0247045	0.30992	0.276654
0.480684	0.0799461			0.609435	0.185843	0.997357	3.40926e-07	0.371579	0.384847	0.297244	0.0687209	0.614416	0.337607	0.443426	1.1318e-05	0.456321	0.214186
0.304199	0.174845			0.44571	0.00231243	0.0364107	0.16157	0.954924	0.229904	0.525808	0.0868637	0.795795	0.362582	0.154318	0.0819819	0.397456	0.265862
0.489763	0.203248			0.788718	0.064123	0.999056	3.03192e-08	0.598876	0.261918	0.555678	0.362579	0.319272	0.404349	0.0306923	0.000285803	0.200171	0.526007
0.216952	0.000186457			0.611404	0.300111	0.0840994	0.000243834	0.945101	0.422294	0.0226311	0.291303	0.469838	0.19517	0.241569	0.319444	0.656762	0.164969
0.420311	0.0107978			0.748756	0.343845	0.998746	0.000784535	0.466798	0.0014484	0.536766	0.0333274	0.477286	0.387016	0.999768	0.0260301	0.486688	0.384461
0.283059	0.270471			0.975918	0.238541	0.993778	0.272773	0.614749	0.486976	0.247327	0.402242	0.406867	0.368839	0.989977	0.0273024	0.333138	0.0800408
0.445831	0.308832			0.693872	0.0775198	0.41387	0.00043535	0.47115	0.2445	0.377184	0.382115	0.595335	0.358882	0.127055	0.000234708	0.38927	0.33055
0.290273	0.222331			0.196723	0.0410066	0.905511	0.107296	0.408144	0.370216	0.177291	0.479907	0.480643	0.436534	0.611891	0.0994105	0.0595401	0.411162
0.217212	0.0262328			0.933348	0.0755163	0.838994	0.944234	0.413856	0.309056	0.460918	0.290478	0.575575	0.0994169	0.0581955	0.0711132	0.326544	0.231851
0.324708	0.0774958			0.440252	0.0359451	0.985591	0.00378256	0.523361	0.0468172	0.459706	8.62737e-05	0.477085	0.378608	0.763719	0.0306343	0.0499068	0.421779
0.497848	0.279892			0.428745	0.00727186	0.841606	0.0137091	0.957723	0.318454	0.469681	0.00070182	0.734794	0.468317	0.972921	0.101203	0.411124	0.472386
0.788566	0.223262			0.884775	0.0338186	0.955765	0.828065	0.483214	0.454007	0.039047	0.2512	0.570633	0.343389	0.338959	0.722784	0.172843	0.336297
0.410422	0.0661076			0.521279	0.0661201	0.57914	4.38137e-06	0.335239	0.255304	0.406306	1.0756e-09	0.532103	0.387063	0.671796	0.0999726	0.131453	0.443864
0.246413	0.102248			0.436366	0.228611	0.00080647	0.86436	0.53847	0.366823	0.40367	4.17014e-06	0.432415	0.387626	0.141717	0.000513873	0.146378	0.112884
0.463976	0.049953			0.391037	0.0347911	0.837702	2.87232e-07	0.54357	0.128658	0.413676	0.000388632	0.528528	0.224465	0.0361133	0.0135405	0.277603	0.328625
0.716112	0.348561			0.875655	0.000286777	0.999247	0.00496117	0.655082	0.381784	0.459667	0.296085	0.401909	0.21662	0.0797534	0.176115	0.656523	0.436801
0.391968	0.425957			0.337117	0.090048	0.986956	0.0211279	0.209885	0.0854261	0.195684	0.0171251	0.665277	0.474264	0.25463	0.0201244	0.626059	0.424707
0.250892	0.124565			0.183972	0.26743	0.999999	1.60387e-06	0.562342	0.701939	0.00199695	0.346969	0.390023	0.322975	0.157833	0.00806213	0.165576	0.16141
0.142852	0.536236			0.615088	0.104731	0.47802	7.10033e-05	0.603578	0.00734776	0.0128107	0.256313	0.498236	0.363599	0.595125	0.0340074	0.559958	0.132224
0.395783	0.166262			0.603674	0.465451	0.400061	0.000125292	0.509711	0.172939	1	0.137616	0.58177	0.280253	0.0256947	0.0430624	0.311072	0.276143
0.483061	0.182141			0.631674	0.0944449	0.337387	0.00569692	0.264933	0.637707	0.513701	0.0168446	0.489059	0.206555	0.299747	0.00040652	0.226919	0.353853
0.308005	0.165223			0.871033	0.0598837	0.85798	0.000501868	0.964363	0.215366	0.439581	0.0129969	0.271832	0.390455	0.300624	0.247589	0.414925	0.191716
0.667463	0.0908103			0.451404	0.19869	0.999999	0.000170889	0.425587	0.514414	0.457679	0.000719066	0.517746	0.594371	0.132614	0.118655	0.193025	0.35926
0.302615	0.335081			0.869877	0.0177154	0.999724	6.73939e-07	0.601467	0.142846	0.944725	0.105313	0.464168	0.305083	0.0595622	0.337759	0.481421	0.113541
0.388603	0.0400072			0.532803	0.0249949	0.990417	1.55761e-05	0.42492	0.311758	0.998804	0.0317473	0.347286	0.40885	0.999976	0.139097	0.355233	0.102633
0.285542	0.312185			0.673731	0.0298766	0.47246	3.29738e-06	0.48559	0.419502	0.144117	0.230101	0.539128	0.385856	0.767482	0.0715969	0.447534	0.38834
0.486529	0.13792			0.893304	0.437719	9.59003e-05	9.28624e-07	0.122819	0.356194	0.614509	0.200078	0.449739	0.327692	0.146665	0.13479	0.224909	0.314366
0.660925	0.350332			0.353932	0.0523052	0.997149	0.000146966	0.653342	0.171656	0.99983	0.261511	0.338387	0.312838	0.482883	0.0765487	0.140869	0.288625
0.618051	0.395062			0.374999	0.00493571	0.00172798	0.000510709	0.203398	0.4468	0.646211	0.000497764	0.767366	0.225124	0.466627	0.330965	0.142991	0.106146
0.565992	0.10599			0.26673	0.131985	0.923645	1.5603e-06	0.379845	0.236443	0.0260048	0.154325	0.510115	0.0688842	0.34403	0.0085633	0.382566	0.204959
0.777968	0.417631			0.0593703	0.00166094	0.998769	0.921278	0.474213	0.575781	0.0892426	0.000276998	0.430008	0.306196	0.0080725	0.0103495	0.264496	0.342284
0.425964	0.118325			0.480456	0.0252597	0.78773	0.00163335	0.0934169	0.300337	0.0203046	0.119278	0.417	0.309189	0.203825	9.83289e-05	0.661231	0.231845
0.873603	0.241406			0.113466	0.290298	0.582964	0.0746976	0.126576	0.371819	0.504335	0.490086	0.495243	0.401408	0.475226	0.124763	0.339339	0.27111
0.648399	0.410023			0.496951	0.0405326	0.999113	0.00239793	0.136981	0.239701	0.682255	0.000133777	0.513014	0.351243	0.926733	0.194322	0.393664	0.223394
0.796527	0.39844			0.525087	0.117635	0.999993	0.203548	0.943052	0.409308	0.39708	0.522802	0.515266	0.434623	0.0151661	0.0243446	0.119826	0.176263
0.436754	0.162449			0.425907	0.156634	4.5468e-05	0.0145958	0.635993	0.279689	0.295212	0.379292	0.635437	0.29212	0.427121	0.191269	0.365803	0.265788
0.429158	0.535368			0.570566	0.237846	0.0313029	0.973916	0.989933	0.260057	0.00891232	0.000239929	0.673131	0.2463	0.675741	0.0988839	0.197603	0.276176
0.545478	0.224471			0.493588	0.539917	0.878623	0.0176282	0.150323	0.19732	0.0170421	0.0674141	0.664162	0.384077	0.463292	0.00996655	0.841417	0.116551
0.647252	0.024984			0.394983	0.126554	0.242617	0.000519266	0.484513	0.202583	0.428978	0.109811	0.431438	0.451469	0.0225941	0.0116889	0.0913532	0.2973
0.313653	0.0578254			0.519828	0.0242466	0.994997	0.00462475	0.437652	0.328584	0.564809	0.0177458	0.340237	0.161441	0.524663	0.13753	0.257069	0.249268
0.422665	0.0607661			0.353963	0.0116599	0.482085	0.961935	0.329462	0.0679676	0.124082	0.0350131	0.393106	0.443347	0.999938	0.000852943	0.166662	0.128325
0.481312	0.0689302			0.711643	0.00326227	2.37915e-05	4.40182e-06	0.577042	0.469364	0.31557	0.0262154	0.301048	0.321015	0.99995	0.195564	0.0603962	0.0741209
0.577935	0.26523			0.555942	0.0358047	0.000813172	0.000202128	0.911139	0.471556	0.408401	0.0113397	0.588796	0.329741	0.937963	0.150082	0.591936	0.286987
0.505078	0.298748			0.639262	0.376366	0.48215	1.19879e-05	0.526847	0.450157	0.144117	0.201714	0.631183	0.250765	0.00162996	9.48818e-05	0.227371	0.248626
0.231123	0.138335			0.663986	0.320423	0.0774616	0.152612	0.432579	0.163071	0.0638233	0.126217	0.600911	0.408762	0.516569	0.0320011	0.105042	0.465465
0.903036	0.373273			0.905667	0.311512	0.923299	0.0543807	0.993761	0.274845	0.657519	0.358897	0.467199	0.29817	0.833978	0.285497	0.186846	0.801609
0.0576898	0.0251506			0.475986	0.223272	0.999916	0.716508	0.31281	0.127995	0.256111	0.000225215	0.478938	0.296271	0.995162	4.99173e-05	0.0740066	0.24418
0.306589	0.177167			0.370262	0.0390004	0.945323	0.00252896	0.609134	0.510051	0.0055721	0.92448	0.44374	0.354992	0.0763037	0.465588	0.147401	0.376484
0.60207	0.549038			0.997656	0.0554193	0.991999	0.00301629	0.13513	0.478156	0.0458648	0.0156772	0.242957	0.291446	0.483065	0.000929843	0.141362	0.36327
0.745352	0.42011			0.705603	0.139326	0.966893	3.39781e-06	0.362572	0.334381	0.0768906	0.354585	0.460659	0.443812	0.0564614	0.0562955	0.638983	0.348306
0.271712	0.120764			0.499847	0.00165529	0.900476	0.0252623	0.42512	0.185382	0.086919	9.22899e-06	0.506743	0.439904	0.584734	1.79785e-06	0.672082	0.318552
0.454488	0.0524691			0.403815	0.0187427	0.99994	9.37546e-07	0.333282	0.231656	0.0898086	0.00220556	0.484871	0.335982	0.705899	0.102457	0.0403273	0.279379
0.383644	0.254898			0.500241	0.0590965	0.021623	6.12146e-05	0.503982	0.420532	0.00890884	0.117045	0.6705	0.334434	0.871616	0.0380777	0.127099	0.375884
0.705473	0.135091			0.608392	0.0413441	0.000829937	0.405367	0.543163	0.0554282	0.231725	0.00520722	0.438629	0.270501	0.800743	0.0845311	0.314324	0.240682
0.638151	0.155864			0.361474	0.0419994	0.999989	1.9131e-06	0.129742	0.414256	0.428989	0.000867224	0.374779	0.360676	0.351063	0.149073	0.246979	0.0827719
0.262769	0.273434			0.676722	0.0794451	0.99165	0.00126594	0.268092	0.0156704	0.121682	0.0260054	0.479909	0.11135	0.374888	0.00501582	0.313494	0.501246
0.454841	0.56601			0.47047	0.0837093	0.999995	3.25213e-05	0.428782	0.323392	0.4845	0.0705606	0.287416	0.243198	0.0461215	0.563148	0.0967813	0.226586
0.564223	0.156146			0.0138705	0.0042069	0.897615	4.58878e-07	0.610321	0.303521	0.11754	0.368567	0.431814	0.385942	0.843915	0.0663626	0.455544	0.152693
0.445165	0.110525			0.505043	0.31011	0.9989	0.0117661	0.498221	0.273386	0.00013909	0.0950074	0.372133	0.320165	0.291114	0.638227	0.381275	0.331968
0.588124	0.212081			0.510221	0.0697539	0.976076	0.00181957	0.447794	0.301165	0.241354	0.0925661	0.464008	0.0985116	0.0160006	0.00167059	0.453101	0.324433
0.48127	0.20019			0.622645	0.0234026	0.972926	0.0577077	0.413546	0.45549	0.0682855	0.108147	0.416066	0.305688	0.935532	0.0462855	0.0163398	0.613738
0.551402	0.0848771			0.822516	0.1125	0.00903881	3.84227e-08	0.76454	0.260401	5.25374e-05	0.146749	0.513081	0.397194	0.220254	0.07179	0.259133	0.266678
0.514453	0.234375			0.556041	0.109631	0.0113771	0.950419	0.43645	0.542562	0.0222344	0.0153917	0.482937	0.230566	0.0302077	0.359654	0.278931	0.409953
0.339922	0.278923			0.188171	0.189133	0.904694	1.19571e-05	0.243251	0.269021	0.255079	0.247632	0.38921	0.293746	0.201781	0.164708	0.0135402	0.480135
0.638542	0.0648449			0.458967	0.138868	0.239045	0.12887	0.573174	0.194593	0.63637	0.324811	0.479966	0.230199	0.861491	0.0647229	0.328064	0.0787311
0.415181	0.406705			0.725452	0.48936	0.90352	0.00161476	0.94249	0.112639	0.904446	0.0618824	0.451199	0.400023	0.126555	0.0495635	0.177775	0.133424
0.423484	0.0578489			0.798785	0.0792076	0.999665	0.998973	0.577156	0.373928	0.350762	0.819916	0.297212	0.489336	0.0238856	0.0998375	0.021446	0.219613
0.48792	0.358847			0.714535	0.0147505	0.846471	0.00105192	0.99255	0.388702	0.36404	0.145559	0.477607	0.258732	0.295735	0.329948	0.374884	0.156075
0.284043	0.272408			0.432017	0.188778	1.31917e-05	0.0105157	0.613569	0.531183	0.00897462	0.0301869	0.444954	0.395144	0.835769	0.290948	0.120575	0.301182
0.341491	0.426999			0.849087	0.131129	0.000263393	0.857051	0.49726	0.408295	0.218901	0.329872	0.480022	0.43345	0.101817	0.0762981	0.261236	0.25549
0.501783	0.211166			0.230042	0.324925	0.99699	0.995185	0.449018	0.535822	0.471007	0.000825367	0.700068	0.241151	0.731199	0.0160935	0.300261	0.358661
0.951872	0.0625838			0.524295	0.195404	0.0124656	0.0692283	0.990533	0.393057	0.751087	0.0600216	0.490993	0.189623	0.302903	0.266251	0.0795702	0.600637
0.686586	0.059084			0.441618	0.0326733	0.610918	0.000582336	0.388175	0.447329	0.179194	0.0352727	0.43578	0.0843265	0.117835	0.284488	0.254079	0.357365
0.330594	0.193324			0.965091	0.0278724	0.243808	0.996094	0.456926	0.256246	0.00513939	0.0010056	0.526424	0.324718	0.291806	0.133673	0.319563	0.464383
0.5527	0.0114414			0.999504	0.249618	0.0721838	0.983448	0.456532	0.236921	0.0110342	0.15653	0.26824	0.41098	0.13979	0.000249263	0.208467	0.222096
0.321509	0.276495			0.441438	0.00842558	0.896149	4.75503e-07	0.62521	0.354033	0.0078683	0.00041003	0.333112	0.213234	0.968379	0.149798	0.374411	0.22869
0.740722	0.0192769			0.368881	0.000101365	0.962169	5.08851e-06	0.781056	0.242557	0.00768424	0.000330229	0.466016	0.474572	0.999886	0.0987312	0.0313438	0.363679
0.279479	0.39453			0.784886	0.0383819	3.74598e-06	0.00013874	0.445729	0.459849	0.0516505	0.118865	0.590418	0.51502	0.994894	0.032029	0.300091	0.625299
0.970126	0.0911335			0.42974	0.0919105	0.0242775	0.00476968	0.465773	0.380509	0.613629	0.426184	0.469097	0.29068	0.0933122	0.000622573	0.237761	0.0495522
0.71182	0.195564			0.516811	0.0448553	0.995905	0.981663	0.451645	0.301363	0.697241	0.306346	0.463588	0.434411	0.998697	0.387527	0.415614	0.360391
0.173744	0.0220388			0.728055	0.222177	0.973876	2.68978e-06	0.792889	0.304378	0.888028	0.388688	0.553336	0.15976	0.904486	0.106904	0.325474	0.0881755
0.597842	0.40193			0.596614	0.0338747	0.0367506	0.0195738	0.98712	0.420069	0.601605	0.381951	0.343242	0.284948	0.989194	0.119697	0.32164	0.0792876
0.599915	0.218058			0.503357	0.615138	0.000158544	0.00449221	0.392371	0.218299	0.0973238	0.792467	0.510589	0.327718	0.503305	0.024279	0.228393	0.109985
0.310076	0			0.504941	0.0357875	0.957281	0.0138908	0.58243	0.314967	0.00899011	0.246906	0.63386	0.498609	0.239585	0.0593676	0.360503	0.34171
0.725829	0.187507			0.732269	0.0669379	0.544897	0.0114502	0.817457	0.229318	0.19774	0.263173	0.583603	0.378415	0.128249	0.109285	0.462914	0.166232
0.315686	0.599131			0.638557	0.06765	5.28208e-05	0.0119741	0.527901	0.627699	0.438167	0.241071	0.425309	0.0740951	0.320324	0.249033	0.101026	0.112851
0.224713	0.194267			0.166226	0.191068	3.65092e-06	0.000107538	0.10635	0.512403	0.342404	0.404606	0.190736	0.582327	0.999845	0.0334202	0.192507	0.222543
0.408476	0.329838			0.338947	0.44548	0.999844	0.602898	0.63016	0.581758	0.973935	0.0274679	0.475428	0.368807	0.0851959	0.0924348	0.367309	0.196499
0.52151	0.280307			0.481029	0.00568367	0.948354	0.994875	0.553692	0.342245	0.501263	0.347543	0.415046	0.282381	0.992311	0.286397	0.472915	0.245832
0.488009	0.264755			0.540406	0.0852743	0.93165	4.53723e-05	0.990532	0.408208	0.094707	0.267657	0.48863	0.269514	0.944307	0.00015576	0.422498	0.358202
0.215587	0.0144307			0.44808	0.0518569	1	0.000123537	0.539075	0.461992	0.441248	0.039791	0.524175	0.38597	0.0151661	0.176115	0.662977	0.194871
0.192533	0.129813			0.901291	0.0575727	0.907949	0.000105573	0.479112	0.037691	0.248273	0.0101423	0.708694	0.252852	0.0414049	0.290611	0.45565	0.249872
0.976091	0.277778			0.454673	0.141237	0.975451	0.00430003	0.4427	0.250644	0.0208728	0.765854	0.422043	0.420245	0.526062	0.0657868	0.37442	0.27111
0.260674	0.371495			0.00791763	0.0810264	2.26961e-06	0.0584807	0.44177	0.443033	0.334933	0.0712362	0.4199	0.14979	0.0898342	0.0616468	0.217386	0.411422
0.309236	0.111412			0.491304	0.106953	0.999992	0.0213164	0.641431	0.213017	0.488672	0.0409797	0.423071	0.387052	0.999901	0.136986	0.30847	0.332727
0.418308	0.115367			0.669568	0.000132704	0.999958	1.61533e-09	0.709427	0.452975	0.000459334	0.000166586	0.69285	0.454254	0.257966	0.243699	0.527063	0.48465
0.412446	0.158369			0.375611	0.191794	9.52779e-07	0.000699866	0.497271	0.479371	0.430284	0.0234032	0.456499	0.356352	0.702705	0.158465	0.268043	0.235876
0.411394	0.0524325			0.186212	0.15719	0.0350377	0.00319026	0.372325	0.723396	0.979606	5.11846e-09	0.461777	0.400362	0.992759	0.322288	0.411331	0.589797
0.490562	0.236433			0.569098	0.422979	0.308611	0.000110872	0.538927	0.444755	0.188803	0.137569	0.351311	0.309667	0.882421	0.0121384	0.423489	0.149936
0.290939	0.0257949			0.675951	0.185592	0.716374	6.4636e-05	0.61309	0.00481741	0.00206842	0.214386	0.515562	0.461246	0.26125	0.0146412	0.167127	0.589797
0.252678	0.173978			0.436835	0.000218547	0.00308113	0.000912709	0.882209	0.437398	0.384566	0.0451037	0.408057	0.346067	0.0997395	0.0710936	0.391212	0.56522
0.698701	0.590434			0.441644	0.135261	0.99884	2.09307e-07	0.408853	0.550647	0.00788065	0.113295	0.784683	0.43625	0.334423	0.0607824	0.163224	0.441594
0.493183	0.22836			0.921626	0.00623393	0.0589043	0.000734464	0.396359	0.421415	0.842901	0.0841819	0.356737	0.315131	0.893511	0.168714	0.255074	0.303766
0.382759	0.0166578			0.450365	0.101984	0.96432	0.781524	0.532743	0.385265	0.809288	0.0219232	0.678494	0.305512	0.764454	0.0980235	0.637821	0.249681
0.362866	0.165281			0.427044	0.212256	0.99942	0.865181	0.130756	0.149528	0.0348973	0.0337696	0.412136	0.304665	0.526411	0.207839	0.547308	0.27158
0.493971	0.532035			0.433174	9.34916e-05	0.945234	1.73901e-07	0.386626	0.212457	0.616429	0.273391	0.595733	0.450924	0.0935266	0.142219	0.0153028	0.417334
0.207553	0.744179			0.360233	0.0283306	0.995524	1.07598e-05	0.661	0.546203	0.481636	3.18587e-05	0.483405	0.470015	0.0324844	0.103561	0.27016	0.330267
0.654596	0.320604			0.456165	0.0353304	0.998406	0.0152171	0.392513	0.208638	0.967496	0.433129	0.481366	0.265408	0.111465	2.08306e-05	0.337458	0.430801
0.312969	0.299962			0.282291	0.190128	0.255665	0.0013507	0.558371	0.253779	0.0762717	0.348847	0.567636	0.406533	0.0819134	0.0531227	0.442206	0.115712
0.569799	0.343729			0.480874	0.212628	0.988162	4.81927e-07	0.568435	0.23084	0.638517	7.77405e-10	0.475974	0.528569	0.769238	0.0682923	0.361704	0.0540314
0.418303	0.187806			0.44952	0.0435547	0.872009	0.00466633	0.762835	0.291182	0.614299	0.486871	0.305709	0.394142	0.119421	0.0118867	0.395176	0.0792293
0.510973	0.000220386			0.26514	0.183431	8.3794e-05	0.808624	0.344712	0.343108	0.0480884	0.310671	0.472805	0.482222	0.259155	0.240182	0.0832341	0.346272
0.493892	0.156404			0.936595	0.0886203	0.99972	0.644478	0.626102	0.0633712	0.604549	0.369542	0.441771	0.268905	0.107646	0.0437822	0.167696	0.175377
0.280144	0.0377384			0.712479	0.121863	0.0980177	0.00428019	0.404305	0.334001	0.0792025	0.207189	0.473886	0.300527	0.998521	0.0244878	0.415352	0.371873
0.293706	0.0686651			0.267849	0.04514	0.186146	0.00276847	0.59431	0.197094	0.400008	0.00128456	0.570326	0.300432	0.164316	0.546858	0.25885	0.496045
0.410987	0.259225			0.465077	0.0434456	0.597449	3.73652e-05	0.356412	0.213927	0.366047	0.481133	0.77397	0.514033	0.0208265	0.157872	0.265465	0.366865
0.642122	0.0065604			0.128503	0.00496841	1	0.00685398	0.204737	0.245544	0.000252537	0.172457	0.479297	0.386235	0.291507	0.398713	0.410008	0.0754988
0.354663	0.241781			0.390171	0.00634291	9.32721e-08	1.67498e-05	0.483124	0.40822	0.999936	0.488299	0.365401	0.341834	0.566262	0.0451396	0.189284	0.291866
0.349627	0.100418			0.620231	0.167301	0.9998	0.000653945	0.386198	0.229686	0.928627	0.0205618	0.672668	0.362987	0.271223	0.173022	0.139227	0.410065
0.537976	0.130481			0.511541	0.0303209	0.999987	0.00222592	0.458097	0.00643879	0.377184	0.102749	0.330126	0.405133	0.856359	0.0668492	0.238431	0.188129
0.470344	0.268482			0.452653	0.0764349	0.00237268	0.00079073	0.490898	0.914018	0.484869	0.216561	0.421167	0.277218	0.999844	0.0998375	0.516197	0.450206
0.528984	0.361889			0.545747	0.00022656	0.473136	0.975095	0.437447	0.189987	0.418169	0.0818819	0.41597	0.440642	0.414743	0.0658811	0.475196	0.230019
0.776305	0.224774			0.870303	0.0887096	0.554182	3.82694e-05	0.550344	0.241051	0.463501	0.0141603	0.406843	0.379091	0.0662185	0.0398889	0.0275737	0.233506
0.464655	0.273544			0.34832	0.00697677	3.08965e-05	0.00501599	0.328711	0.232946	0.0202663	0.357014	0.710923	0.296123	0.322889	0.130098	0.387483	0.329265
0.493878	0.332397			0.572868	0.057445	1.57891e-05	0.0252499	0.445995	0.419443	0.242355	0.0884097	0.519507	0.325614	0.0348034	8.75943e-06	0.327099	0.334442
0.516307	0.306515			0.769289	0.153436	0.000279254	0.858704	0.361753	0.226841	0.550888	0.184544	0.714963	0.236245	0.993202	0.0400169	0.436236	0.16223
0.332	0.213746			0.109026	0.240102	0.525211	0.000295553	0.402285	0.162875	0.289905	0.194223	0.545048	0.335699	0.0693405	0.11951	0.667176	0.328912
0.669366	0.0717706			0.542265	0.270231	0.890306	0.00107686	0.994361	0.283702	0.573337	0.0946289	0.233358	0.261498	0.342818	0.0519263	0.208863	0.503813
0.517689	0.0164143			0.441041	0.0256445	3.8314e-06	0.000607605	0.545875	0.295121	0.295975	2.28499e-05	0.4393	0.141075	0.11418	0.149782	0.224332	0.294877
0.355638	0.183306			0.35429	0.107953	0.986635	0.845265	0.43821	0.260835	0.594531	0.323371	0.606641	0.284878	0.364371	0.133273	0.0611717	0.246056
0.265987	0.101421			0.347941	0.0276281	0.985938	0.00190546	0.407396	0.573276	0.0406146	0.0207615	0.385597	0.489823	0.486295	0.478725	0.731472	0.0765971
0.168791	0.313281			0.43484	0.124617	0.731205	0.000357749	0.581997	0.376398	0.012664	0.115011	0.403316	0.499258	0.391874	0.0011896	0.51071	0.331459
0.058298	0.115063			0.471964	0.31435	0.996551	0.967687	0.672537	0.338228	0.701966	0.000305682	0.419605	0.390157	0.413743	0.0547504	0.358286	0.244675
0.307698	0.350897			0.516355	0.253231	0.425515	7.03725e-09	0.423527	0.385455	0.803566	0.255971	0.423846	0.431627	0.0252084	0.00350216	0.285733	0.1852
0.749017	0.161243			0.519673	0.0111199	0.000445691	5.94883e-06	0.432322	0.254584	0.0497841	0.0558978	0.608184	0.261617	0.119443	0.221674	0.361373	0.234351
0.730354	0.452117			0.354008	0.177418	0.99994	0.228879	0.783878	0.391745	0.129653	0.534226	0.192082	0.348293	0.372029	0.0596437	0.369254	0.7294
0.741648	0.19056			0.173084	0.0534357	0.880298	3.02134e-05	0.738528	0.272684	0.331175	0.0300974	0.373458	0.378725	0.144941	0.29518	0.076617	0.222822
0.273041	0.0253089			0.238483	0.153163	7.01698e-05	0.0073621	0.593988	0.259259	0.000419238	0.0514345	0.377479	0.421589	0.42736	0.175106	0.307181	0.155352
0.527453	0.131881			0.633544	0.0776279	0.964172	0.831856	0.483538	0.231418	0.00598592	0.000330987	0.506416	0.392118	0.276763	0.0507683	0.129634	0.373726
0.561564	0.270498			0.546659	0.196343	0.472128	9.87211e-06	0.180787	0.357759	0.703368	0.0984002	0.42607	0.30497	0.96962	0.319925	0.397345	0.398856
0.578846	0.111491			0.326948	0.129977	0.000243629	0.121326	0.557705	0.618532	0.451944	0.00335136	0.693382	0.354623	0.918723	0.362785	0.365541	0.14279
0.310232	0.171401			0.830769	0.0305258	0.998469	0.00883305	0.574895	0.0713515	0.353402	0.266396	0.475523	0.367837	0.685686	0.133963	0.26287	0.232154
0.322116	0.0212239			0.84944	0.0285106	0.713466	7.97095e-05	0.875588	0.406512	0.549827	0.119278	0.51982	0.3585	0.114839	0.12979	0.150488	0.39762
0.366873	0.548357			0.226332	0.1226	0.00137595	0.000215205	0.427465	0.383455	0.07646	0.652568	0.340104	0.438014	0.466417	0.0198618	0.350233	0.164402
0.445767	0.225637			0.522499	0.0329267	0.00375964	0.00307315	0.295566	0.203771	0.898946	0.00565182	0.668698	0.0614033	0.565172	0.112183	0.345153	0.0582898
0.678901	0.435729			0.0262558	0.0108485	0.754981	0.00417275	0.48448	0.368151	0.480538	0.0752287	0.47305	0.171336	0.0760849	0.00552482	0.239748	0.574424
0.363622	0.0361141			0.690098	0.0724562	0.989484	0.102743	0.460769	0.171196	0.962557	0.249364	0.648946	0.283083	0.0488687	0.133028	0.294636	0.232135
0.676086	0.131652			0.000491931	0.0354633	0.04371	5.37809e-05	0.429489	0.408914	0.0937226	0.084632	0.535424	0.347822	0.922055	0.350459	0.142104	0.275737
0.743504	0.26247			0.101948	0.212835	0.00303029	0.000693216	0.497199	0.339945	0.00539312	0.42998	0.420744	0.44291	0.305906	0.00503244	0.453658	0.211248
0.146523	0.265233			0.582725	0.0290082	0.592602	1.71072e-07	0.604773	0.498153	0.579729	0.311707	0.439734	0.379397	0.566011	0.131386	0.530029	0.0881233
0.334359	0.151339			0.898223	0.152355	0.999263	0.573482	0.361366	0.0466927	0.3482	7.7248e-06	0.607061	0.785566	0.756955	0.000228062	0.0735029	0.306956
0.632332	0.240532			0.0384323	0.0270335	0.998415	0.0055963	0.732197	0.62116	0.000876131	0.0814311	0.450188	0.0577795	0.700895	0.388226	0.215183	0.223216
0.443649	0.161987			0.728597	0.137032	0.212304	0.00188757	0.355158	0.53865	0.471436	0.297488	0.536463	0.319418	0.799777	0.0512399	0.375357	0.144072
0.275785	0.0291976			0.333947	0.0737065	2.39486e-06	0.984898	0.465109	0.216584	0.308674	0.243098	0.796978	0.29849	0.603803	0.0409928	0.308834	0.346484
0.141372	0.0512274			0.519748	0.00547321	0.0935984	0.954388	0.558052	0.166025	0.611044	0.000494015	0.478566	0.522492	0.396189	0.0608677	0.192089	0.291695
0.406523	0.165854			0.451529	0.076541	0.517872	0.00535415	0.487833	0.400127	0.0540733	0.315453	0.465216	0.351716	0.105822	0.0909244	0.182527	0.241674
0.330713	0.222561			0.361835	0.0253647	0.000155756	1.98849e-07	0.464752	0.402583	0.146832	0.925595	0.520686	0.156296	0.370328	0.130361	0.136081	0.104533
0.504822	0.292779			0.716147	0.144882	0.0181742	1.29081e-05	0.478666	0.465139	0.302733	0.179166	0.505154	0.43008	0.573872	0.0697909	0.325411	0.242327
0.406867	0.34801			0.901283	0.206364	0.988628	3.86969e-05	0.178702	0.26907	0.159417	0.00447231	0.420893	0.403735	0.231029	0.000121719	0.156158	0.463396
0.599074	0.371338			0.206345	0.000127926	0.00023266	0.000185551	0.504975	0.0779905	0.0151086	0.0359088	0.556122	0.398745	0.422737	0.196325	0.114607	0.258693
0.317909	0.269963			0.356564	0.0884491	0.944263	0.936592	0.4093	0.588315	0.0245466	0.0125408	0.438055	0.519629	0.661934	0.0325973	0.163371	0.402357
0.407417	0.143328			0.774289	0.133852	0.999809	1.01081e-05	0.445227	0.360169	0.398208	0.390915	0.379455	0.422826	0.759423	0.00540233	0.276558	0.0846505
0.407385	0.0022968			0.765135	0.0446447	0.98495	1.60771e-05	0.519948	0.396062	0.399732	0.285705	0.564055	0.432032	0.412976	0.0103002	0.143579	0.266792
0.429614	0.586191			0.432204	0.0195672	0.341238	9.95611e-07	0.538742	0.00651368	0.227684	0.501518	0.306733	0.295404	0.367515	0.18352	0.393462	0.180896
0.349719	0.0488447			0.798186	0.0358501	0.00397558	0.00310799	0.427876	0.213389	0.298527	0.0677449	0.466876	0.414613	0.00784983	0.208939	0.407425	0.238396
0.390077	0.454529			0.880781	0.129903	0.94065	0.491263	0.0373709	0.404693	0.0058757	0.144798	0.405863	0.458624	0.555557	0.171887	0.141801	0.037123
0.494837	0.28103			0.21187	0.061798	0.994997	0.138663	0.439734	0.0117463	0.526258	0.016017	0.87628	0.204679	0.35397	0.00507448	0.315353	0.311123
0.330947	0.147706			0.811856	0.403823	0.370797	0.124684	0.504605	0.169933	0.602509	0.0020528	0.660577	0.100025	0.99114	0.255619	0.300588	0.467287
0.0558278	0.312531			0.556835	0.114996	0.00157417	0.639728	0.445603	0.377339	0.295171	0.401865	0.370022	0.432082	0.977811	0.269144	0.384096	0.158403
0.365399	0.27997			0.491927	0.196324	0.981188	0.000532325	0.591031	0.363689	0.412221	0.233963	0.199547	0.326307	0.995818	0.1341	0.157062	0.306481
0.27442	0.140357			0.58287	0.0552362	0.441845	2.12512e-08	0.123067	0.350354	0.00462039	0.0356098	0.459256	0.233112	0.337413	0.127739	0.101506	0.35289
0.470841	0.322028			0.497169	0.00735257	0.987211	0.00287237	0.729957	0.229113	0.155281	0.158443	0.233517	0.376329	0.787195	0.0810943	0.251393	0.279351
0.340613	0.164468			0.560639	0.144422	0.37576	9.72603e-06	0.21874	0.274388	0.279012	0.10447	0.209213	0.339326	0.842627	0.264776	0.248423	0.159866
0.629662	0.0636891			0.195256	0.258418	2.24069e-06	0.000184702	0.46029	0.424853	0.509432	0.0934996	0.219597	0.280653	0.312697	0.013258	0.401095	0.104258
0.270875	0.0139847			0.352484	0.0201602	0.00502935	2.2895e-07	0.581686	0.362883	0.765316	5.50818e-08	0.475203	0.304686	0.370777	0.176383	0.318525	0.677037
[truncated: 19,324 more rows]

## Sheet: Fig5-b
he_scores_1	ihc_scores_1	he_scores_2	ihc_scores_2	he_scores_3	ihc_scores_3	he_scores_4	ihc_scores_4	he_scores_5	ihc_scores_5	he_scores_6	ihc_scores_6	he_scores_7	ihc_scores_7	he_scores_8	ihc_scores_8	he_scores_9	ihc_scores_9	he_scores_10	ihc_scores_10	he_scores_11	ihc_scores_11	he_scores_12	ihc_scores_12	he_scores_13	ihc_scores_13	he_scores_14	ihc_scores_14	he_scores_15	ihc_scores_15	he_scores_16	ihc_scores_16	he_scores_17	ihc_scores_17	he_scores_18	ihc_scores_18	he_scores_19	ihc_scores_19	he_scores_20	ihc_scores_20
4.53134	0	0.708579	451609	2.73225	851643	0.295433	53988.3	0.596908	0	7.42063	3.145e+06	1.04427	150228	1.27809	505413	0.429551	31287.1	5.95605	1.51889e+06	9.73048	2.94584e+06	1.82319	0	1.32318	343376	5.46678	2.21747e+06	0.829797	0	3.48505	533599	0.52998	0	0.381459	0	1.63004	74455.8	7.0653	2.90078e+06
8.99349	946716	3.73999	969930	21.2002	6.34218e+06	1.67304	402050	1.96327	0	17.3954	4.14251e+06	4.04253	216411	3.99536	1.00766e+06	4.18913	252957	38.4828	4.99444e+06	14.5503	3.8574e+06	1.62657	1.52724e+06	8.77899	910968	9.54107	3.42137e+06	7.8661	0	5.96069	212638	12.1948	250743	0.576904	0	7.83897	486179	17.5431	4.25322e+06
8.09561	800381	2.32821	352495	17.0686	4.73356e+06	8.6932	1.50472e+06	1.0572	0	3.60903	824412	9.47976	1.53218e+06	2.25233	1.02091e+06	3.13954	143628	56.4322	1.09466e+06	8.4637	1.50786e+06	4.91767	0	15.3885	675878	7.09874	3.93365e+06	45.5316	0	6.91882	493125	7.94198	725137	0.373686	8425.89	18.7809	1.11675e+06	9.3821	2.35839e+06
1.43443	64777	6.31989	64803.4	16.3487	6.77924e+06	5.76212	302757	1.74073	0	7.98429	1.74651e+06	25.8287	1.91628e+06	0.439557	8990.76	5.96829	374099	0.328137	0	39.2297	5.01206e+06	5.91212	0	2.41771	0	5.54902	2.45231e+06	37.9264	0	6.60078	0	5.34125	125297	5.40342	15153	8.67401	1.75238e+06	5.49106	992242
17.0818	1.89891e+06	8.21225	425091	36.0669	8.99287e+06	3.27635	102068	6.45476	0	21.7583	2.443e+06	39.5025	2.36357e+06	5.16073	966536	2.73899	147598	3.14535	1.27049e+06	29.4246	1.99761e+06	25.7523	484406	0.427952	0	0.272994	570704	38.2338	0	2.08618	1.28515e+06	2.10602	0	0.519051	0	12.5783	2.11818e+06	2.86969	149298
19.1754	1.63366e+06	12.2896	1.59861e+06	38.6016	8.47058e+06	5.20472	315197	6.8915	56569.7	1.0594	206704	12.2977	950455	8.60307	2.66016e+06	11.2395	282403	18.9813	1.15152e+06	12.7258	733263	16.9629	1.3934e+06	3.42978	0	0.0608874	883557	12.6768	11435.5	6.99043	2.96556e+06	2.19348	0	0.215716	0	34.0807	4.10496e+06	4.43061	1.03608e+06
8.86798	1.22581e+06	5.24263	44855	32.6577	5.87797e+06	4.75703	284373	4.07588	13719.6	0.133577	57203.1	4.88586	96466.7	10.1242	4.62931e+06	27.555	1.04955e+06	6.44379	26908	8.91646	472530	14.1601	1.37366e+06	0.129869	0	4.82203	1.87569e+06	0.752713	0	18.6416	3.30879e+06	126.04	6.98016e+06	0.885794	60475.7	25.1325	4.61379e+06	1.01656	577122
0.508678	0	19.0978	2.8341e+06	30.1554	1.84896e+06	1.94062	23608.2	5.4758	0	4.22557	1.64151e+06	8.02355	93385.5	11.537	5.48597e+06	9.22496	531974	40.4646	2.16136e+06	7.28529	1.19759e+06	8.74556	1.27591e+06	8.64192	1.35482e+06	10.0501	1.77427e+06	16.4842	0	15.9085	1.28438e+06	95.6571	3.06355e+06	2.29358	375493	5.06298	0	32.9085	6.45697e+06
18.4978	646590	18.0977	3.57085e+06	6.33278	916984	1.01321	26506.2	2.21235	0	21.241	6.16946e+06	44.9828	2.75499e+06	8.93794	4.46045e+06	23.7818	1.12963e+06	50.9462	3.49455e+06	4.27989	354757	1.55858	392052	38.6876	3.34995e+06	12.4407	1.57571e+06	37.2339	0	8.59845	582829	5.85074	169959	0.814837	77010.9	6.95108	1.02072e+06	23.3355	6.90611e+06
8.7081	1.54281e+06	14.1613	2.42639e+06	6.60695	0	7.10027	1.17492e+06	5.41472	0	48.7797	6.62677e+06	142.377	4.61693e+06	1.70092	1.19325e+06	19.2415	360968	10.9933	177448	28.5622	4.87087e+06	4.67133	0	55.1835	4.40809e+06	8.4674	416462	25.9405	0	11.3008	0	14.5061	274231	1.18705	234994	14.7558	1.15115e+06	22.3321	4.76542e+06
29.1456	4.03659e+06	16.1859	774629	5.98308	2.31286e+06	16.4153	1.35815e+06	7.27234	0	45.4545	5.48604e+06	141.144	4.84281e+06	6.13004	849410	34.2188	1.43501e+06	5.2671	2.16387e+06	35.8739	8.18836e+06	11.9144	944336	51.8457	5.26008e+06	10.7084	426264	28.3663	268001	1.32966	0	56.8517	2.55408e+06	10.9338	1.67398e+06	12.5904	581858	8.5341	1.23207e+06
18.3219	3.60452e+06	13.6421	1.03399e+06	45.0744	6.20595e+06	17.0279	2.39677e+06	6.11648	142422	47.6701	5.96783e+06	41.3689	2.06084e+06	10.2664	2.54909e+06	14.3936	917189	17.8447	2.31806e+06	11.4082	2.39496e+06	9.9097	2.64174e+06	49.8874	4.3531e+06	33.0274	4.04787e+06	74.1438	2.7953e+06	0.403387	69066.6	43.3609	3.91936e+06	43.3572	2.61544e+06	21.5995	863673	7.09642	221283
49.2911	5.82232e+06	5.40437	61944.1	31.8312	5.45727e+06	16.5467	2.66957e+06	17.0172	7994.15	72.3673	5.18295e+06	4.0065	72204.7	13.4451	5.23326e+06	28.6019	1.06096e+06	44.5648	4.75488e+06	36.7468	4.91469e+06	9.1593	924081	24.5267	365377	41.3783	4.23085e+06	55.6308	6.80195e+06	4.93772	1.01117e+06	8.27189	1.00852e+06	6.93734	2.088e+06	41.2778	2.80709e+06	7.61136	314320
25.6373	4.86381e+06	4.34839	479694	24.9042	4.81017e+06	11.1725	1.06909e+06	6.95873	20829.2	54.1951	5.04045e+06	12.3382	133085	10.2464	6.21272e+06	2.5799	187341	105.403	5.61261e+06	81.2507	3.83853e+06	24.4406	2.44569e+06	4.64299	0	6.28856	1.35703e+06	51.4077	4.48851e+06	14.0825	6.06437e+06	2.41116	510809	7.15581	1.29631e+06	38.3818	4.52608e+06	13.0187	87667.5
25.3987	3.20514e+06	0.248817	1.18595e+06	71.948	9.4538e+06	8.39394	497408	11.6577	806832	40.4528	4.84323e+06	9.72989	118841	10.4457	4.74337e+06	1.03613	544185	116.821	5.32545e+06	16.1418	1.6772e+06	30.1154	7.3738e+06	0.154672	0	7.10054	2.50995e+06	33.0973	4.21762e+06	69.2981	7.46465e+06	3.36481	165030	4.02557	294337	60.7566	5.52849e+06	3.54003	146919
21.3493	3.34221e+06	30.2745	3.44285e+06	98.2932	1.20484e+07	13.889	825042	0.344107	633136	8.26473	367486	86.5674	2.59118e+06	6.95471	748490	1.2263	0	80.0746	0	11.8923	526205	34.9813	7.61706e+06	11.5304	0	17.3134	2.84516e+06	2.20261	243075	80.542	6.28154e+06	8.31368	1.28805e+06	0.525432	0	38.8728	4.33062e+06	12.7133	1.05498e+06
7.47994	688691	69.578	5.79688e+06	89.3928	8.52396e+06	19.1945	1.26031e+06	7.32343	73279	11.0579	3.69489e+06	188.223	4.15085e+06	0.734875	573175	4.64721	257894	7.89405	0	16.3563	1.60111e+06	19.1261	6.42443e+06	75.79	5.96043e+06	20.0615	2.2374e+06	0.811486	0	56.7623	5.55332e+06	150.081	7.91651e+06	1.93736	230516	4.46513	0	0.464955	0
7.5762	1.198e+06	87.1757	6.53395e+06	101.299	8.41765e+06	8.08189	489294	9.50881	102315	55.9456	6.29385e+06	168.873	4.97313e+06	16.1629	5.48747e+06	63.4462	1.53283e+06	56.8831	4.07847e+06	18.6495	234837	17.3603	5.93255e+06	55.0845	3.7647e+06	8.72585	811647	21.1573	0	56.5111	1.73944e+06	173.682	5.04582e+06	1.53739	118047	3.77195	169983	23.5672	1.82447e+06
1.31156	542986	24.0295	3.50915e+06	75.9407	1.10876e+07	0.262863	0	14.8053	679056	55.8809	5.40021e+06	91.0658	3.02166e+06	23.5672	6.67175e+06	22.9559	1.15343e+06	18.4114	2.93722e+06	10.7134	151405	5.86665	940778	95.3954	5.62748e+06	4.74886	640879	101.635	860997	39.4704	0	40.718	643677	6.6768	541876	14.6731	765679	91.9953	1.0721e+07
26.3469	2.33114e+06	18.2743	1.66043e+06	72.1207	6.61831e+06	4.47045	499815	34.7571	857161	51.1162	5.09755e+06	0.602369	106539	20.8701	6.40179e+06	21.1308	1.02725e+06	10.9105	2.0195e+06	60.2349	4.89833e+06	14.204	0	146.67	5.39042e+06	11.9356	4.34951e+06	53.2773	6.33228e+06	5.87186	0	53.25	1.73007e+06	7.65842	1.47298e+06	14.5946	531005	50.0948	1.43825e+07
5.48257	2.34193e+06	10.6497	596034	12.2741	1.57941e+06	21.005	2.02676e+06	54.0652	1.03159e+06	42.2857	5.29953e+06	5.44444	257027	22.3197	3.48303e+06	39.7859	1.64507e+06	10.8232	3.09701e+06	123.954	8.48012e+06	19.2584	1.00129e+06	127.721	6.25724e+06	34.2543	5.99125e+06	36.6284	7.79372e+06	3.16331	314320	54.4776	2.15963e+06	31.5063	4.04517e+06	9.0702	477089	17.3203	4.04937e+06
41.6749	6.52021e+06	2.76019	265489	52.1339	4.23419e+06	18.3899	2.0002e+06	70.4558	1.17386e+06	35.9373	5.9966e+06	16.0363	588979	3.3762	0	49.4956	1.65171e+06	59.6829	4.90351e+06	92.0121	6.54055e+06	17.7965	3.49336e+06	72.8527	3.75518e+06	29.4116	3.68576e+06	45.7296	8.93821e+06	11.5074	2.26961e+06	4.92389	253869	61.4158	5.79999e+06	25.2803	2.39642e+06	11.3925	994719
54.5588	6.19889e+06	5.86118	681002	37.3752	6.69142e+06	17.0782	3.75046e+06	28.5379	891177	36.4155	5.41689e+06	16.8883	272957	7.25233	2.65425e+06	36.7247	1.40039e+06	84.4716	5.7453e+06	94.2824	5.10859e+06	17.903	1.50521e+06	21.1897	0	29.7999	2.99438e+06	58.6252	1.00956e+07	80.1633	8.30616e+06	7.07605	330399	29.8601	5.51367e+06	100.841	6.5591e+06	8.15909	607018
63.4596	4.96536e+06	21.7003	3.79418e+06	44.3659	7.57535e+06	13.9942	1.28448e+06	7.1305	128564	32.5446	5.51889e+06	7.15483	125052	53.3252	6.51114e+06	19.3115	234936	108.81	7.26133e+06	61.1043	3.0849e+06	68.2878	6.1389e+06	1.92321	24475.9	10.2844	2.0053e+06	86.205	7.70548e+06	153.775	9.28489e+06	2.92347	66039.7	8.38454	4.98352e+06	127.178	5.58864e+06	16.9888	260746
17.0889	5.1972e+06	55.9905	5.35452e+06	47.8748	7.46727e+06	7.4206	852770	3.48402	163526	27.2599	2.03016e+06	53.5066	1.38377e+06	41.6725	6.0157e+06	77.0588	1.54098e+06	136.764	8.26347e+06	32.7683	3.11411e+06	65.0205	1.18981e+07	24.1579	0	19.9402	2.60008e+06	20.0531	6.55044e+06	147.15	7.82976e+06	3.84317	667858	14.8646	1.45956e+06	27.1217	3.54481e+06	13.2434	321666
26.8594	5.5887e+06	68.1914	6.98987e+06	56.3339	9.21218e+06	10.2833	750563	1.13098	108389	17.3732	2.07144e+06	207.515	4.16884e+06	40.774	7.89567e+06	42.012	1.46339e+06	164.332	0	10.7716	1.14194e+06	84.145	1.12969e+07	75.3239	5.21581e+06	18.0176	2.10123e+06	1.58482	983746	115.59	5.86072e+06	7.40752	1.04215e+06	1.99691	0	1.01852	0	9.66745	795715
52.9612	4.65062e+06	105.246	7.33863e+06	121.716	8.4342e+06	10.8747	408019	13.894	614792	40.1716	5.75105e+06	171.322	4.4883e+06	17.2627	4.51994e+06	32.15	1.34553e+06	22.5721	0	19.5985	425171	32.0943	8.00651e+06	82.25	4.60874e+06	2.05936	303319	0.55651	0	97.406	2.57201e+06	119.599	4.56894e+06	1.7283	120605	2.58326	158709	1.45202	0
22.8831	2.47961e+06	67.4229	4.48042e+06	98.7739	9.47424e+06	13.3319	849019	62.3448	1.3783e+06	20.5522	6.12223e+06	110.386	4.5629e+06	2.75114	0	50.2936	2.07287e+06	42.9848	2.46471e+06	19.8925	222227	32.9892	3.77197e+06	145.417	3.96164e+06	3.7343	527423	25.8032	0	60.5307	0	206.737	7.51902e+06	0.634345	41548.2	7.72504	95512.1	0.159252	1.68666e+06
19.5533	5.84557e+06	28.1654	2.97932e+06	93.9062	1.08609e+07	13.3381	1.59819e+06	47.3416	1.58687e+06	30.808	5.54946e+06	55.6784	2.2681e+06	8.216	2.04318e+06	29.4473	3.28682e+06	155.816	8.10202e+06	10.2733	18081.5	1.39548	0	241.642	2.98253e+06	19.9201	4.93103e+06	61.768	1.43273e+06	5.83417	0	136.72	4.73508e+06	6.15683	851781	12.7285	164205	77.8258	1.4064e+07
102.605	9.46444e+06	17.7331	1.39236e+06	72.3503	3.02936e+06	1.41143	0	57.6896	1.4669e+06	55.9466	5.14415e+06	15.144	952963	41.1817	5.1406e+06	29.3435	3.14819e+06	49.4182	3.93518e+06	57.7084	4.1699e+06	10.7249	0	133.657	5.79018e+06	27.2038	5.70306e+06	84.3997	8.20623e+06	8.81038	649736	45.1501	1.60144e+06	6.22065	631360	11.7679	364601	44.0623	1.81438e+07
129.012	5.83548e+06	10.4563	2.37477e+06	18.9535	2.90452e+06	44.3237	4.78995e+06	46.5913	1.38186e+06	36.3566	6.14128e+06	18.4888	1.20499e+06	52.4115	5.39158e+06	38.2061	2.41098e+06	16.4349	2.55443e+06	123.894	6.86262e+06	11.2723	1.45303e+06	60.9262	6.19739e+06	35.5148	3.89528e+06	64.1792	9.125e+06	19.6953	3.3541e+06	11.2681	311046	27.4478	3.42608e+06	44.0485	3.44895e+06	19.5885	9.26897e+06
28.3373	5.026e+06	26.3066	1.4355e+06	62.9768	6.33968e+06	53.8524	5.00786e+06	59.5396	1.41943e+06	42.9144	5.92018e+06	40.0028	1.38051e+06	62.6943	7.53718e+06	37.1766	2.88994e+06	36.449	7.29035e+06	74.3089	6.13829e+06	11.7571	4.49284e+06	99.234	1.5325e+06	46.3696	3.47201e+06	65.1976	7.49408e+06	118.978	7.72423e+06	4.91672	12012.5	62.0486	4.43356e+06	120.554	6.31707e+06	13.3848	1.55756e+06
24.8974	5.26644e+06	11.5483	3.04342e+06	39.6454	5.63395e+06	78.6941	5.45246e+06	31.5857	1.1769e+06	40.6001	7.53303e+06	35.4304	1.38853e+06	55.6271	7.33736e+06	2.05329	0	116.487	9.00934e+06	85.2564	6.46857e+06	37.8149	5.44742e+06	18.3314	781935	0.693071	964780	101.023	1.05293e+07	246.18	6.70741e+06	3.89911	28998.2	51.034	4.00406e+06	135.755	6.24482e+06	15.4867	1.30443e+06
50.8629	5.16e+06	5.34926	3.75487e+06	42.7534	6.25466e+06	44.7613	4.15677e+06	7.52841	136128	32.4411	2.50172e+06	92.0795	2.91052e+06	43.1708	3.6585e+06	2.43875	328045	120.962	8.73643e+06	56.2406	3.45259e+06	111.044	1.03546e+07	0.670724	0	20.0969	2.36581e+06	83.0313	9.39038e+06	193.221	6.58931e+06	3.53714	0	43.9122	4.22418e+06	53.9004	6.15156e+06	11.73	883678
26.7682	1.6059e+06	41.7625	5.45353e+06	45.2026	5.72658e+06	19.0143	2.14055e+06	11.8328	503465	23.6694	2.11389e+06	91.3933	2.06893e+06	0.216501	83029.3	25.9923	2.28321e+06	80.6915	5.74265e+06	36.3814	1.77361e+06	152.439	1.22278e+07	37.8231	0	14.7666	1.25168e+06	5.3501	4.86611e+06	149.588	5.63682e+06	2.02931	16466.6	17.5535	710337	3.0716	0	10.2186	1.14465e+06
0.336255	263770	89.8376	7.1104e+06	77.3328	6.36431e+06	8.80571	489920	0.137897	88735.9	44.0918	5.02135e+06	183.972	3.61813e+06	6.3815	1.08734e+06	26.4002	1.30966e+06	54.8584	481552	14.497	790517	79.7114	8.75657e+06	85.4664	5.53095e+06	1.02312	115168	12.5519	825114	200.695	1.31011e+06	1.44751	1.03389e+06	1.41725	0	0.52895	23310.4	2.22826	803014
9.43155	2.86966e+06	153.929	9.38267e+06	93.0969	6.46294e+06	10.44	543093	26.3828	1.02408e+06	14.0243	6.19572e+06	210.475	3.84399e+06	30.4328	4.99422e+06	23.4212	1.42091e+06	13.6956	0	17.5344	57735.7	64.3394	7.10524e+06	94.219	3.3457e+06	11.6226	1.50967e+06	2.6519	131314	67.3952	0	31.5835	1.8693e+06	1.232	73792.9	7.50191	536778	0.14823	0
28.5755	7.17067e+06	89.0619	5.5277e+06	121.369	9.58359e+06	9.68575	1.10215e+06	79.8534	1.59896e+06	32.6566	5.12472e+06	238.034	4.42526e+06	30.9755	4.81853e+06	14.1227	3.36817e+06	3.88433	9685.6	15.7712	102008	52.5568	5.17691e+06	152.002	3.24956e+06	33.5775	5.21579e+06	6.7324	0	0.233386	0	267.322	8.88569e+06	0.573898	168146	14.1128	352660	116.118	5.95426e+06
144.968	8.18127e+06	101.479	4.67314e+06	140.483	1.14999e+07	2.15059	648895	109.589	1.86514e+06	54.3362	5.60569e+06	96.2555	1.74143e+06	70.342	7.01726e+06	4.37217	3.09005e+06	65.2266	3.00049e+06	12.4747	37297.1	0.190186	0	95.4819	4.71194e+06	29.2274	5.56728e+06	45.7913	196634	3.18307	0	202.854	5.8454e+06	5.40756	263601	14.2717	1.40274e+06	152.903	9.34624e+06
145.169	6.28409e+06	21.9724	3.10077e+06	82.7846	3.36891e+06	3.46609	15495.3	73.5132	1.37005e+06	47.5311	5.30451e+06	8.76641	304465	114.295	8.82251e+06	6.80797	4.4028e+06	41.8415	3.37612e+06	6.76606	883626	9.39879	0	236.576	5.91709e+06	39.2478	3.10962e+06	53.69	7.79366e+06	14.4789	475607	61.3001	2.16914e+06	3.82448	242511	78.3871	5.78977e+06	94.938	1.37436e+07
112.654	5.8552e+06	18.3058	1.69026e+06	68.5034	6.06201e+06	62.7973	4.80272e+06	68.3344	1.49197e+06	56.8026	6.11551e+06	47.6727	2.19388e+06	84.3612	5.38635e+06	16.499	2.74126e+06	28.0373	4.9211e+06	108.924	7.70473e+06	14.7642	1.50465e+06	212.954	7.31249e+06	68.7188	3.67935e+06	111.963	8.73936e+06	37.919	2.93629e+06	14.828	162056	7.00349	2.15085e+06	130.497	5.81518e+06	43.1129	1.30524e+07
54.9083	5.04155e+06	9.07437	672917	86.9573	6.16383e+06	65.409	4.93788e+06	82.1492	1.70356e+06	30.3826	5.14817e+06	116.922	4.16822e+06	2.36543	0	1.45496	3.11391e+06	73.5519	9.86179e+06	80.0504	6.10564e+06	13.1583	3.22171e+06	87.6612	3.95624e+06	3.46044	867502	86.2491	9.73293e+06	127.748	6.40016e+06	4.82915	55459.8	59.42	4.49149e+06	73.2635	4.89707e+06	16.6267	1.8466e+06
67.713	3.53921e+06	0.129645	1.11289e+06	36.1751	5.58588e+06	83.83	7.05591e+06	76.6402	1.71727e+06	59.6151	3.44859e+06	134.803	4.80644e+06	1.08142	452487	2.32072	0	83.8734	9.41714e+06	55.8803	3.34236e+06	32.7213	3.82254e+06	82.9099	942391	8.28144	1.09648e+06	92.2086	1.01662e+07	224.171	8.36064e+06	7.00448	30981.2	40.7931	4.81997e+06	36.8658	2.5199e+06	19.4819	955202
26.4202	5.0576e+06	14.4548	648522	44.8213	6.81914e+06	111.461	6.28667e+06	38.83	1.46117e+06	6.72171	1.05436e+06	122.337	5.20156e+06	6.9249	1.32146e+06	5.28079	644641	29.1299	2.78623e+06	40.9632	1.8761e+06	127.401	1.06954e+07	29.7852	0	21.8449	2.23583e+06	34.5148	9.19178e+06	122.521	3.07133e+06	5.92333	679019	25.0057	3.97209e+06	2.53318	0	18.3794	1.23068e+06
37.069	5.29411e+06	32.8418	6.10606e+06	56.2617	5.42749e+06	97.4139	5.84801e+06	16.3801	399401	23.5679	1.93149e+06	146.533	4.18463e+06	18.6254	2.29618e+06	36.0779	2.41231e+06	49.656	0	63.9272	5.00062e+06	133.246	1.40548e+07	38.4834	0	25.5714	1.92185e+06	0.535024	1.9887e+06	155.379	510709	3.02862	1.12473e+06	21.9711	269317	5.04247	157648	17.3076	1.38261e+06
133.535	7.55665e+06	69.6062	7.05894e+06	67.3653	6.75848e+06	47.1675	3.75341e+06	0.399441	0	73.1623	4.93221e+06	137.652	3.89003e+06	34.3086	4.37258e+06	40.9225	2.18606e+06	7.04281	0	40.038	3.15778e+06	36.7588	4.78792e+06	102.027	5.67191e+06	46.5465	4.11962e+06	3.7915	297580	160.332	0	3.59649	873664	1.9082	0	19.3319	1.66313e+06	23.1625	806708
149.331	7.41005e+06	71.4139	5.8069e+06	83.1886	8.39953e+06	20.1779	1.70522e+06	20.1865	1.54878e+06	45.2004	5.50199e+06	186.481	3.8175e+06	37.966	3.56329e+06	35.127	4.37016e+06	75.4997	9.55939e+06	13.6736	937071	28.6022	2.72911e+06	56.5551	3.83904e+06	9.37193	1.54345e+06	4.72974	109803	79.3527	0	20.9773	377701	1.53617	49904.4	78.0206	4.90828e+06	2.87666	0
93.8109	5.50109e+06	133.973	6.38696e+06	161.577	1.08089e+07	9.49364	532124	26.847	1.33521e+06	36.1373	6.20505e+06	199.799	3.75495e+06	103.17	5.01502e+06	8.0741	5.04775e+06	113.992	1.10833e+07	15.9073	273000	4.16366	114714	92.1003	4.88059e+06	39.4338	4.35706e+06	0.853361	0	3.47421	0	234.139	6.49437e+06	1.73405	86327	168.542	5.4938e+06	63.4147	2.95946e+06
59.8514	5.42657e+06	43.1021	3.03547e+06	158.098	9.43463e+06	4.18909	328144	49.5095	1.45279e+06	34.6773	5.856e+06	11.4685	223566	72.8951	5.08088e+06	6.89147	523496	111.317	1.10752e+07	9.86487	277102	3.94675	0	241.08	4.90136e+06	26.5622	3.22682e+06	16.2535	0	9.56577	339154	242.014	8.92124e+06	1.89496	1.13779e+06	117.999	6.57419e+06	58.7109	8.03388e+06
68.7171	3.64901e+06	19.9618	3.06376e+06	115.059	0	1.01716	203093	41.0345	1.11938e+06	26.3055	5.18306e+06	9.2018	318719	33.7338	656677	11.3265	2.19328e+06	109.756	9.05203e+06	7.36131	3.65667e+06	5.93605	2.16501e+06	270.259	5.0162e+06	35.5655	2.10785e+06	40.3709	2.68828e+06	45.7669	938822	120.529	4.32695e+06	11.972	5.35871e+06	32.1006	6.69852e+06	29.7922	9.44581e+06
15.9383	3.89412e+06	32.8197	2.45741e+06	32.4426	2.25431e+06	22.5149	1.75825e+06	4.05157	376971	45.7083	6.76363e+06	31.248	2.04711e+06	0.204082	0	15.2254	1.86963e+06	44.7618	5.20111e+06	76.5821	8.2765e+06	8.29045	3.1462e+06	171.393	6.12732e+06	20.011	2.07297e+06	74.2681	9.73444e+06	138.148	4.27227e+06	46.6192	982432	67.5398	4.7059e+06	7.69067	525510	87.982	1.05012e+07
39.2186	4.84776e+06	1.86704	957702	82.5938	4.29837e+06	88.7867	7.24248e+06	9.43512	94358.7	160.604	8.69563e+06	22.9414	738840	0.66389	200505	6.92623	351209	37.2643	0	86.4565	5.74426e+06	35.0668	5.33885e+06	141.307	837279	0.728459	149756	49.8748	1.05115e+07	196.062	8.23469e+06	10.8418	170227	79.322	4.56989e+06	0.426611	0	40.6428	1.83038e+06
114.114	7.39378e+06	78.5409	4.43931e+06	68.7993	6.95611e+06	89.9508	6.32396e+06	64.8884	1.60834e+06	0.349296	0	50.9011	1.80689e+06	1.45308	688426	1.50517	0	0.275743	0	74.252	3.68138e+06	127.137	1.22921e+07	161.632	18344.5	17.3187	2.11689e+06	14.1567	8.90922e+06	194.319	8.41601e+06	4.73535	337384	9.79248	4.00505e+06	0.663279	16720.5	14.3881	861602
226.584	7.2598e+06	138.418	7.01549e+06	67.6954	6.69545e+06	73.5338	6.1103e+06	57.978	1.73139e+06	7.76456	2.21516e+06	111.219	3.56135e+06	10.9747	1.89729e+06	5.83539	152931	62.4578	7.66971e+06	29.5357	2.29774e+06	129.246	1.52844e+07	27.0761	0	47.0327	2.89066e+06	6.5663	0	22.7769	7.10757e+06	29.5427	1.24479e+06	6.19812	0	5.75876	66483.3	12.4482	1.22267e+06
158.64	5.73819e+06	97.1538	7.34533e+06	29.6785	3.61003e+06	60.5187	5.20586e+06	18.681	1.16798e+06	5.14962	410811	105.651	3.86916e+06	30.923	3.89055e+06	16.167	2.80874e+06	105.042	9.59754e+06	25.0905	2.27181e+06	9.79429	3.50391e+06	8.20849	0	45.723	3.63978e+06	12.0339	23002.7	0.756865	0	35.9238	1.30127e+06	1.25244	44344.6	8.38161	140912	14.6433	1.33067e+06
54.4853	5.93156e+06	75.991	4.92033e+06	94.6699	9.08383e+06	10.6964	538704	1.85232	0	13.7167	1.29003e+06	94.2814	3.99104e+06	54.7492	2.47155e+06	40.4042	2.86078e+06	119.84	8.59035e+06	23.5537	1.65517e+06	2.88551	0	76.5558	3.24948e+06	10.8594	753276	7.02244	92905.5	6.2536	0	11.3252	0	1.20546	175446	53.6796	3.57719e+06	17.3343	810931
49.8252	976836	80.8619	5.56655e+06	159.783	1.25456e+07	4.04105	785358	11.339	1.18715e+06	32.9762	4.21919e+06	53.7383	1.62792e+06	0.255721	0	6.48154	4.48179e+06	61.8706	7.2931e+06	16.5345	610147	9.77845	2.60204e+06	52.9258	4.72044e+06	50.4019	3.69959e+06	3.83995	0	10.9406	232329	238.27	6.76545e+06	0.594673	164019	72.3407	5.67958e+06	9.59021	0
36.5694	3.99866e+06	34.4543	3.63764e+06	168.12	1.1152e+07	0.770472	37124.2	15.0348	1.13322e+06	51.9095	5.96656e+06	8.22441	300314	2.97014	473612	3.35807	2.35639e+06	49.6427	6.59125e+06	16.2455	534567	14.5858	2.22245e+06	163.947	4.41483e+06	35.7939	3.0693e+06	1.4153	0	30.2882	549698	219.021	6.5843e+06	4.39377	221850	49.2269	5.59865e+06	29.2023	7.73158e+06
45.0675	4.84272e+06	34.6934	3.1347e+06	132.514	4.25507e+06	69.535	3.32468e+06	1.2877	149310	44.7156	5.92386e+06	11.7922	744893	18.2912	748368	3.41318	822586	21.163	0	9.60081	75610	21.9489	3.15476e+06	199.793	4.85374e+06	54.4705	3.63546e+06	1.09003	14646.2	167.861	4.24989e+06	256.46	9.20526e+06	33.9649	4.54138e+06	38.6225	5.76207e+06	27.9124	8.66954e+06
54.44	4.74957e+06	34.6857	3.28331e+06	48.9977	0	113.216	6.17357e+06	5.00777	206972	100.059	8.86155e+06	10.04	946276	6.18868	0	11.3151	717816	0.547259	0	14.7766	4.41463e+06	45.0798	7.73934e+06	150.716	4.07398e+06	8.209	2.05957e+06	2.45019	958751	233.035	5.79177e+06	98.8021	3.59549e+06	71.7813	4.49875e+06	18.1902	1.66437e+06	23.2065	7.77625e+06
105.381	6.0181e+06	14.8524	667273	28.5371	1.90696e+06	119.714	7.26079e+06	1.61643	324065	165.166	8.96713e+06	14.3047	431880			1.03239	0	70.4224	3.26019e+06	99.0321	7.60977e+06	102.491	1.21712e+07	128.265	1.32339e+06	25.7035	1.53576e+06	1.12938	1.29098e+06	202.34	5.25068e+06	82.2318	1.99976e+06	32.9887	5.04838e+06	0.809985	37968.4	14.6754	5.73902e+06
190.589	6.86375e+06	150.008	5.5385e+06	54.1797	1.53832e+06	64.0533	5.43429e+06	0.937615	124207	162.72	6.83031e+06	51.2491	1.20097e+06			0.705574	56470.4	164.256	7.83729e+06	91.1459	5.57306e+06	52.8131	9.89808e+06	150.387	12145.1	26.9086	2.42869e+06	1.00813	529039	111.232	1.78002e+06	37.722	1.30983e+06	11.7869	3.567e+06	3.85728	0	14.7682	2.50191e+06
154.904	5.10106e+06	143.954	5.18459e+06	65.8919	7.1938e+06	55.8483	6.02015e+06	0.333197	0	5.66866	0	48.3489	2.27317e+06			6.71351	858916	61.9163	7.56658e+06	57.157	3.04873e+06	3.02663	305728	32.3444	0	68.511	3.47507e+06	0.960776	99714	27.0855	0	38.2243	2.66948e+06	4.21304	0	5.49968	127767	9.47915	1.76497e+06
6.18449	53911.7	93.623	4.7647e+06	33.9935	7.03377e+06	9.49868	593800	0.13201	0	2.26091	516510	4.44375	142069			13.7589	2.13445e+06	46.9677	9.10853e+06	26.9562	3.30416e+06	19.7739	874724	1.98164	0	13.9111	2.57962e+06	0.943257	29945.2	4.17587	0	33.863	866311	0.735648	44343.5	27.4951	2.63566e+06	5.35845	2.4973e+06
5.37989	385809	66.6868	4.46083e+06	23.494	6.88711e+06	4.41285	0	0.275933	0	12.0453	3.1897e+06	0.821047	53359.2			11.1092	1.5533e+06	38.9922	5.72356e+06	21.3387	1.34191e+06	2.36973	0	0.180386	0	55.494	3.40536e+06	7.01858	0	13.7792	0	23.6637	228576	2.88709	170178	131.961	5.67919e+06	8.1245	1.20863e+06
21.7526	1.91934e+06	48.2925	3.66812e+06	92.7155	8.15826e+06	116.182	4.70737e+06	0.578561	0	2.15247	603904	10.3908	778160			4.44786	98983.8	29.402	0	24.7934	2.49798e+06	1.64825	0	9.8644	823946	36.9601	3.09065e+06	7.05155	25436.8	11.115	0	2.47939	0	0.799512	498715	100.8	6.18425e+06	3.60232	72184.4
32.7658	2.7336e+06	16.457	1.10346e+06	152.894	1.09502e+07	145.138	5.78175e+06	1.57961	0	15.325	1.37347e+06	10.3169	83295.7			0.87493	545227	1.1457	0	18.0253	373546	1.22943	2.79966e+06	56.8978	690367	38.4107	3.12451e+06	3.14624	0	78.0246	0	272.52	7.58516e+06	2.93865	252659	51.2911	6.22347e+06	1.67699	0
43.2501	3.86816e+06	21.7538	2.09548e+06	142.953	1.26803e+07	91.7059	5.75334e+06	1.49634	0	26.7258	2.84843e+06	10.8352	668651			32.8778	478104	37.7266	562428	12.3775	140858	3.18451	1.84668e+06	70.4935	1.93604e+06	0.86619	895628	2.66824	0	213.013	0	235.719	8.73682e+06	20.3036	1.57963e+06	29.663	5.84797e+06	25.8656	1.74732e+06
66.9318	5.02841e+06	0.122747	0	88.2534	3.20978e+06	30.1299	4.12785e+06	3.60748	0	58.7016	5.57918e+06	11.2819	379752			3.50937	74805.4	87.9569	4.07422e+06	6.06135	30266.2	23.9554	3.6059e+06	63.7967	2.03978e+06	24.162	338781	2.81098	27642	200.733	0	202.279	8.32852e+06	53.7824	3.5905e+06	7.54636	1.25688e+06	29.8737	1.05645e+06
49.4477	2.07548e+06	76.1368	2.17317e+06	18.5681	1.26226e+06	47.5792	4.89151e+06	5.54416	0	82.8494	2.9036e+06	3.82928	133543			0.262915	0	92.1069	4.13927e+06	47.5225	4.49901e+06	20.4664	7.67512e+06	89.9213	1.21571e+06	42.405	2.41261e+06	0.924047	111275	122.593	0	63.2915	2.24949e+06	18.0098	3.17725e+06	0.894012	41100.6	19.2521	741602
1.48577	0	36.28	4.37571e+06	13.8526	2.59769e+06	31.4271	2.52366e+06	3.50622	0	60.0832	1.9687e+06	2.67458	87379.9			0.318926	0	30.3044	1.14406e+06	61.0281	6.47782e+06	44.0977	1.23241e+07	76.6346	4646.27	25.8626	2.26355e+06	0.7261	63907.6	39.2273	0	90.5721	2.45162e+06	1.15645	1.89555e+06	3.07293	56016.1	19.5023	1.56497e+06
1.81433	0	47.5966	3.68155e+06	53.2703	3.06299e+06	2.82108	0	3.34918	0	26.3228	1.72925e+06	9.42076	297010			7.20799	0	7.40586	0	43.2835	5.42902e+06	64.4877	1.82002e+07	25.0632	0	48.1767	3.06443e+06	1.47085	88964.9	0.160781	0	59.6346	3.25758e+06	2.22689	0	4.60096	277503	17.2352	1.61785e+06
0.691735	0	63.7001	3.89714e+06	24.2327	3.66054e+06	24.8542	1.64892e+06	0.221901	0	7.40743	372902	4.0608	65477.3					1.73079	0	42.4877	2.51371e+06	53.8326	1.45336e+07	0.495046	0	29.4262	1.98089e+06	0.316495	164505	1.11619	0	66.5157	3.85162e+06	0.639348	0	25.9777	1.14151e+06	17.2378	1.48436e+06
3.40074	20197.6	33.3165	2.71343e+06	28.1526	3.95564e+06	78.6502	4.55658e+06	2.60092	0	1.40686	150382	0.427303	0					13.7366	0	20.6551	1.23777e+06	117.906	7.02965e+06	2.13151	0	35.5556	2.85039e+06	1.09844	20954.7	40.0078	0	32.649	870610	1.96627	26101.1	114.687	3.08259e+06	10.8044	1.99914e+06
18.6899	1.61046e+06	13.9028	1.9615e+06	62.0795	8.37413e+06	34.1613	3.80667e+06	6.40612	0	7.72691	1.04476e+06	0.853919	7462.12					15.0292	0	26.6739	3.17278e+06	9.11689	0	6.02028	0	1.83433	1.71348e+06	3.05168	0	64.9259	0	4.82461	159503	5.62722	23113.1	120.309	4.09635e+06	12.4581	833932
0.968206	809022	0.141987	495084	68.8378	9.91511e+06	36.6288	4.0966e+06	1.53066	0	3.93483	424317							5.01727	0	23.0696	1.29515e+06	0.193477	0	30.5584	0			3.37913	0	38.5393	0	47.605	2.51891e+06	3.60751	0	75.4891	4.46369e+06	6.92605	0
		14.5887	93079.4	127.66	8.58198e+06	28.4637	3.77921e+06	13.4043	0	6.42875	510251									14.9223	139165	1.84829	1.54367e+06	43.336	0			2.43473	0	20.2427	0	54.5014	3.34635e+06	9.98811	0	34.6883	3.6122e+06	1.59976	0
		23.4415	4.1351e+06	51.8628	0	5.67354	869119	0.239153	0	2.13534	121066									11.6629	14501.3	3.75416	1.95158e+06	48.3259	0			2.37792	0	3.82287	0	16.6897	733340	31.4726	0	11.4928	219263	0.106015	0
		16.7373	3.3751e+06	13.4554	0	0.0595386	0			30.807	749604									7.33045	52685.1	17.1382	3.84402e+06	25.9169	0			5.01968	0			65.314	3.89527e+06	9.91889	0	0.513735	6749.2	10.1253	0
		23.7418	2.77638e+06	1.71188	0	7.85623	1.68223e+06			18.7858	619332									46.1404	4.14101e+06	16.2685	4.40222e+06	1.89588	0			0.845121	0			62.2976	3.44223e+06	4.06678	0	2.51192	9197.53	20.3113	599323
		0.216394	1.6561e+06	4.34636	0	14.1218	2.08636e+06			3.84076	174889									64.8494	6.76644e+06	21.9226	7.08398e+06	0.84776	0			0.455007	0			40.4868	1.7721e+06	3.64438	0	2.48366	0	18.239	0
				4.19914	0	12.9641	2.85389e+06			2.74807	10254.9									43.5378	4.70856e+06	21.0015	9.89529e+06	6.66759	0			0.187614	0			32.2478	1.82874e+06	1.78652	0	15.343	267904	23.2621	0
				14.6419	29229.5	5.08514	1.19822e+06			4.88644	577321									67.1412	4.93003e+06	9.3926	3.49174e+06	14.4915	0			2.30199	0			24.0096	1.50121e+06	0.976924	0	30.2513	725463	16.3774	0
				15.0692	0					1.89996	32784.6									26.2561	2.92681e+06	2.13365	0	8.07867	0			0.392486	0			3.87805	191062	1.42893	0	7.52946	0	9.87151	0
				17.8815	295139					1.0403	0									21.5736	1.89158e+06	0.393454	0	0.778856	0			0.0928385	0			0.851302	0	1.01176	0	0.031378	0	0.552196	0
				50.0283	4.60822e+06					0.55733	12336.9									23.3256	629685	0.503656	58467.5					2.66219	0			0.107888	0	0.441618	0			4.46414	0
				80.9335	4.39749e+06					1.7863	40478.7									16.8197	10291.8	3.87144	670131					0.084866	0			2.67422	0					13.6089	0
				87.0875	0					1.19186	0									5.99729	0	4.37332	812654					2.08663	0			1.50333	0					8.31431	0
				15.0624	0					3.86627	88732									1.29465	0	4.64136	386517					1.08971	0			0.899808	25541.3					9.0862	0
				0.761537	0					1.57331	76364.5									19.7711	2.36824e+06	4.31873	108384					0.75717	0			3.53478	307336					0.878456	0
				0.106936	0					3.54243	101795									34.1125	3.46943e+06							0.426479	0			6.30915	0
				3.87219	0					2.23991	0									26.0232	2.16738e+06							1.00602	0
				24.3323	0					3.04325	59118.7									71.1578	1.87897e+06							0.73759	0
				34.6863	0															19.3157	971117							0.582752	0
				2.00382	0															17.9297	457383							0.156819	0
																				8.35008	11321.7
																				7.49905	11996.2
																				1.62626	0

## Sheet: Fig6-c
	AUC	accuracy	sensitivity	specificity
MILTS	0.88	0.83	0.85	0.82
MILTS+clinical	0.88	0.83	0.9	0.79
clinical	0.71	0.77	0.45	0.9

## Sheet: Fig7-a
tumor metric	TGCT	THCA	READ	PRAD	OV	ESCA	UCEC	HNSC	LIHC	MESO	ACC
AUC	0.718723	0.818261	0.818238	0.657169	0.595673	0.6212	0.613766	0.736455	0.46357	0.672657	0.550958
Accuracy	0.735849	0.727559	0.765333	0.689308	0.52356	0.596154	0.589848	0.681879	0.416667	0.619355	0.548148
Sensitivity	0.632979	0.831264	0.75	0.471318	0.881333	0.786934	0.66209	0.829787	0.934097	0.73839	0.731959
Specificity	0.794393	0.676267	0.769373	0.799438	0.282551	0.487952	0.554708	0.623256	0.132189	0.542553	0.453039

## Sheet: Fig7-b
	BLCA	CESC	COAD	KIRP	LUAD	LUSC	SKCM	STAD	TNBC	ACC	ESCA	HNSC	LIHC	MESO	OV	PRAD	READ	TGCT	THCA	UCEC
AUC	0.870411	0.90877	0.914652	0.765125	0.741848	0.726996	0.874301	0.853556	0.641199	0.550958	0.6212	0.736455	0.46357	0.672657	0.595673	0.657169	0.818238	0.718723	0.818261	0.613766
mean PDL1 FPKM	3.12577	5.23209	1.2116	2.09983	4.81056	6.58358	2.17406	2.72016	2.21571	0.609773	2.30979	4.73749	0.562056	3.01621	0.841081	0.520278	0.963261	2.09456	2.65874	0.740126

## Sheet: FigS3-a
	BLCA	CESC	COAD	KIRP	LUAD	LUSC	SKCM	STAD	TNBC
AUC	0.870411	0.90877	0.914652	0.765125	0.741848	0.726996	0.874301	0.853556	0.641199
Accuracy	0.765476	0.868354	0.865079	0.692647	0.685128	0.65935	0.795122	0.729323	0.580952
Sensitivity	0.880309	0.82664	0.871964	0.846939	0.738534	0.753915	0.783667	0.90276	0.806167
Specificity	0.712522	0.890189	0.861286	0.628421	0.651725	0.596838	0.802292	0.652533	0.470381

[truncated: 8 more sheets: FigS3-b, FigS3-c, FigS4-a, FigS4-b, FigS6, FigS10, FigS11, FigS12]
